# Supplementary material for: N-Arylations of trifluoromethylated N-acylhydrazones with diaryliodonium salts as arylation reagents
Source: Royal Society of Chemistry journal article supplement (doi:10.1039/c9ob00236g), 2019-01-01

***N*-Arylations of Trifluoromethylated *N*-Acylhydrazones with  
Diaryliodonium Salts as Arylation Reagent**

Huaiyuan Zhang, Ke-Hu Wang, Junjiao Wang, Yingpeng Su, Danfeng Huang, Yulai Hu\*

College of Chemistry and Chemical Engineering, Northwest Normal University

Lanzhou 730070, P. R. China

E-mail: huy1@nwnu.edu.cn

**Supporting Information**

**Table of Contents**

|                                                    |            |
|----------------------------------------------------|------------|
| NMR, HRMS copies of compounds <b>6a–6ac</b> .....  | <b>S2</b>  |
| NMR, HRMS copies of compounds <b>7 and 8</b> ..... | <b>S60</b> |

<sup>1</sup>H NMR copies of compound **6a**:

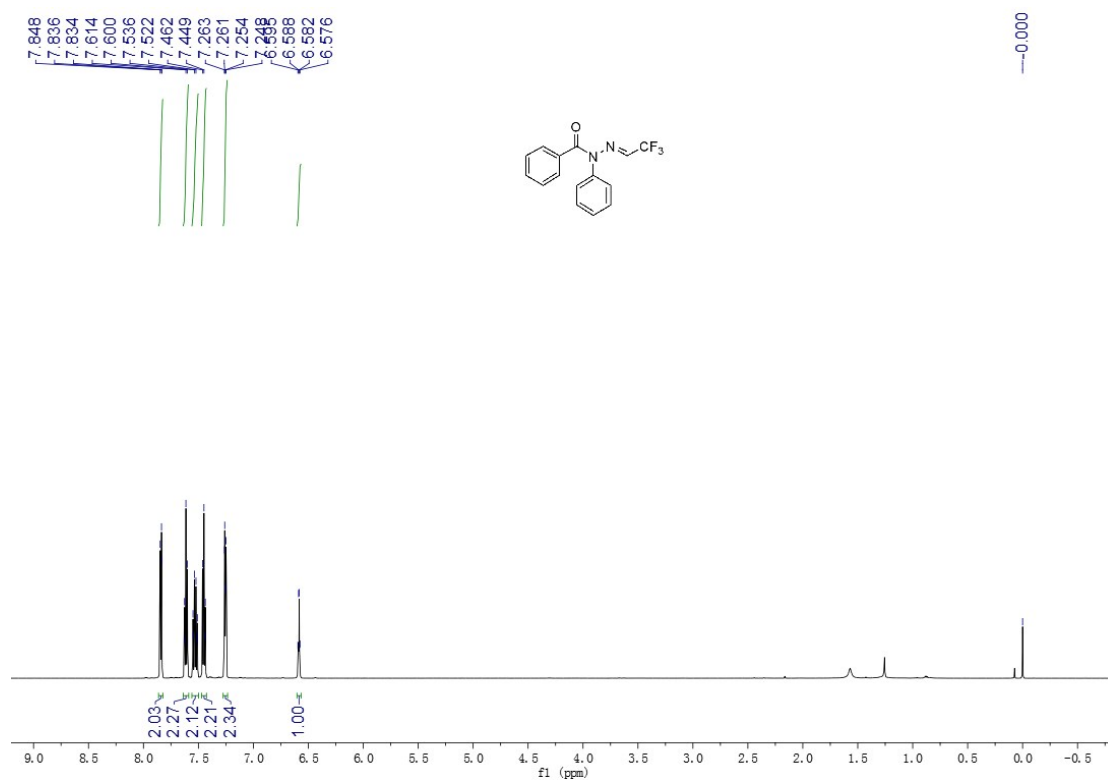

<sup>13</sup>C NMR copies of compound **6a**:

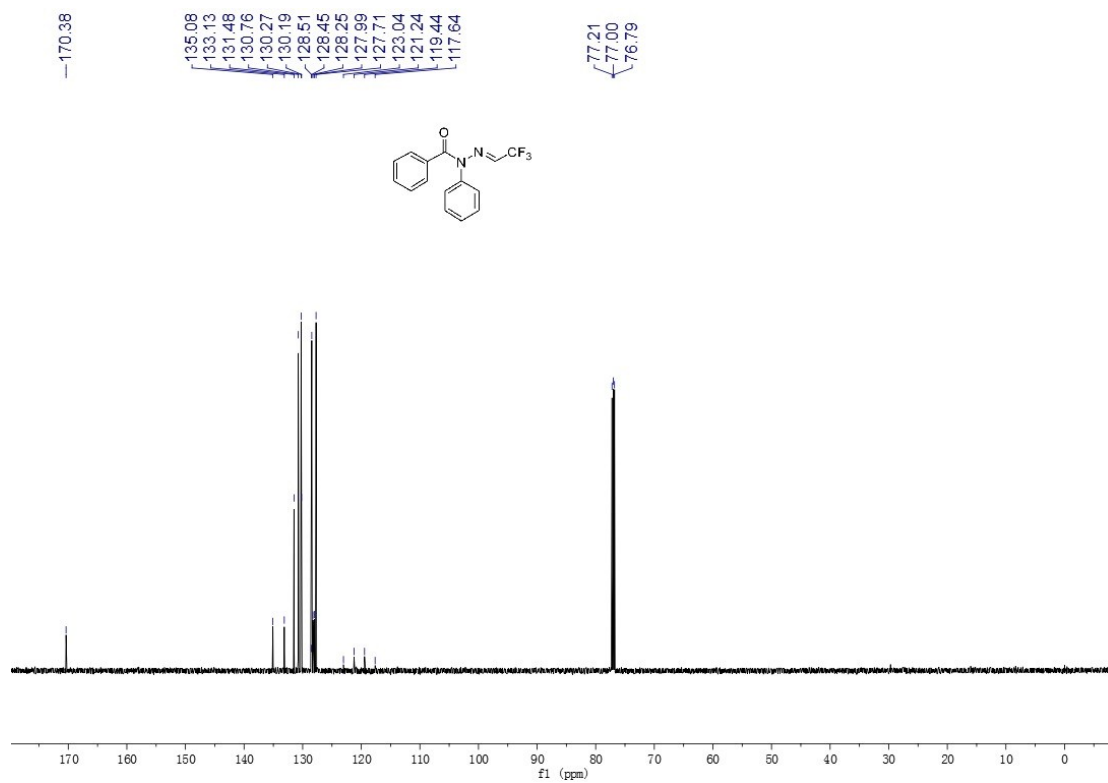

$^{19}\text{F}$  NMR copies of compound **6a**:

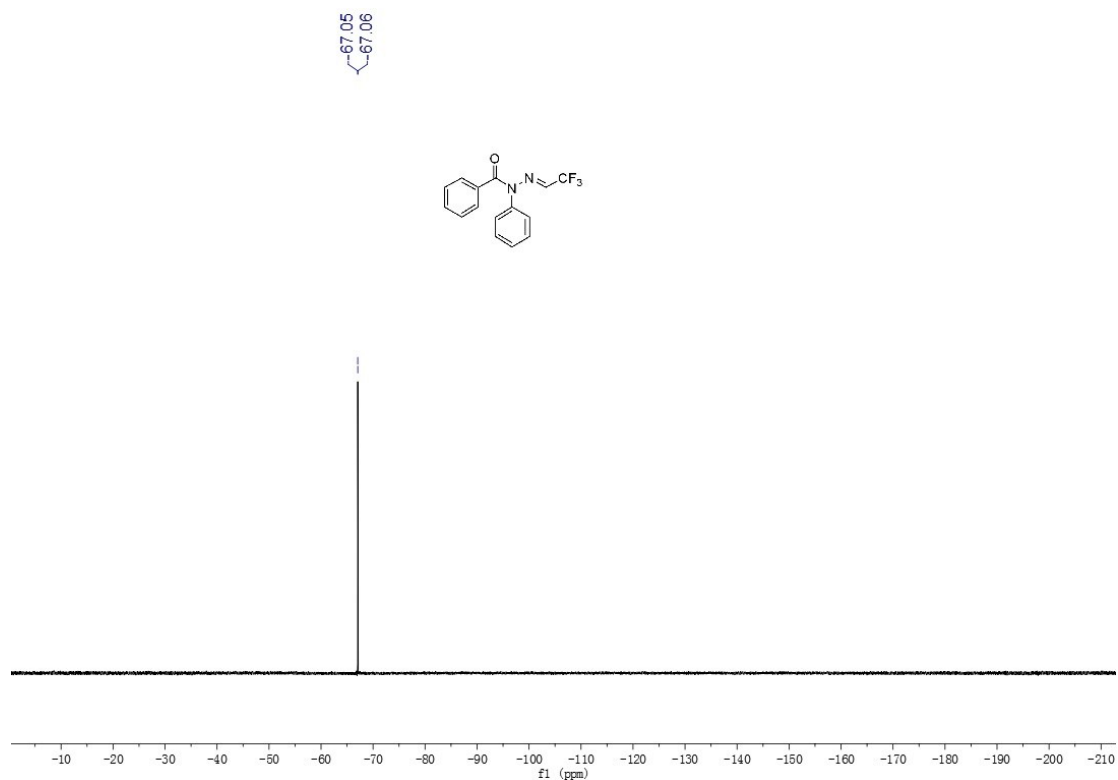

HRMS (ESI) of compound **6a**:

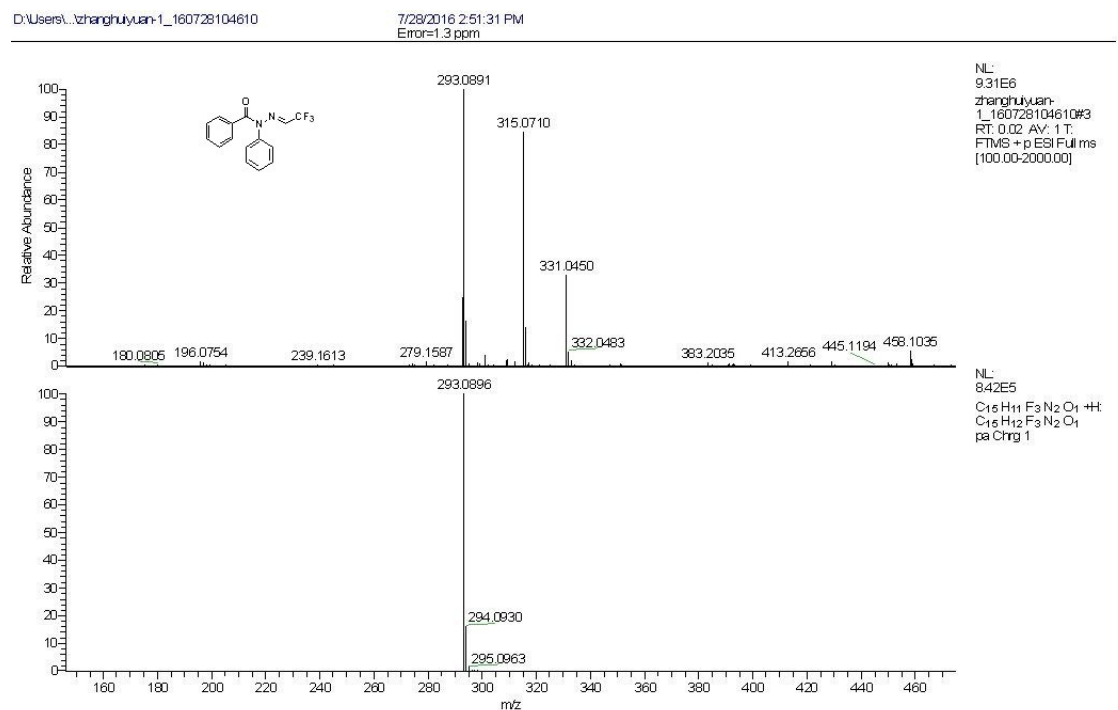

$^1\text{H}$  NMR copies of compound **6b**:

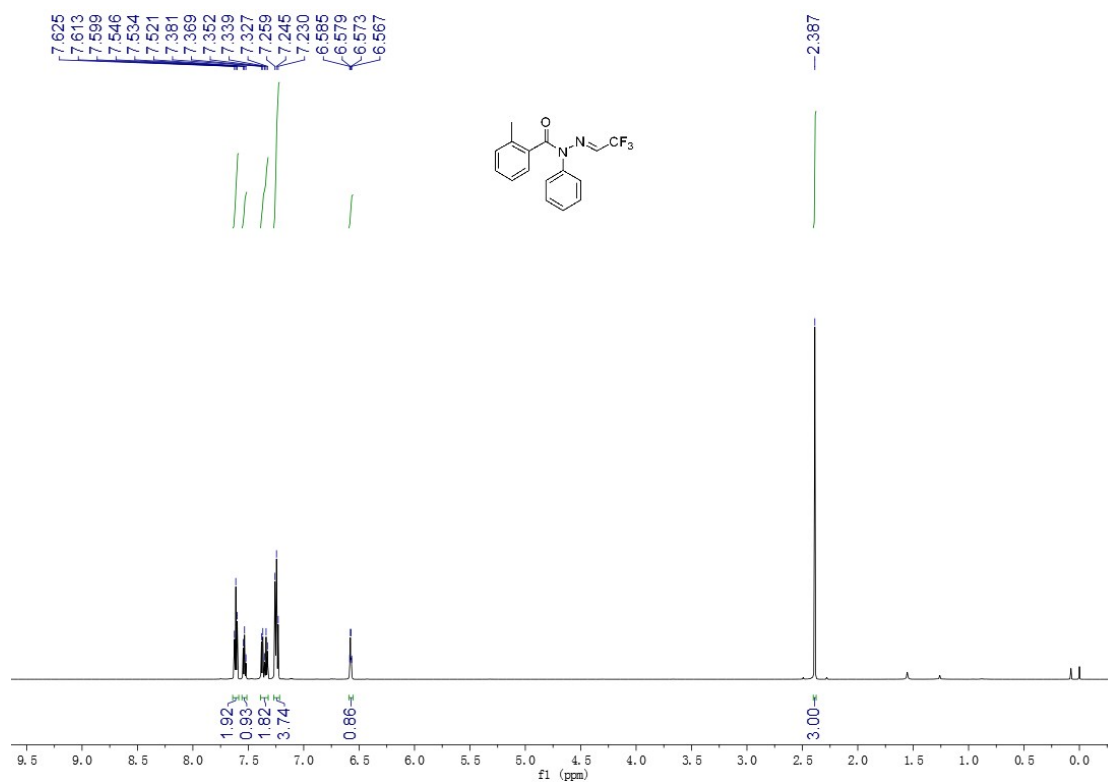

$^{13}\text{C}$  NMR copies of compound **6b**:

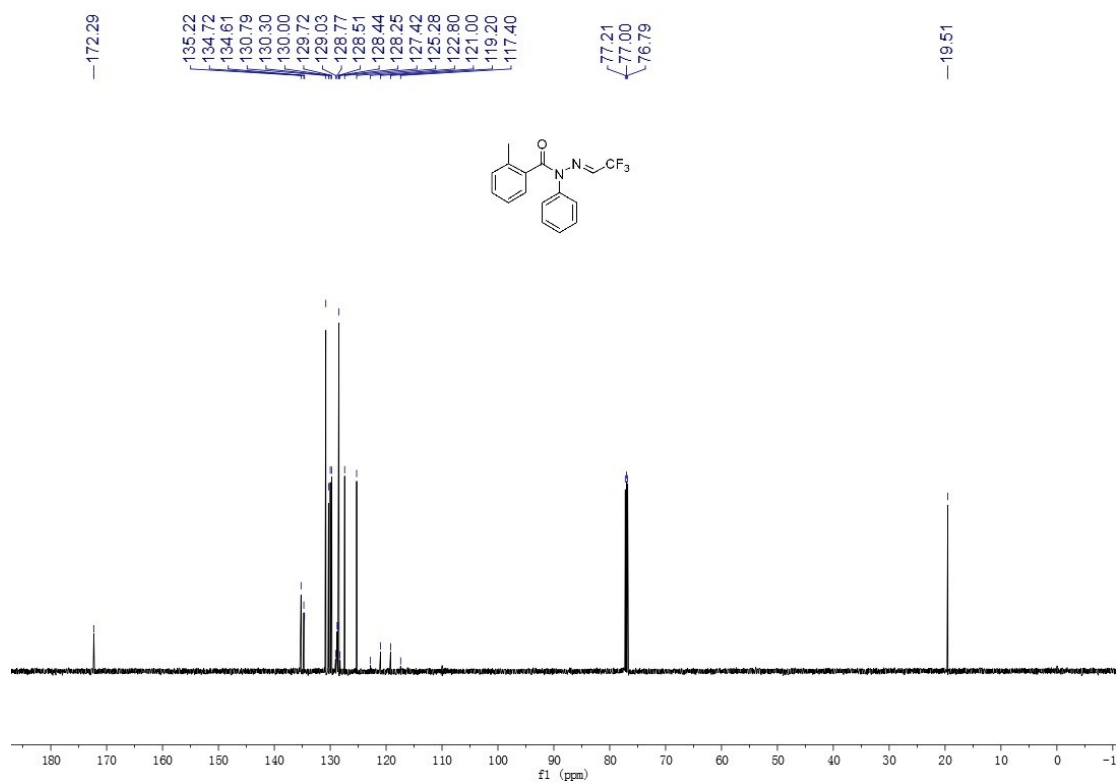

$^{19}\text{F}$  NMR copies of compound **6b**:

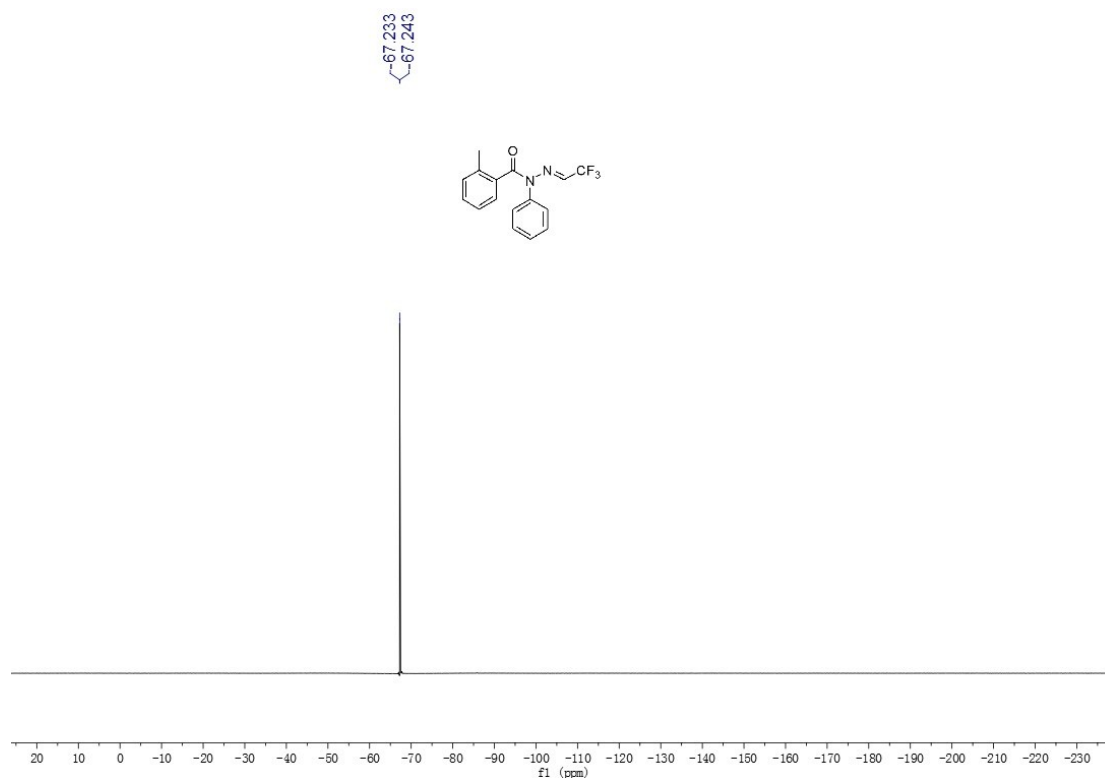

HRMS (ESI) of compound **6b**:

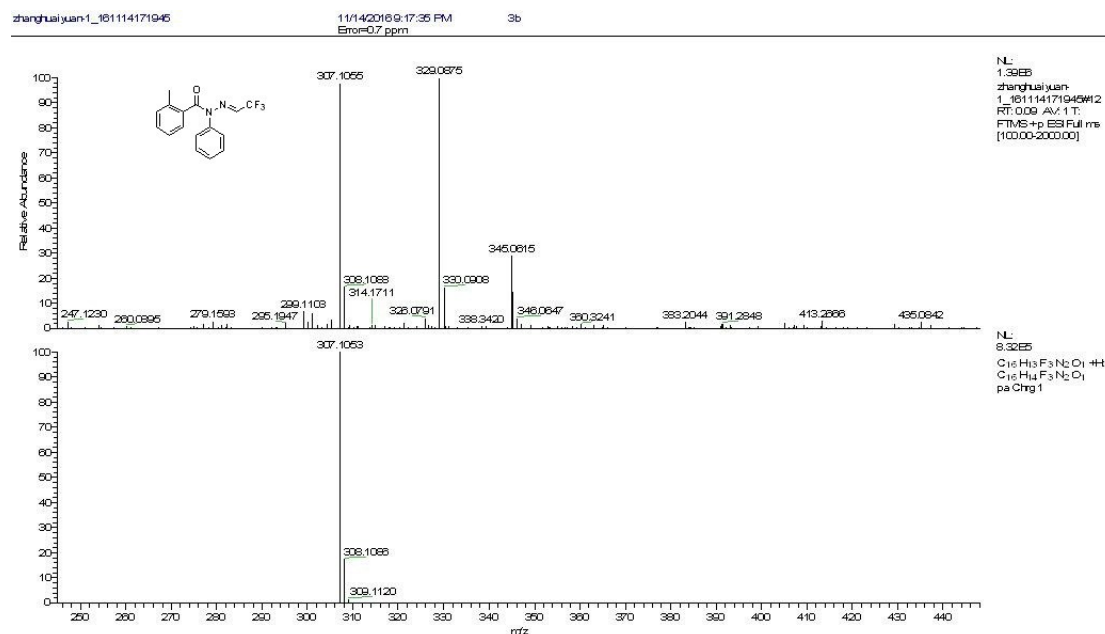

$^1\text{H}$  NMR copies of compound **6c**:

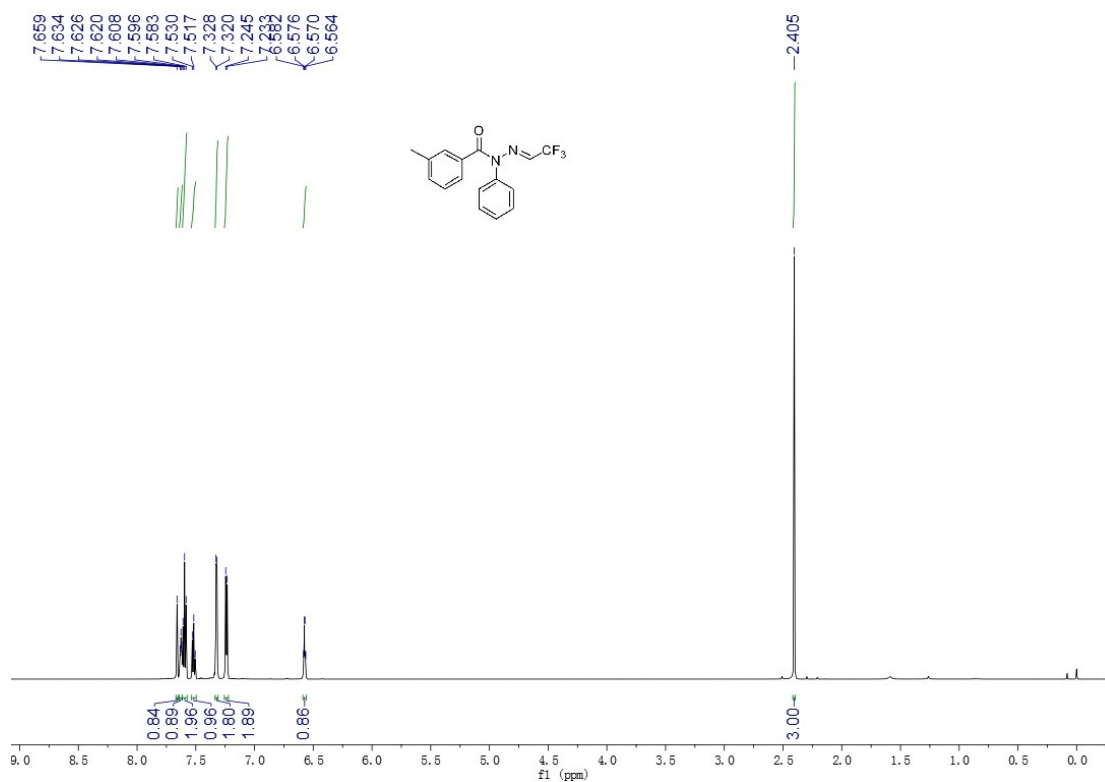

$^{13}\text{C}$  NMR copies of compound **6c**:

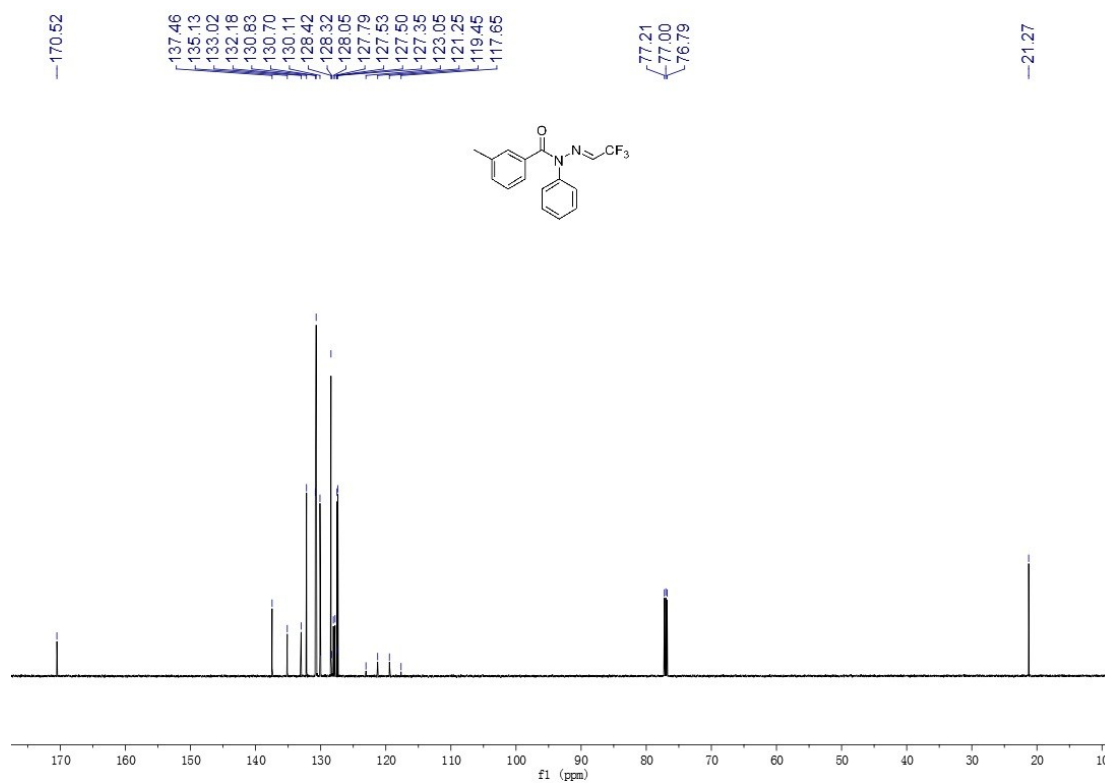

$^{19}\text{F}$  NMR copies of compound **6c**:

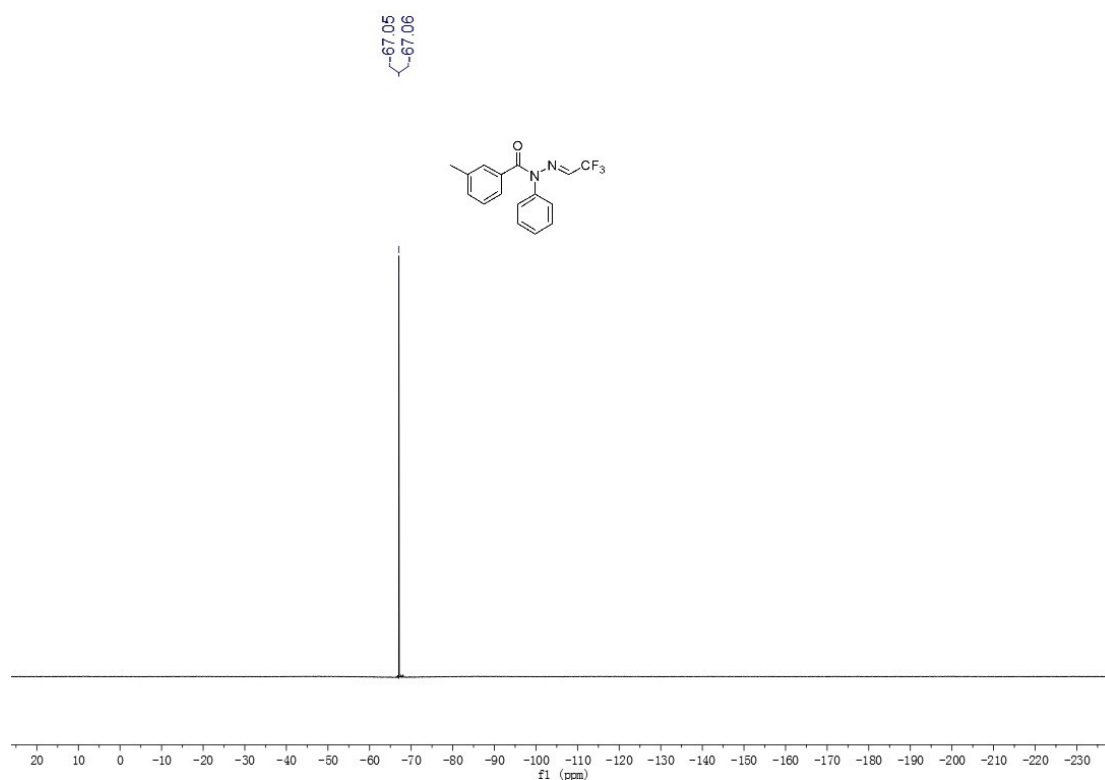

HRMS (ESI) of compound **6c**:

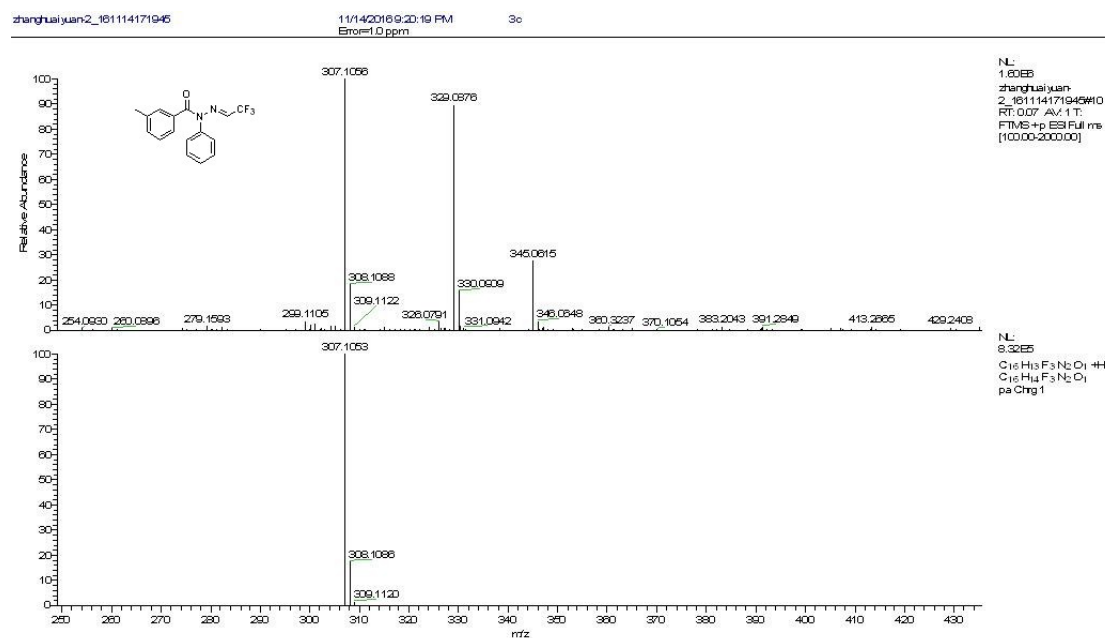

<sup>1</sup>H NMR copies of compound **6d**:

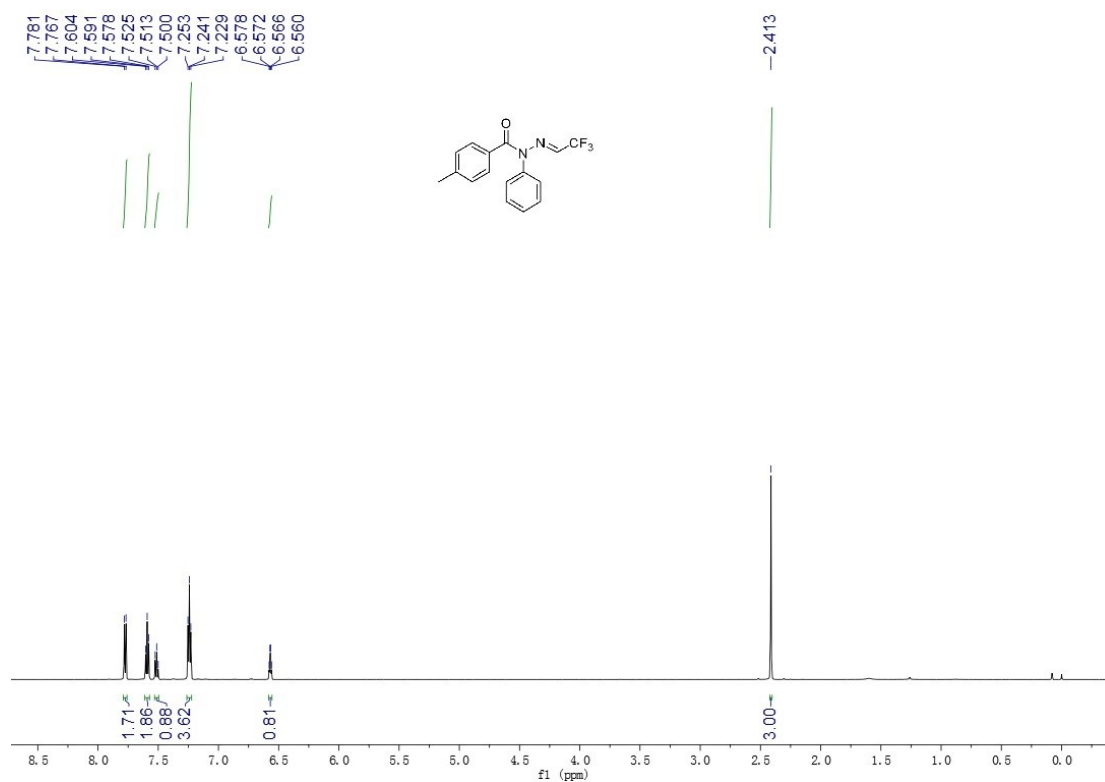

<sup>13</sup>C NMR copies of compound **6d**:

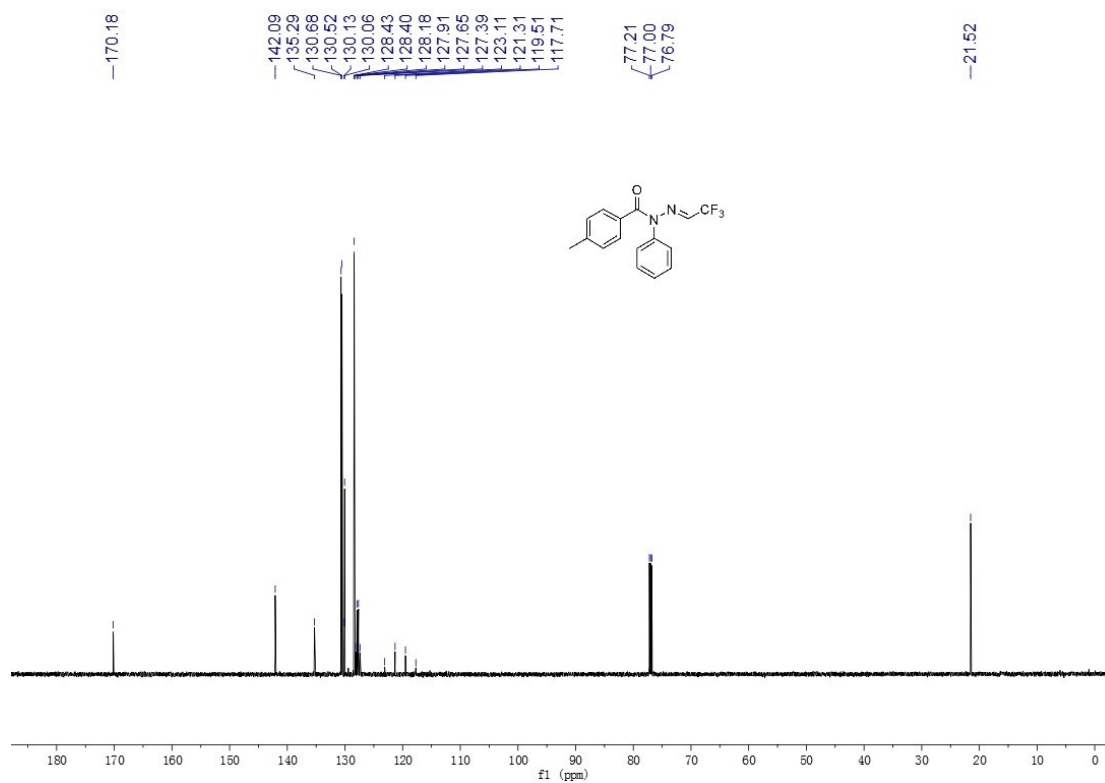

$^{19}\text{F}$  NMR copies of compound **6d**:

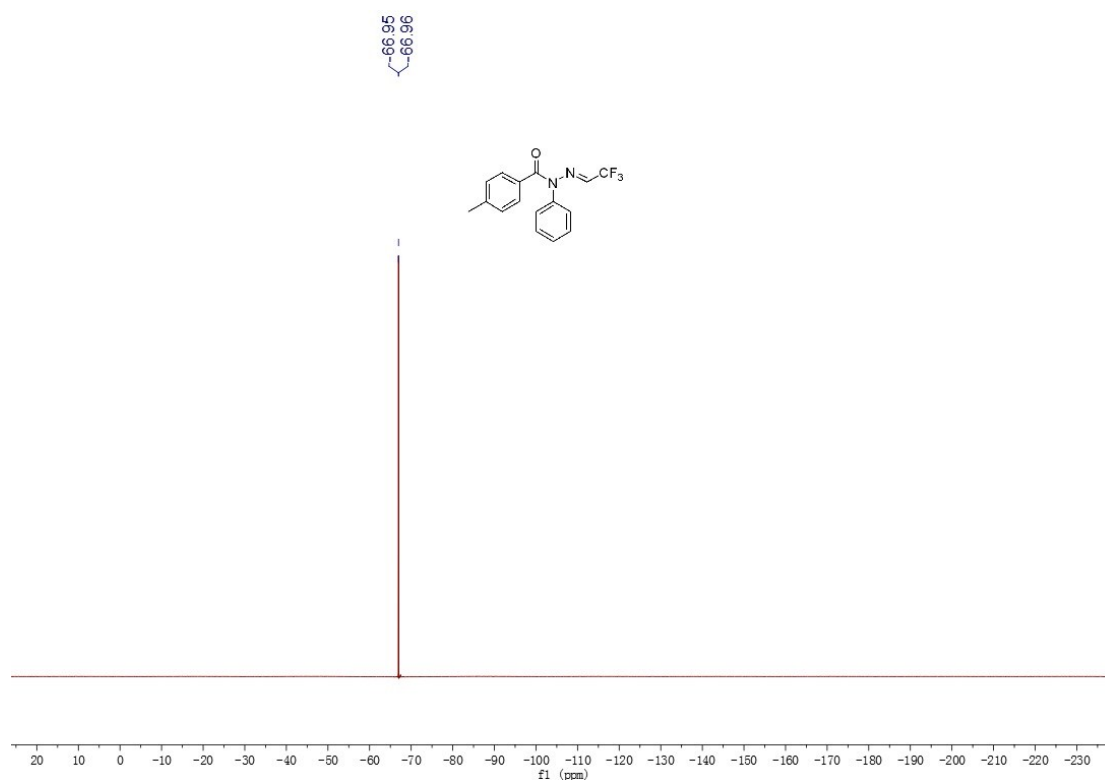

HRMS (ESI) of compound **6d**:

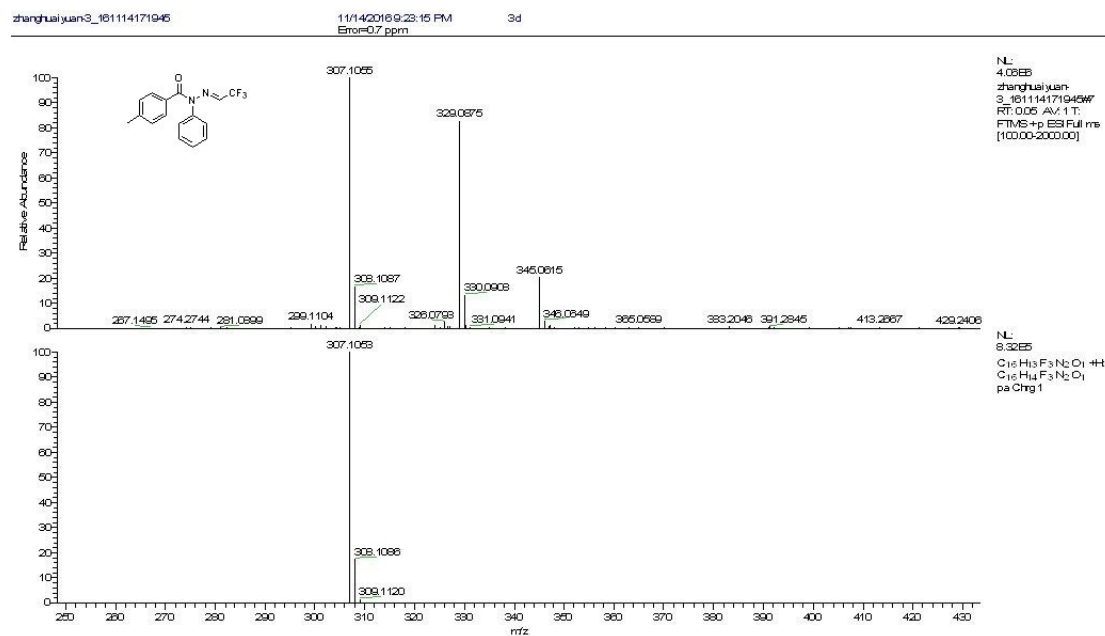

<sup>1</sup>H NMR copies of compound **6e**:

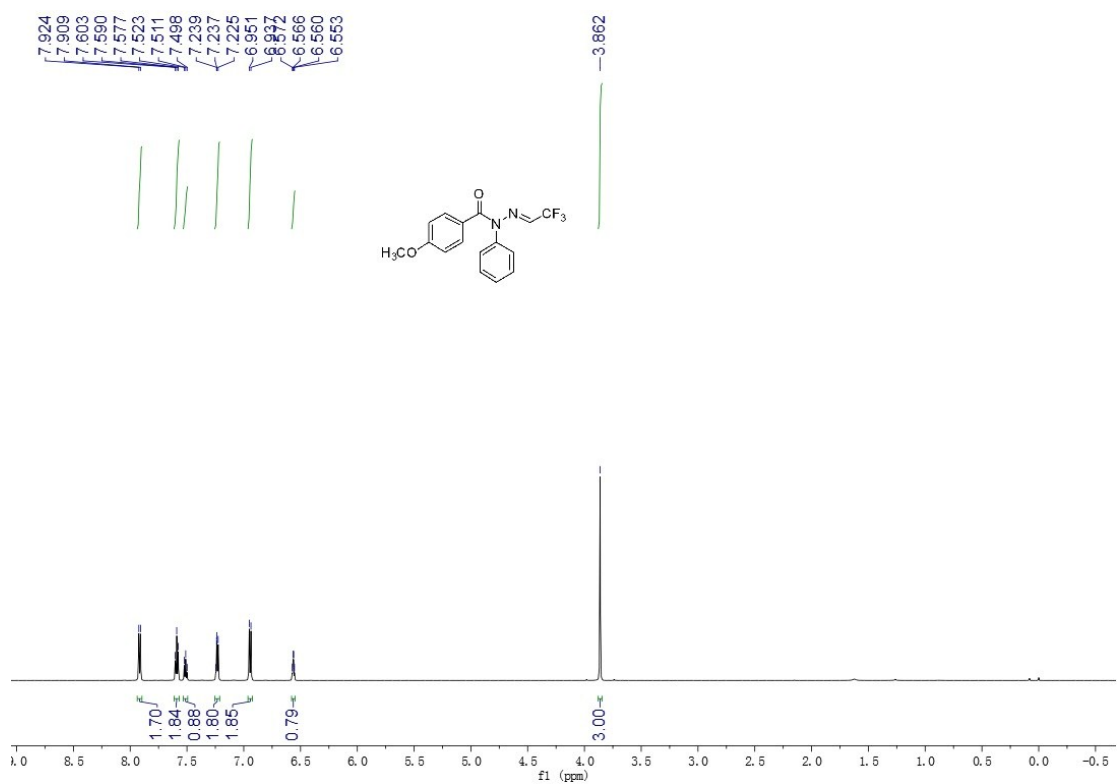

<sup>13</sup>C NMR copies of compound **6e**:

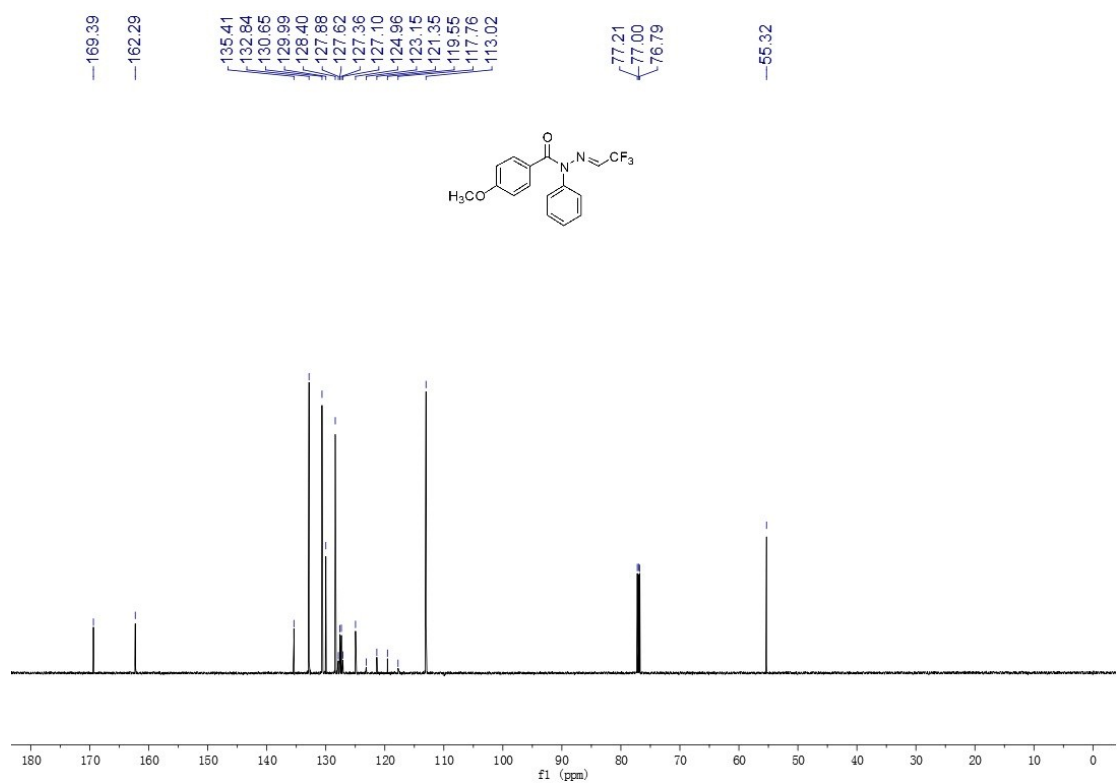

$^{19}\text{F}$  NMR copies of compound **6e**:

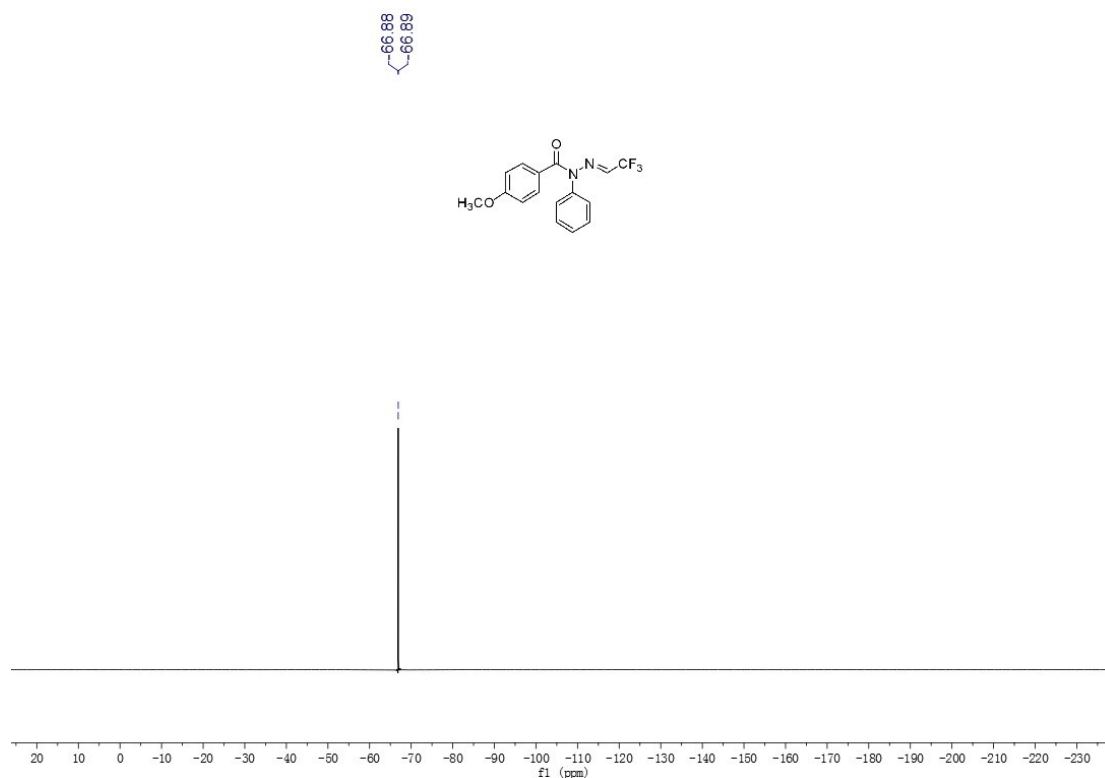

HRMS (ESI) of compound **6e**:

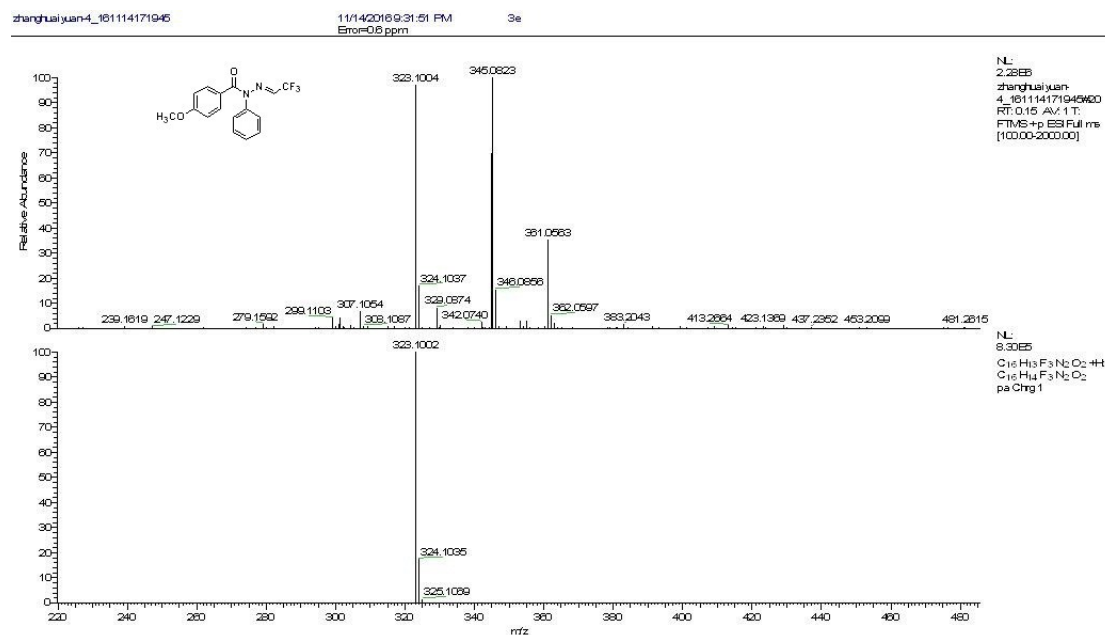

<sup>1</sup>H NMR copies of compound **6f**:

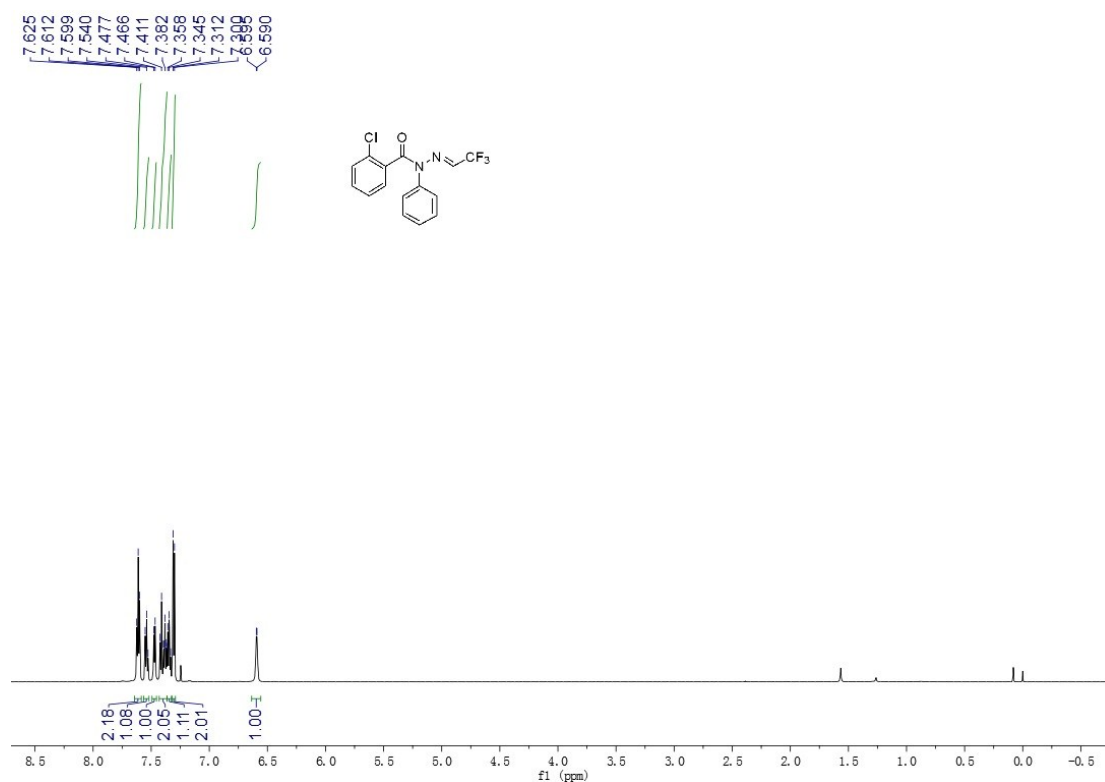

<sup>13</sup>C NMR copies of compound **6f**:

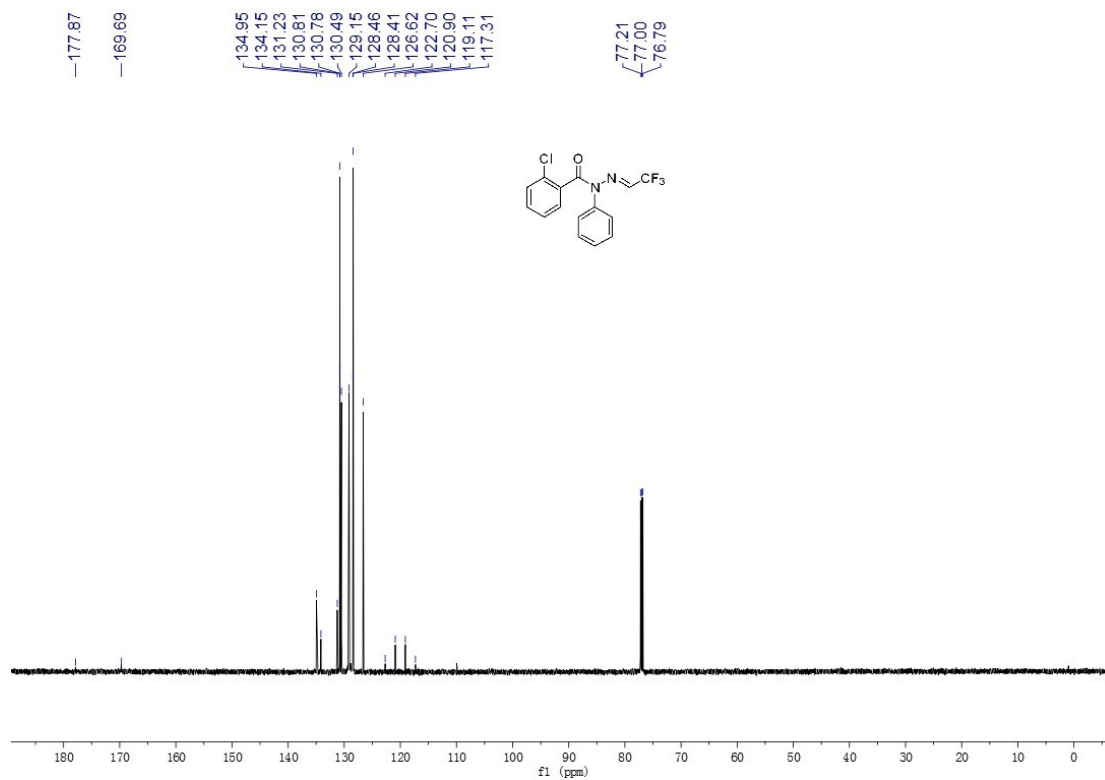

$^{19}\text{F}$  NMR copies of compound **6f**:

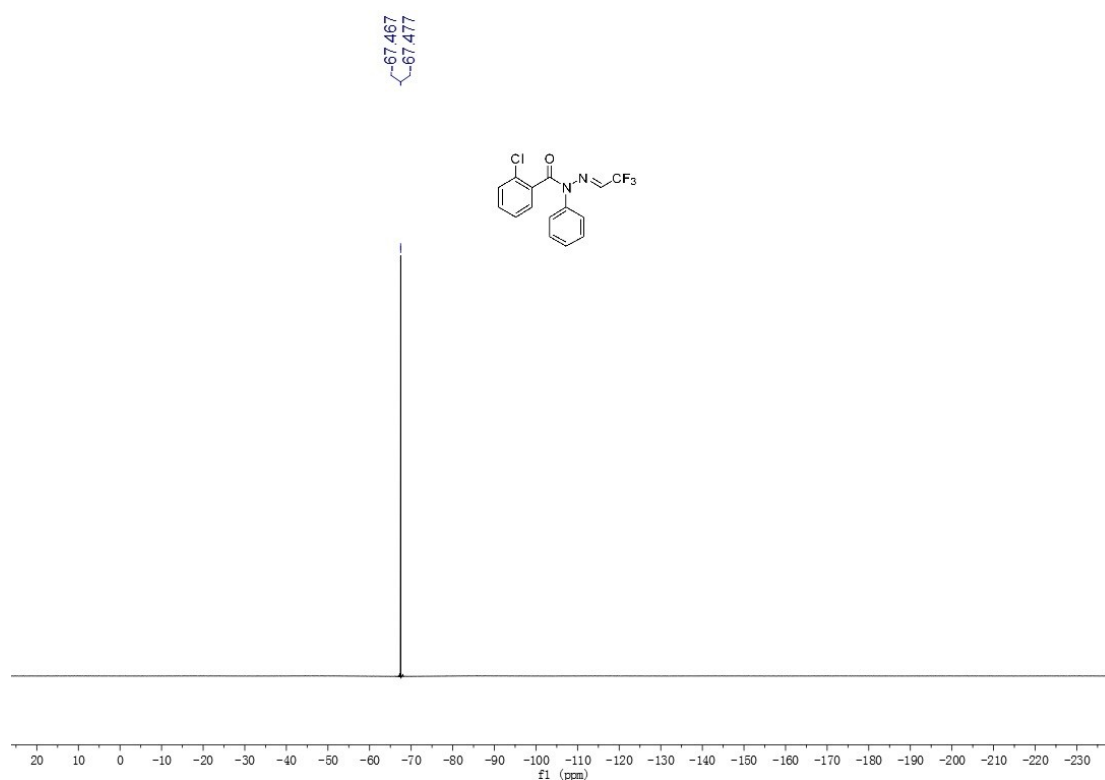

HRMS (ESI) of compound **6f**:

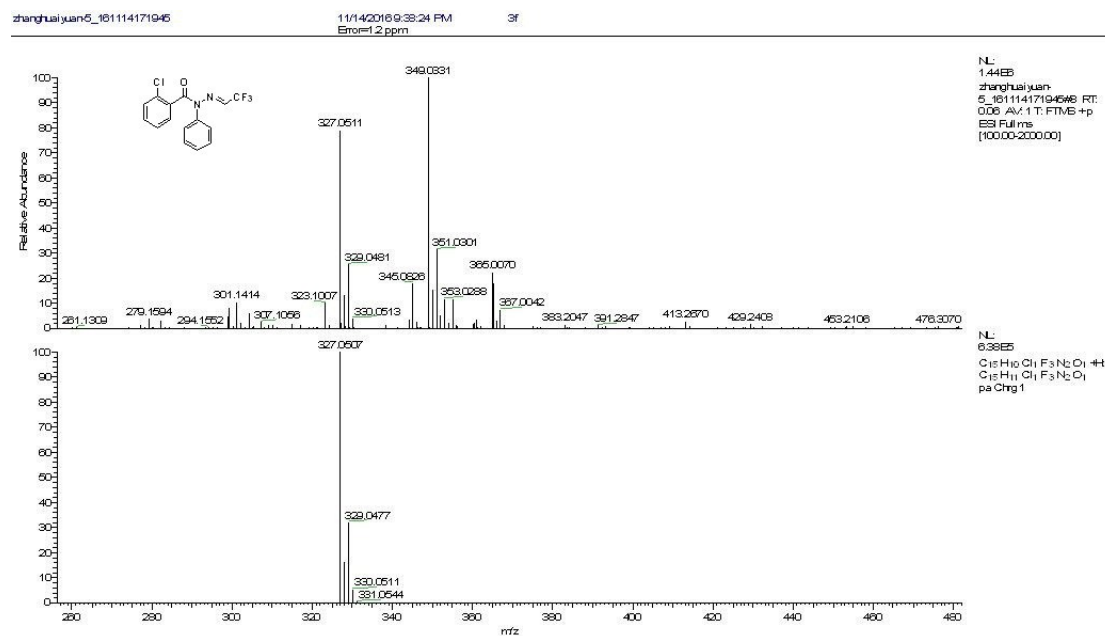

$^1\text{H}$  NMR copies of compound **6g**:

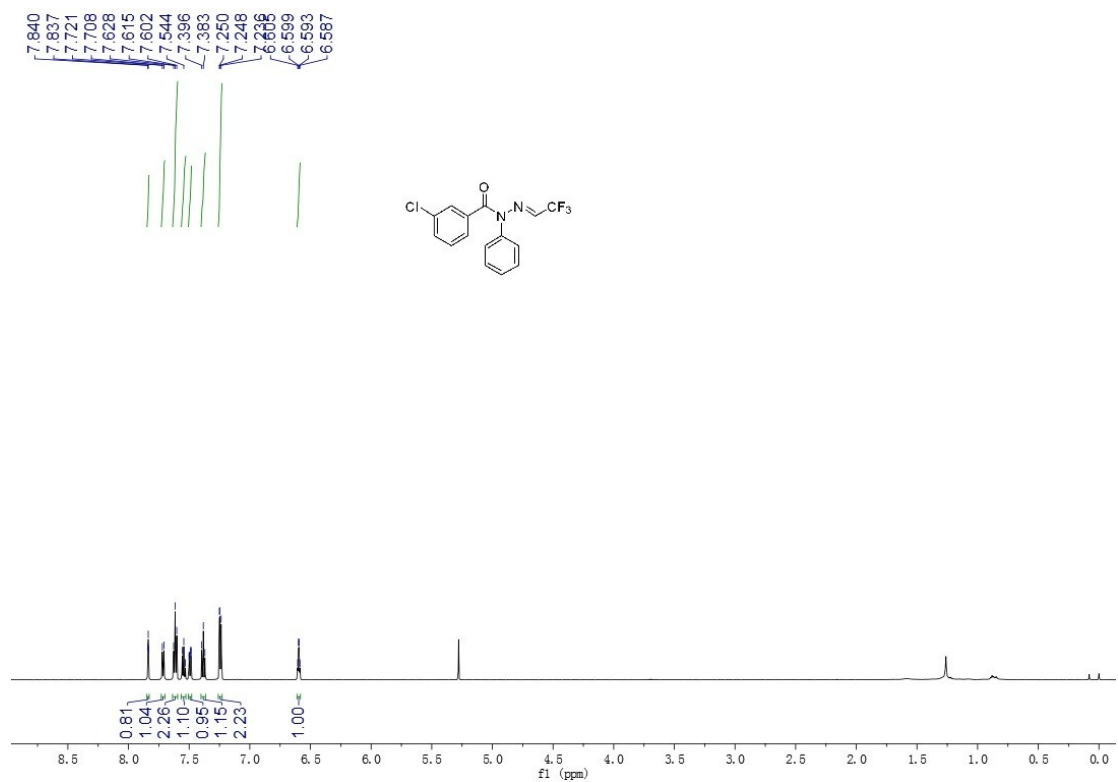

$^{13}\text{C}$  NMR copies of compound **6g**:

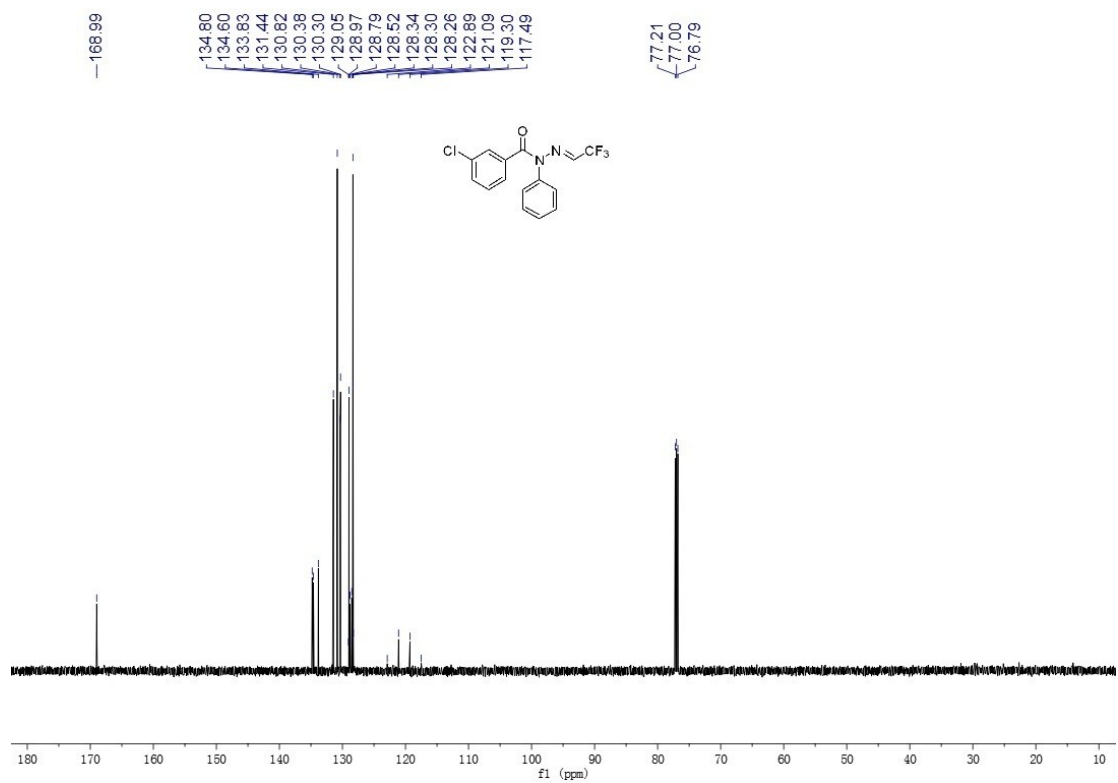

$^{19}\text{F}$  NMR copies of compound **6g**:

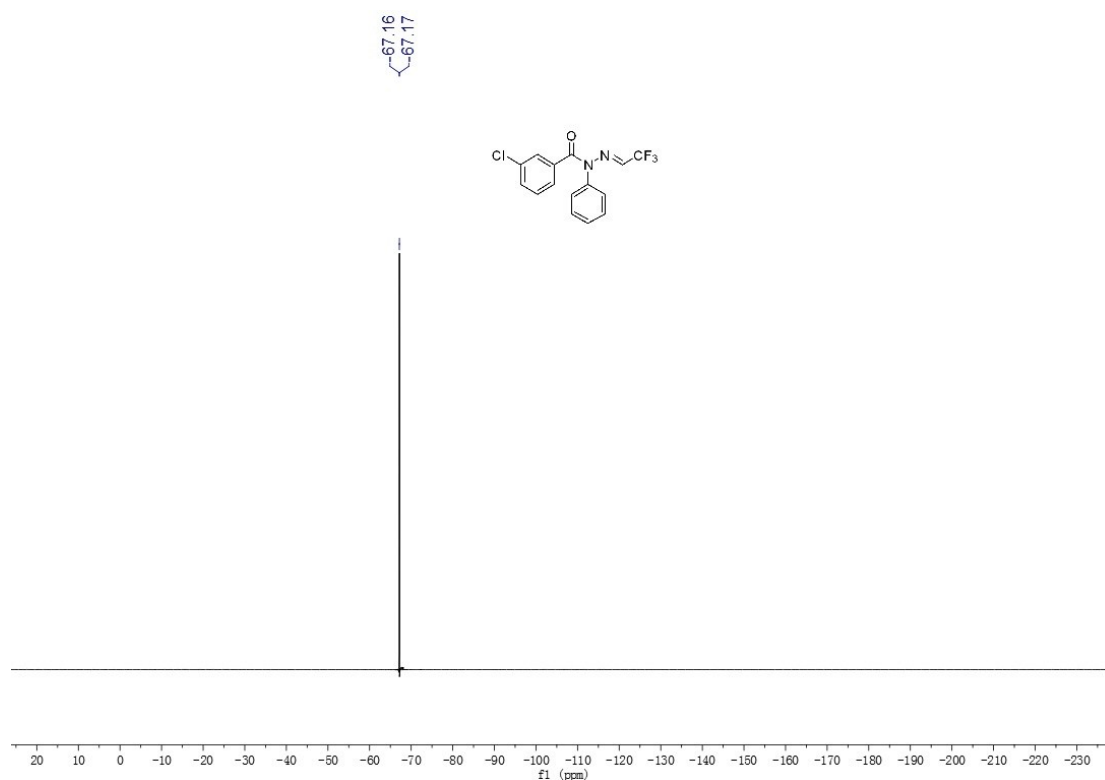

HRMS (ESI) of compound **6g**:

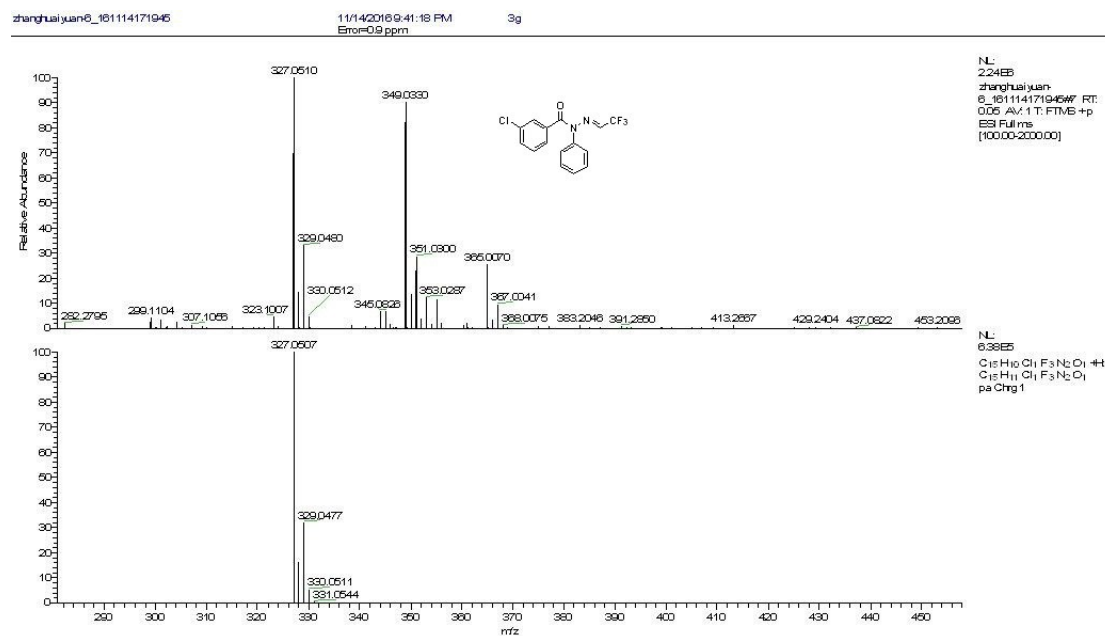

$^1\text{H}$  NMR copies of compound **6h**:

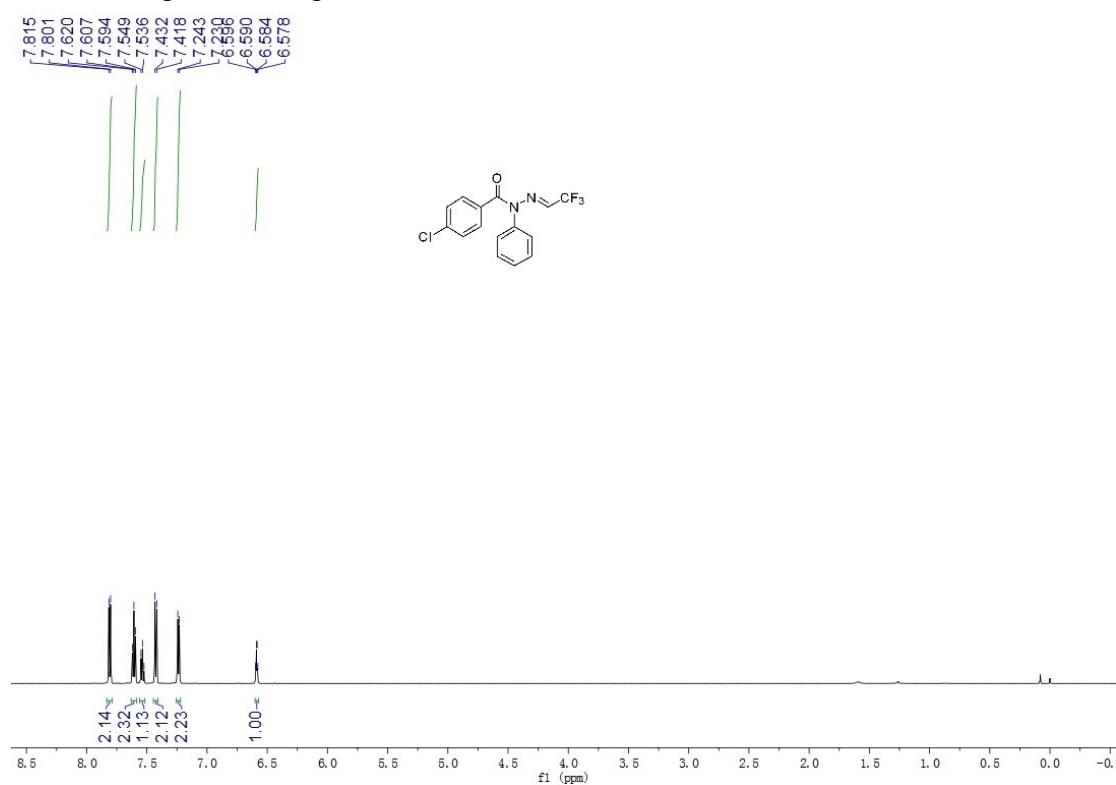

$^{13}\text{C}$  NMR copies of compound **6h**:

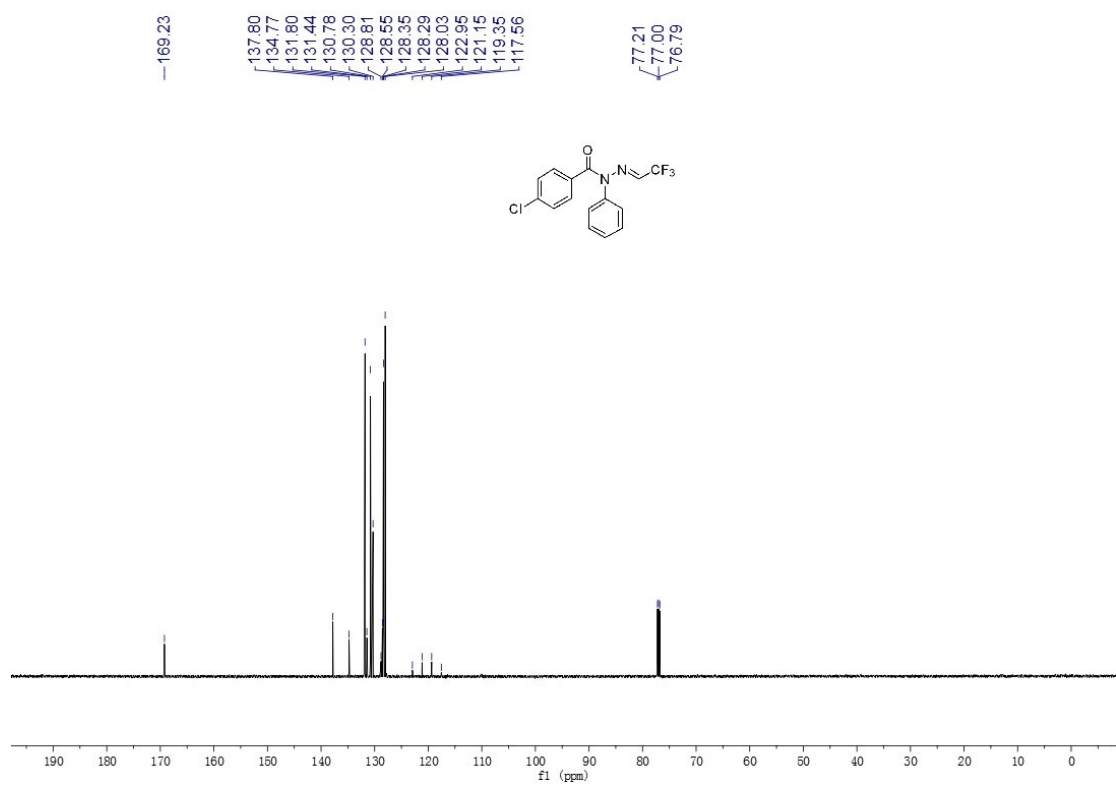

$^{19}\text{F}$  NMR copies of compound **6h**:

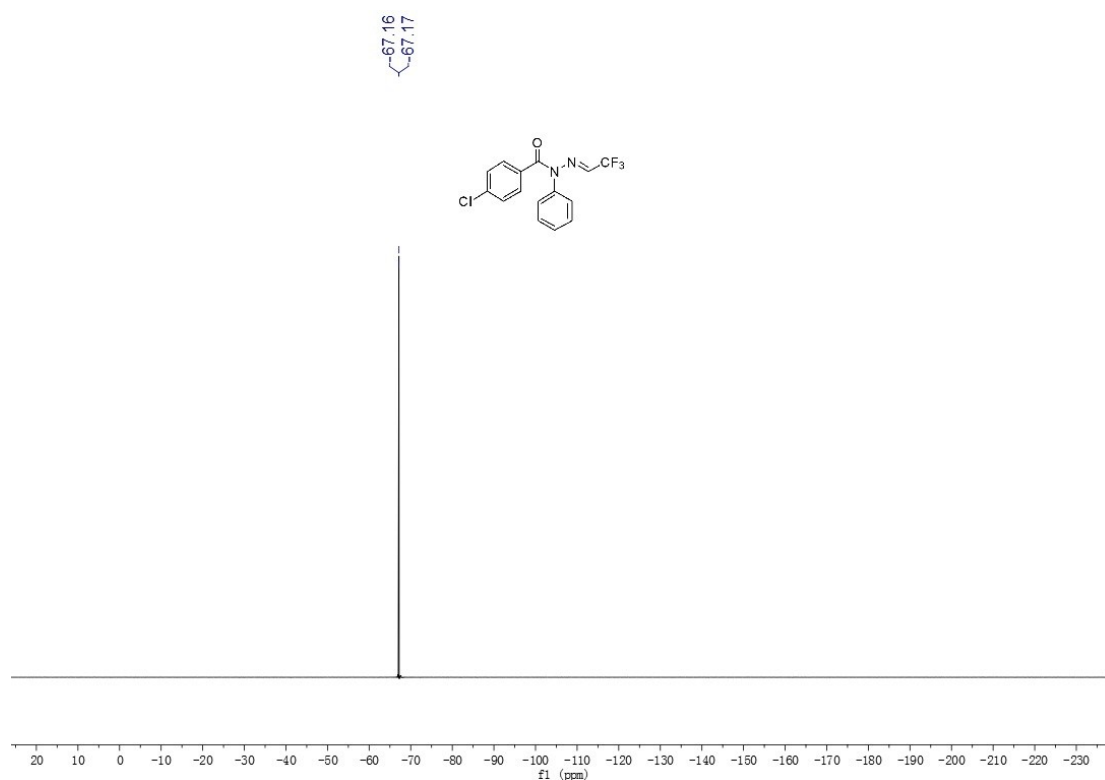

HRMS (ESI) of compound **6h**:

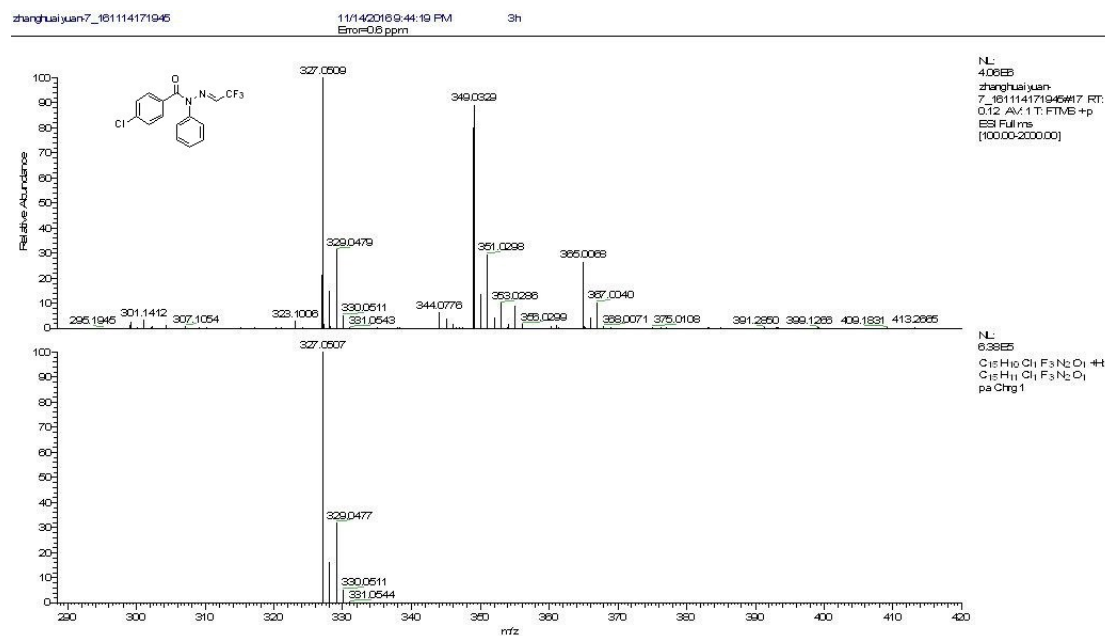

<sup>1</sup>H NMR copies of compound **6i**:

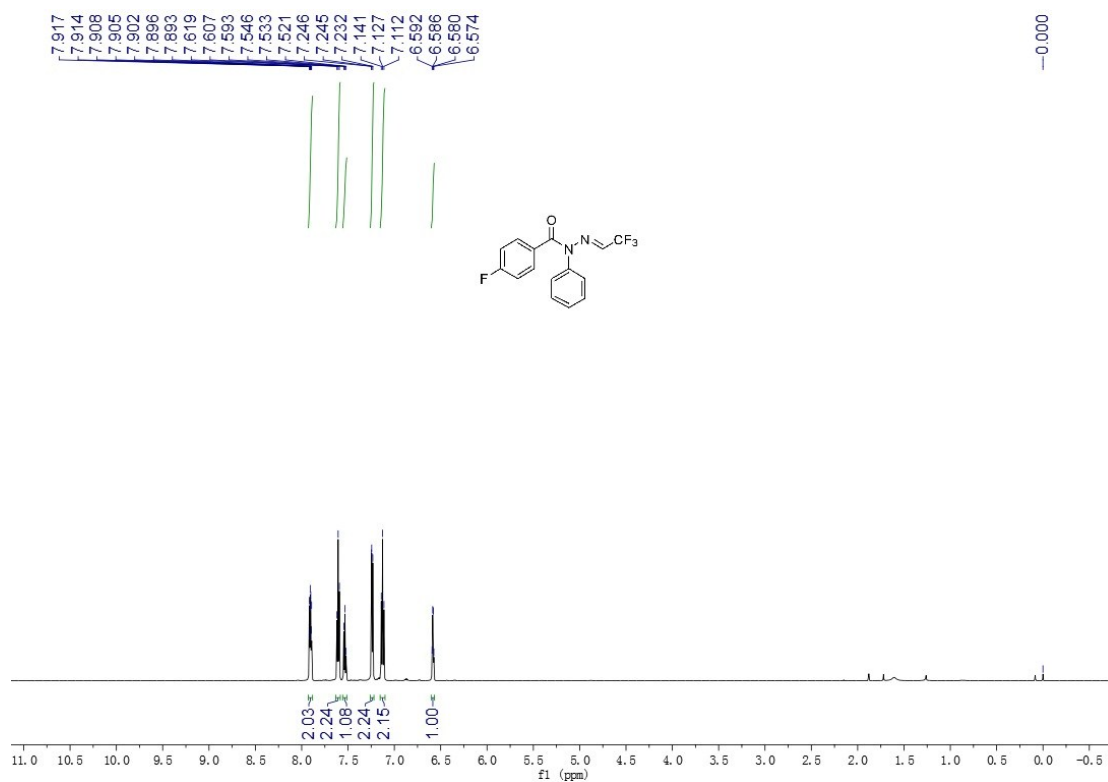

<sup>13</sup>C NMR copies of compound **6i**:

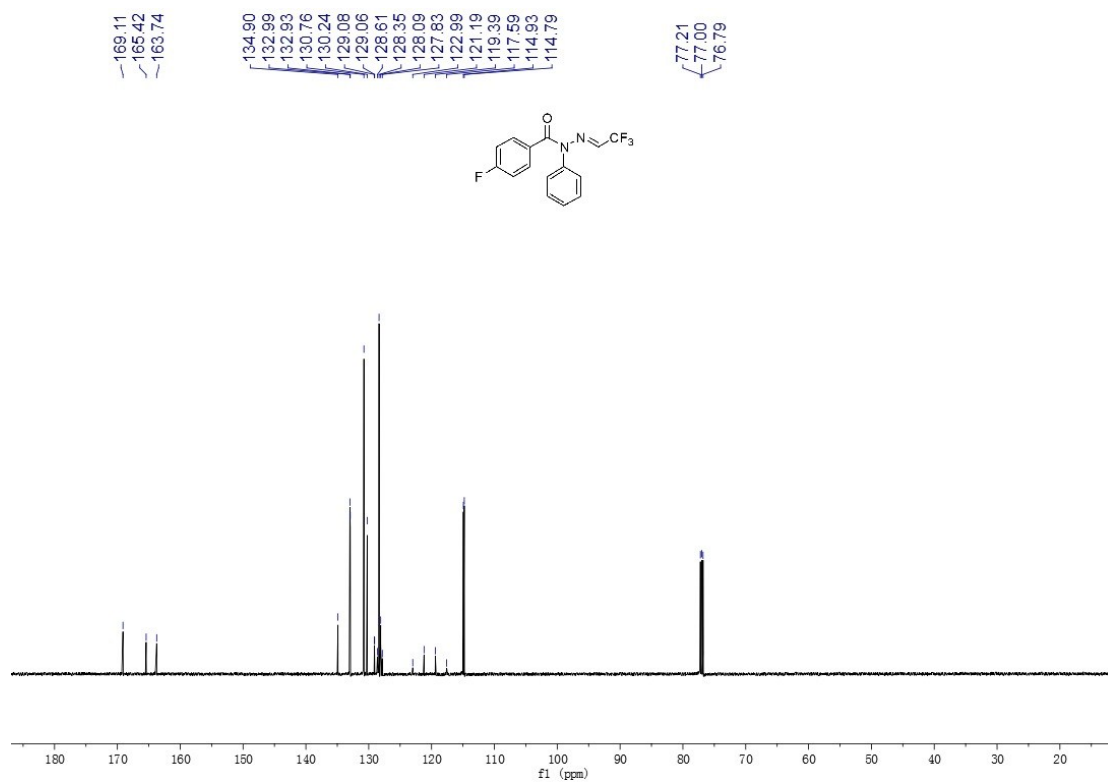

$^{19}\text{F}$  NMR copies of compound **6i**:

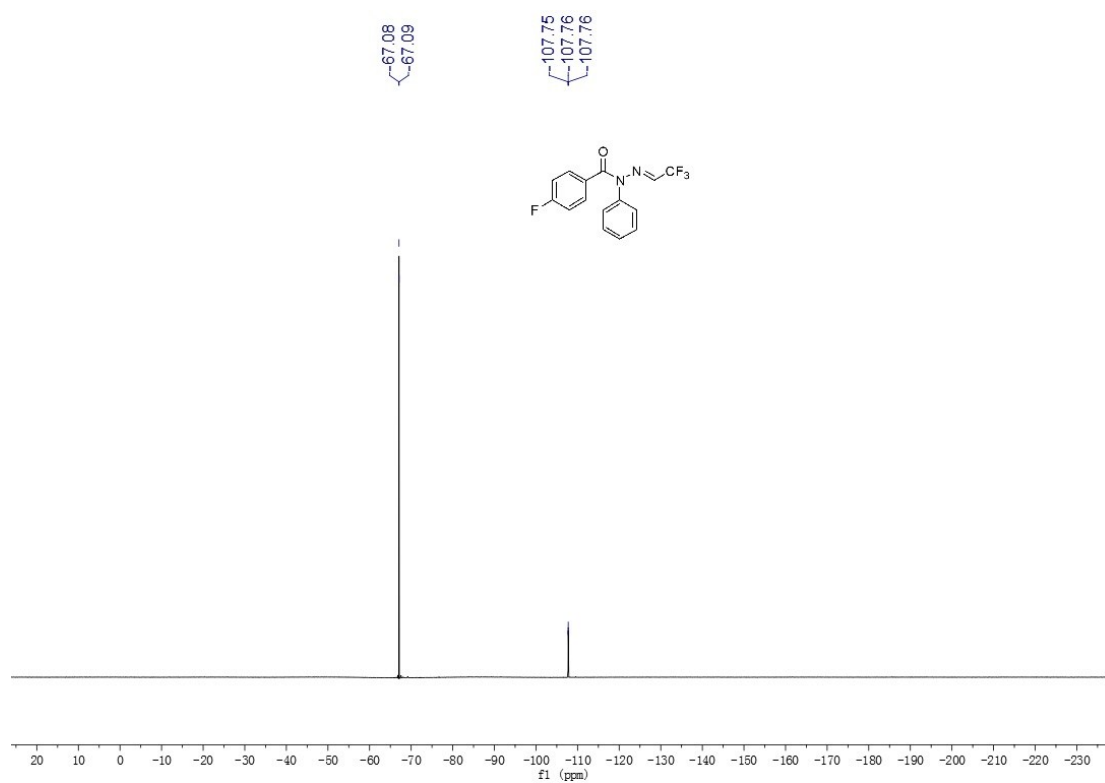

HRMS (ESI) of compound **6i**:

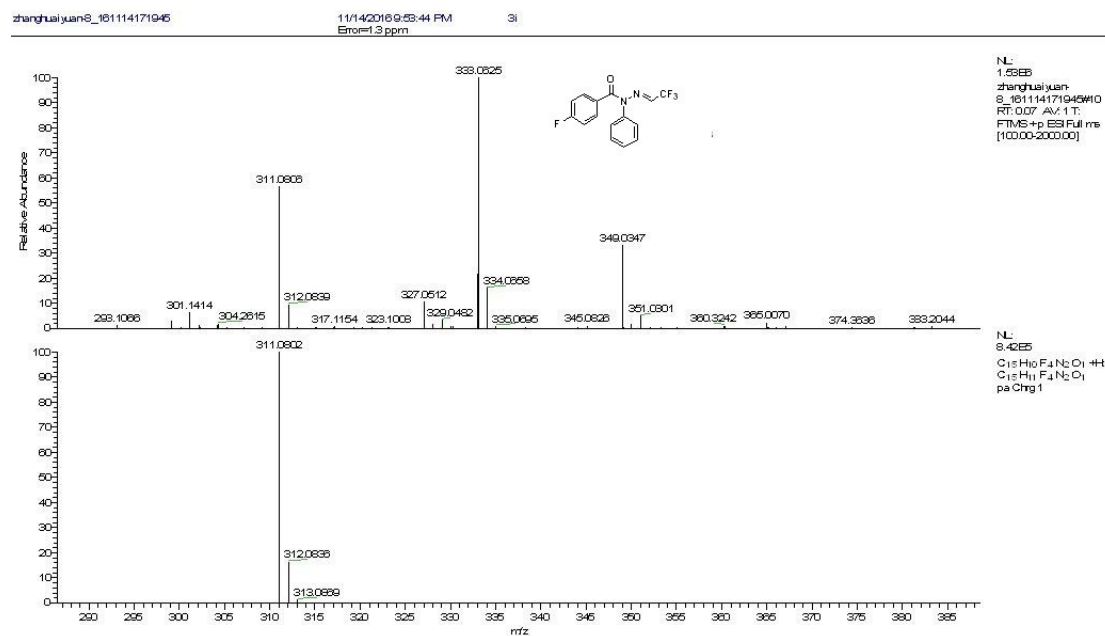

$^1\text{H}$  NMR copies of compound **6j**:

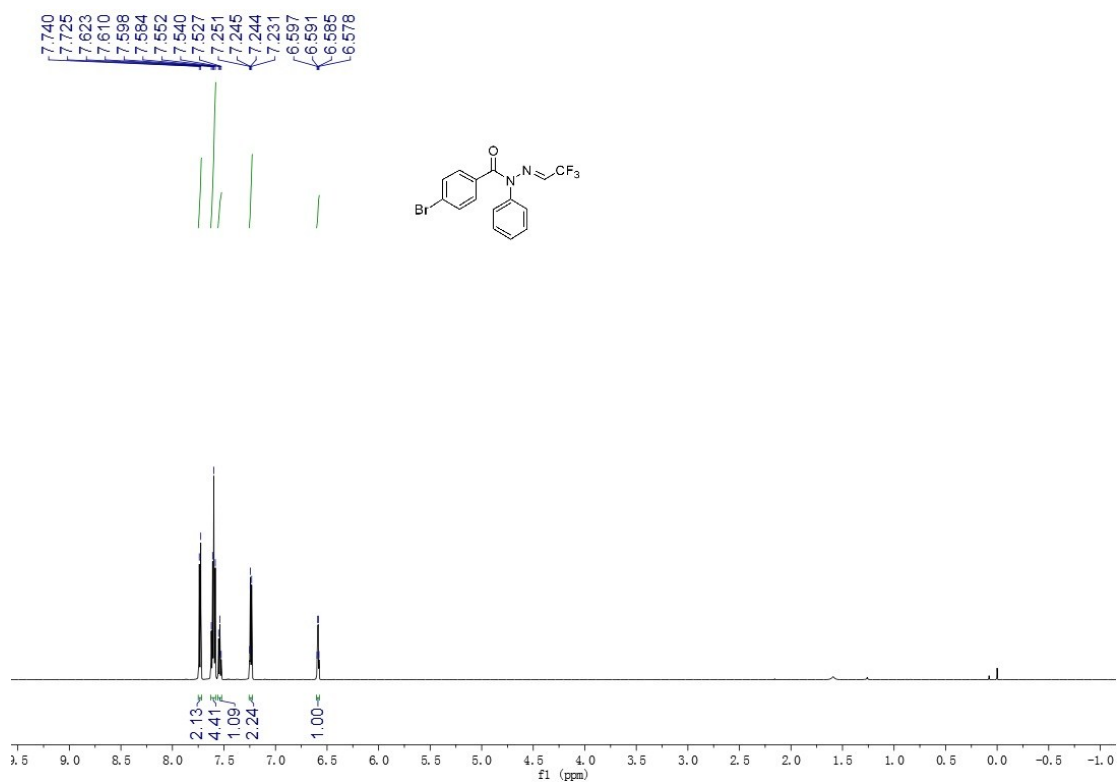

$^{13}\text{C}$  NMR copies of compound **6j**:

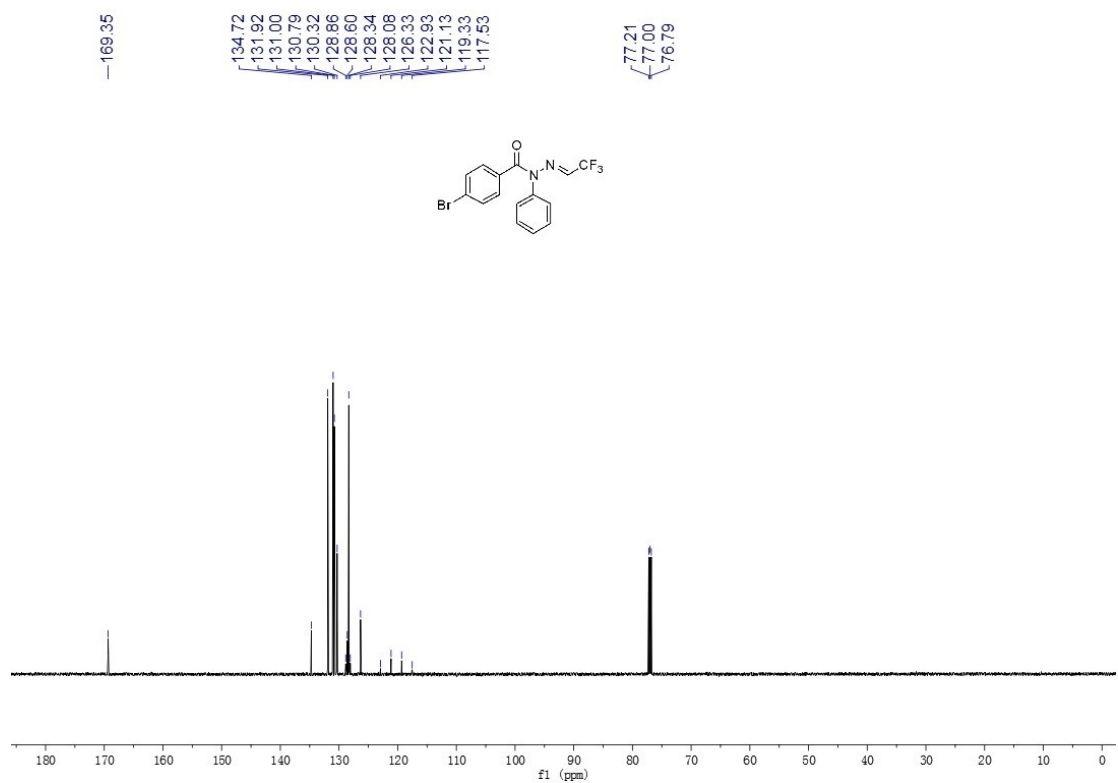

Chemical structure of 4-bromo-N-((E)-2-(trifluoromethyl)vinyl)-2-phenylbenzamide is shown above the spectrum. The structure features a benzamide core with a bromine atom at the 4-position and a phenyl group at the 2-position. The amide nitrogen is substituted with an (E)-2-(trifluoromethyl)vinyl group.

zhanghuiyuan9\_181114171945  
11/14/2018 10:01:52 PM  
Error=1.8 ppm

3)

Chemical structure: BrC1=CC=C(C=C1)C(=O)N(C2=CC=CC=C2)N=C(F)F

Mass spectrum (Top):

- Y-axis: Relative Abundance (0 to 100)
- X-axis: m/z (355 to 430)
- Major peaks: 371.0007, 372.9986, 392.9827, 394.9804, 408.9565, 410.9544

Mass spectrum (Bottom):

- Y-axis: Relative Abundance (0 to 100)
- X-axis: m/z (355 to 430)
- Major peaks: 371.0001, 372.9981, 374.0014, 375.0048, 376.0124

Calculated mass: 427.05

Formula:  $C_{15}H_{10}BrF_3N_2O_1 + H$

Calculated mass: 427.05

Formula:  $C_{15}H_{10}BrF_3N_2O_1$

pa Chng 1

<sup>1</sup>H NMR copies of compound **6k**:

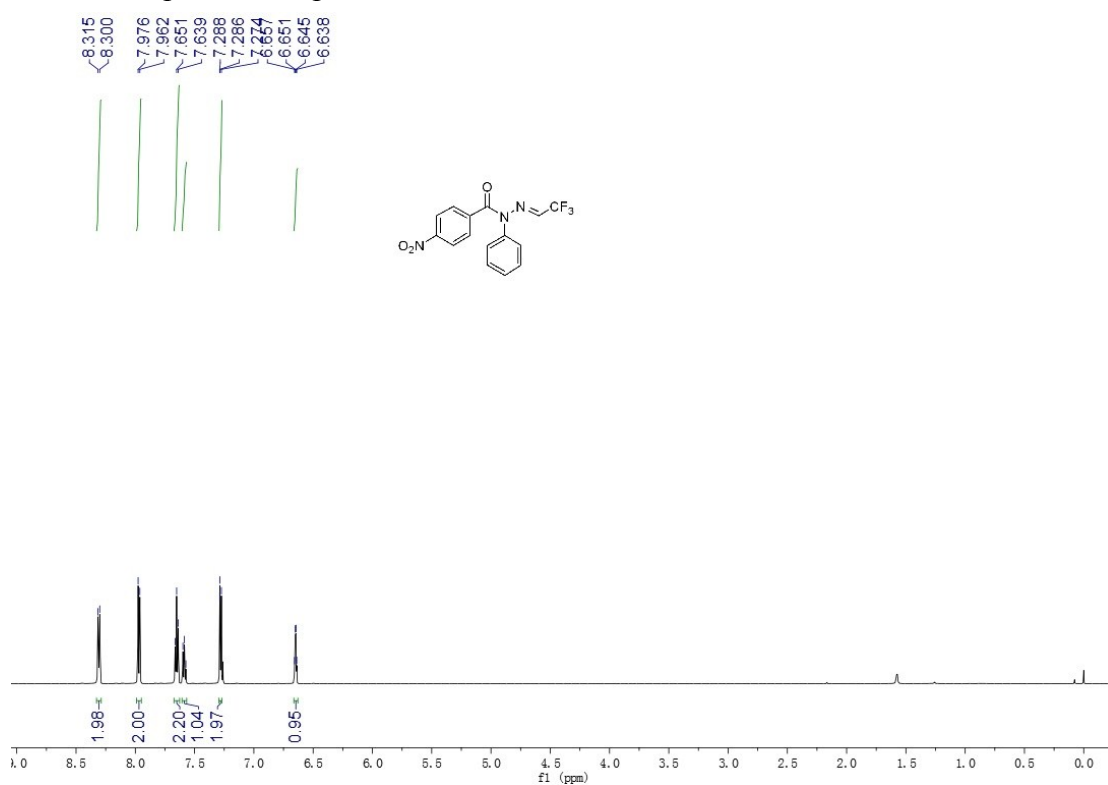

<sup>13</sup>C NMR copies of compound **6k**:

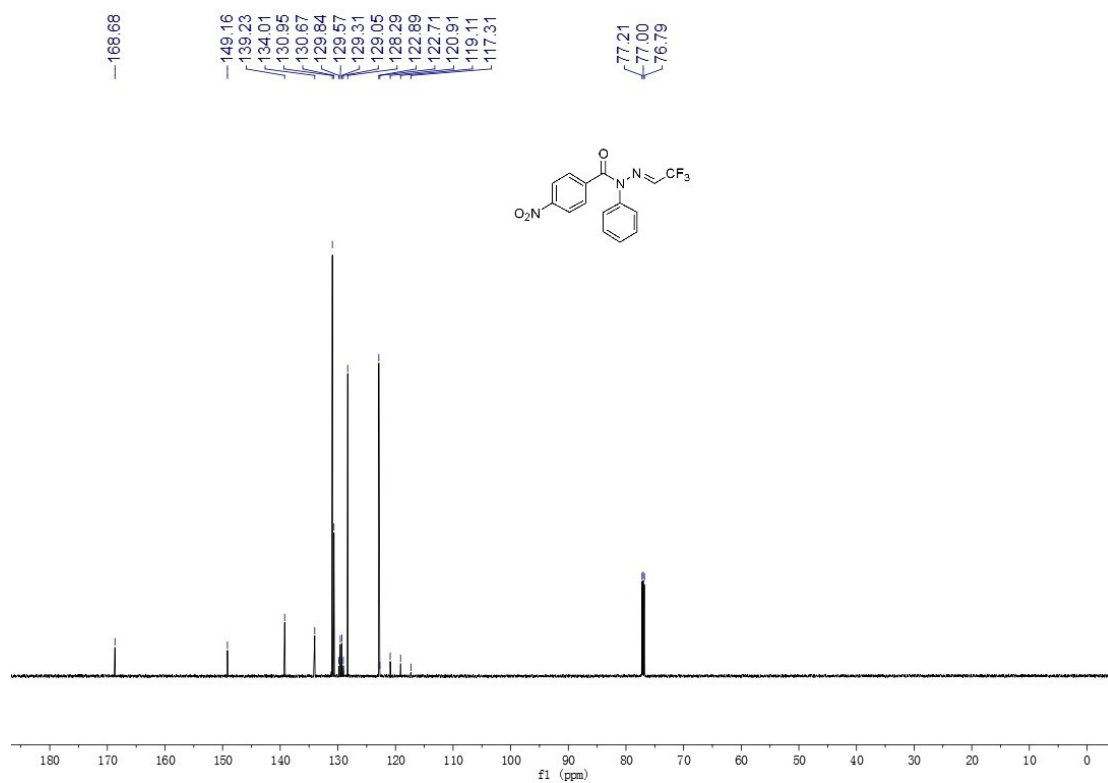

$^{19}\text{F}$  NMR copies of compound **6k**:

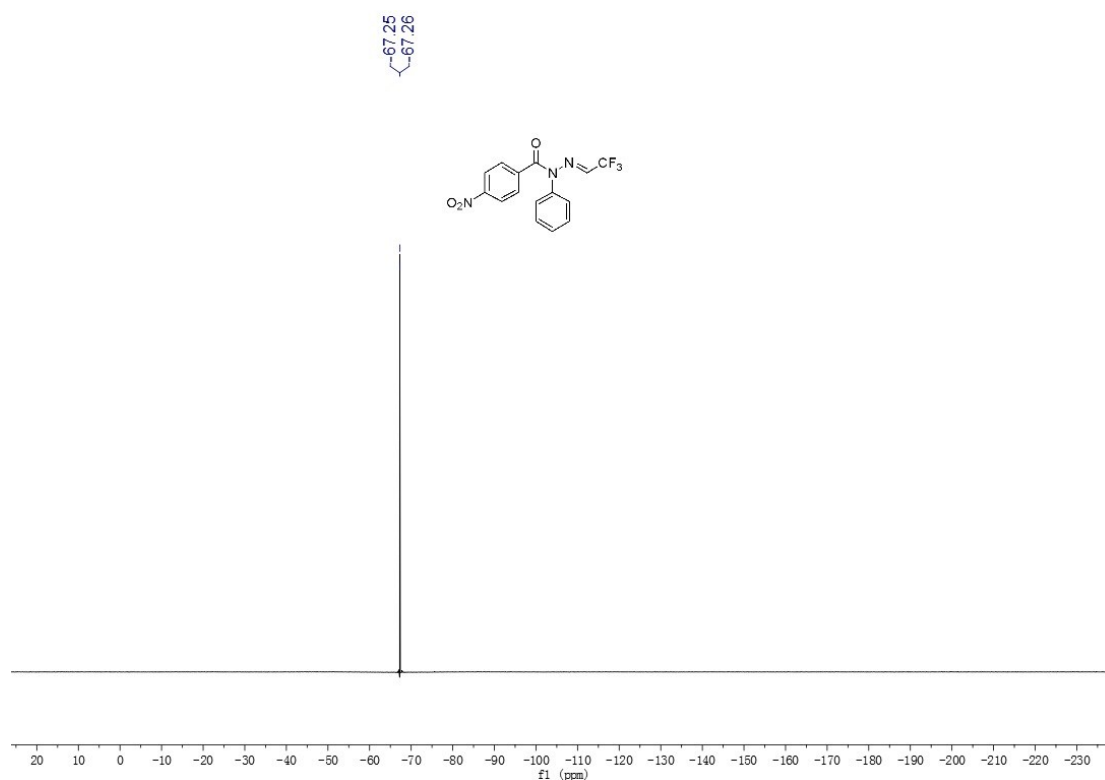

HRMS (ESI) of compound **6k**:

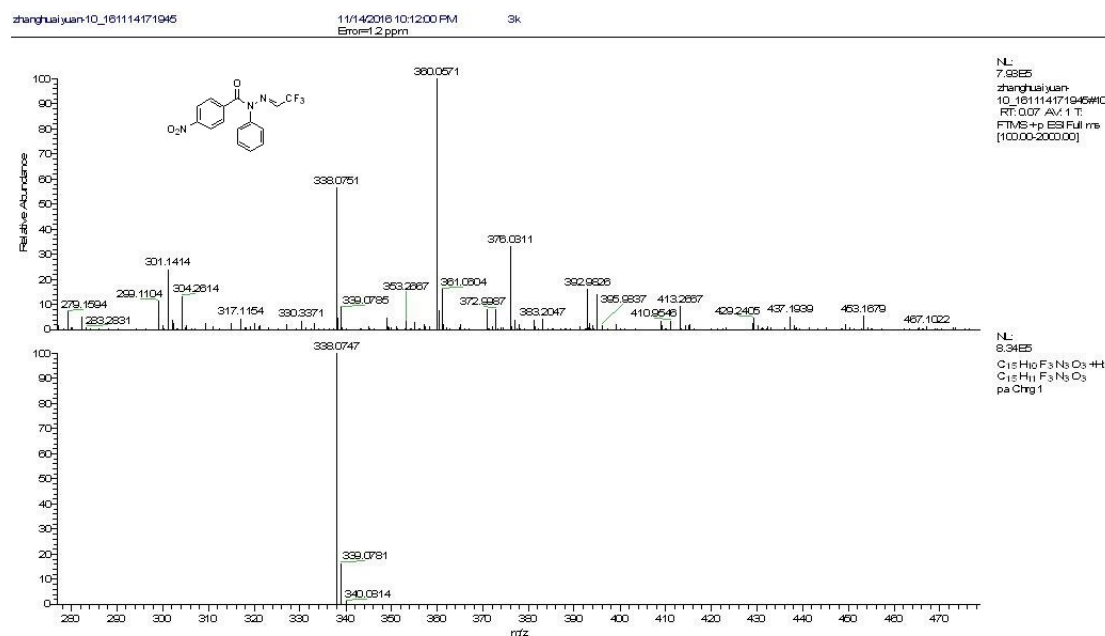

<sup>1</sup>H NMR copies of compound **6l**:

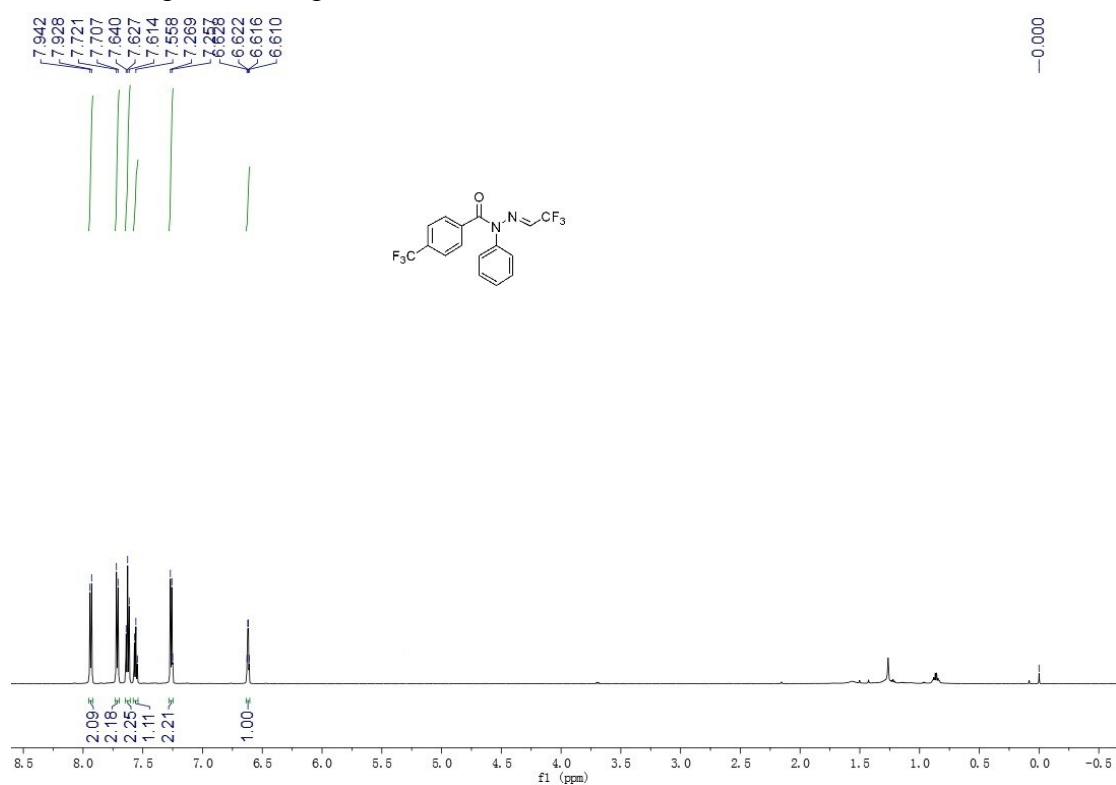

<sup>13</sup>C NMR copies of compound **6l**:

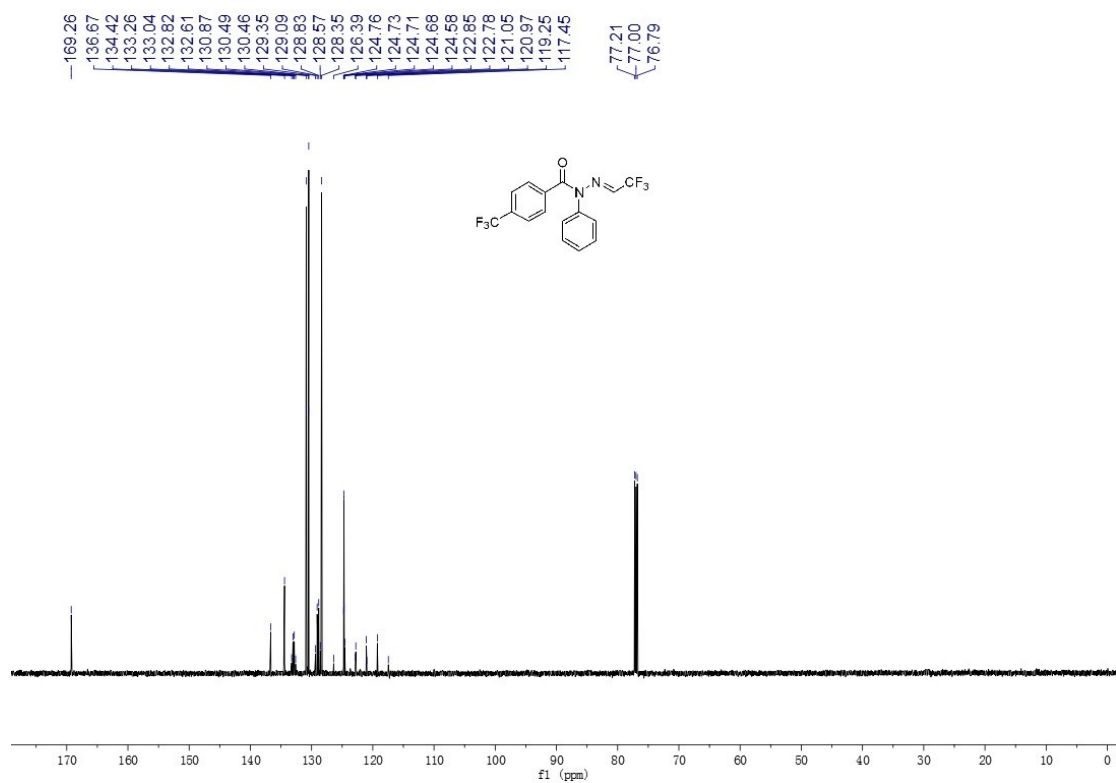

$^{19}\text{F}$  NMR copies of compound **6l**:

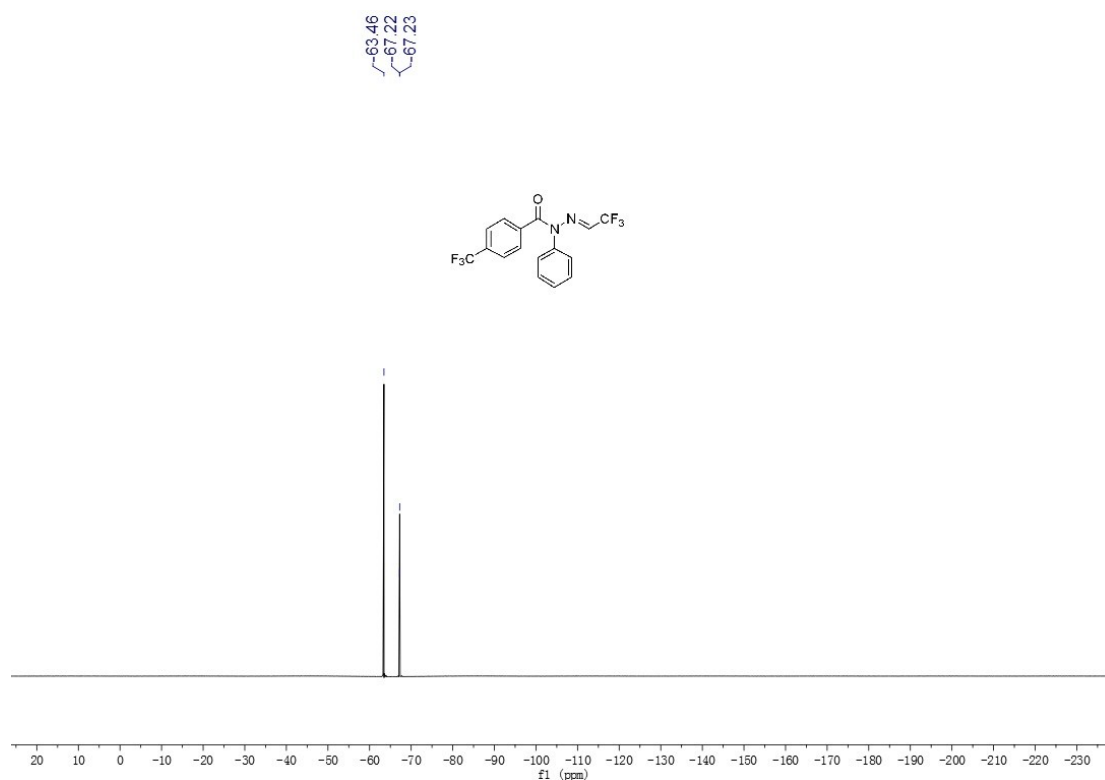

HRMS (ESI) of compound **6l**:

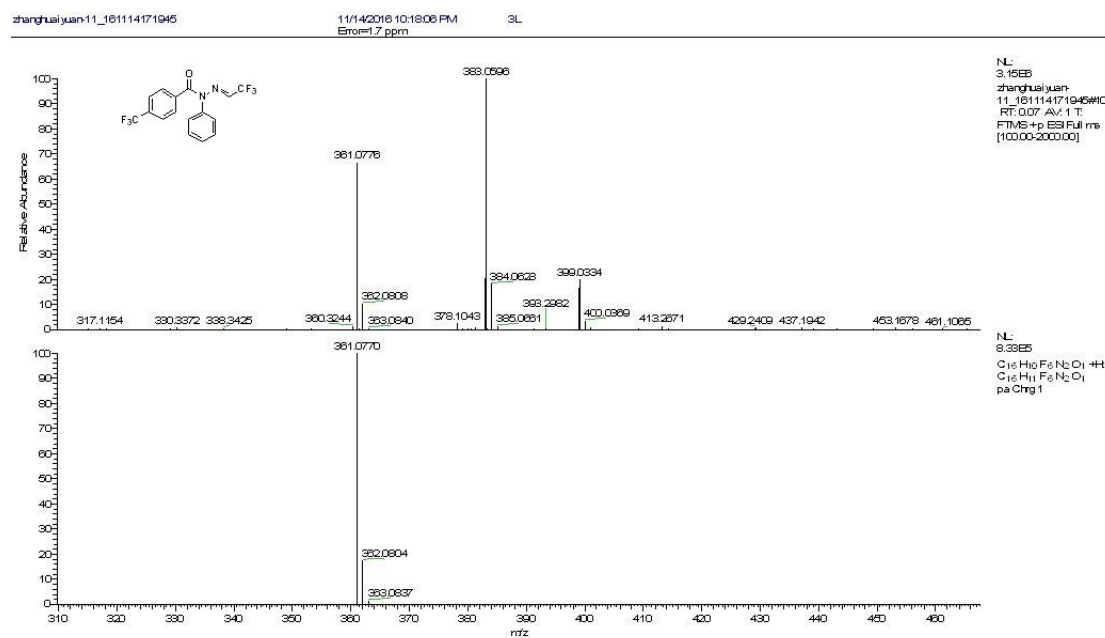

$^1\text{H}$  NMR copies of compound **6m**:

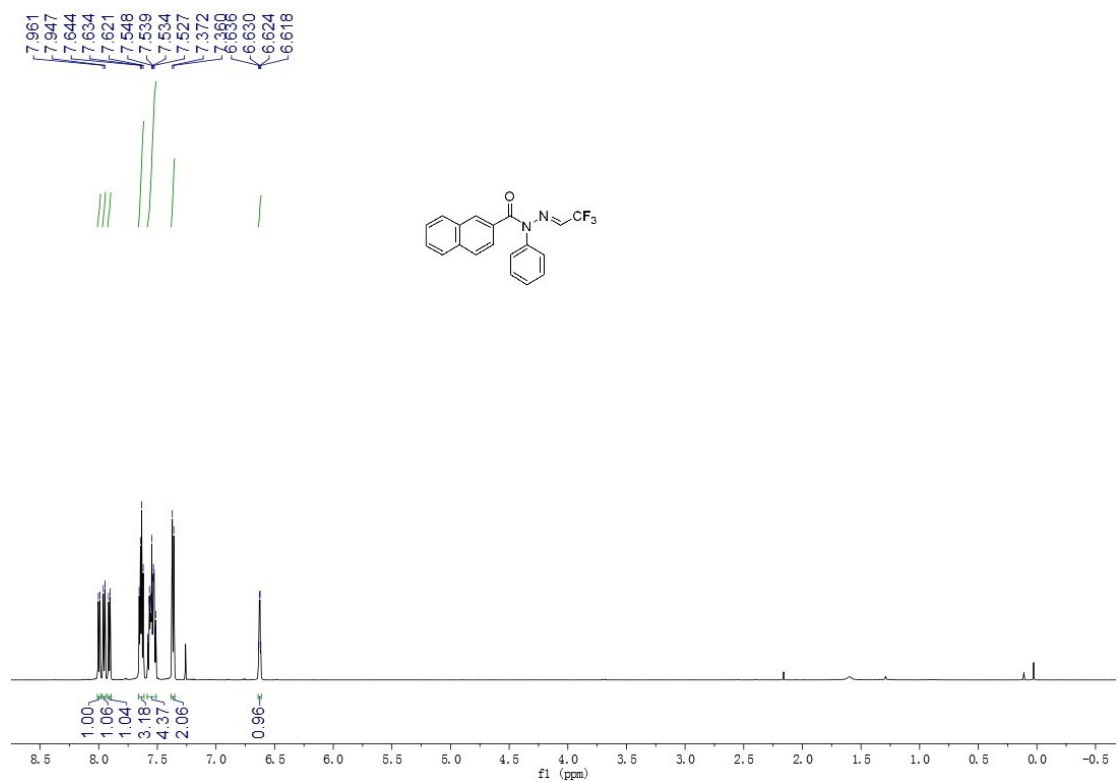

$^{13}\text{C}$  NMR copies of compound **6m**:

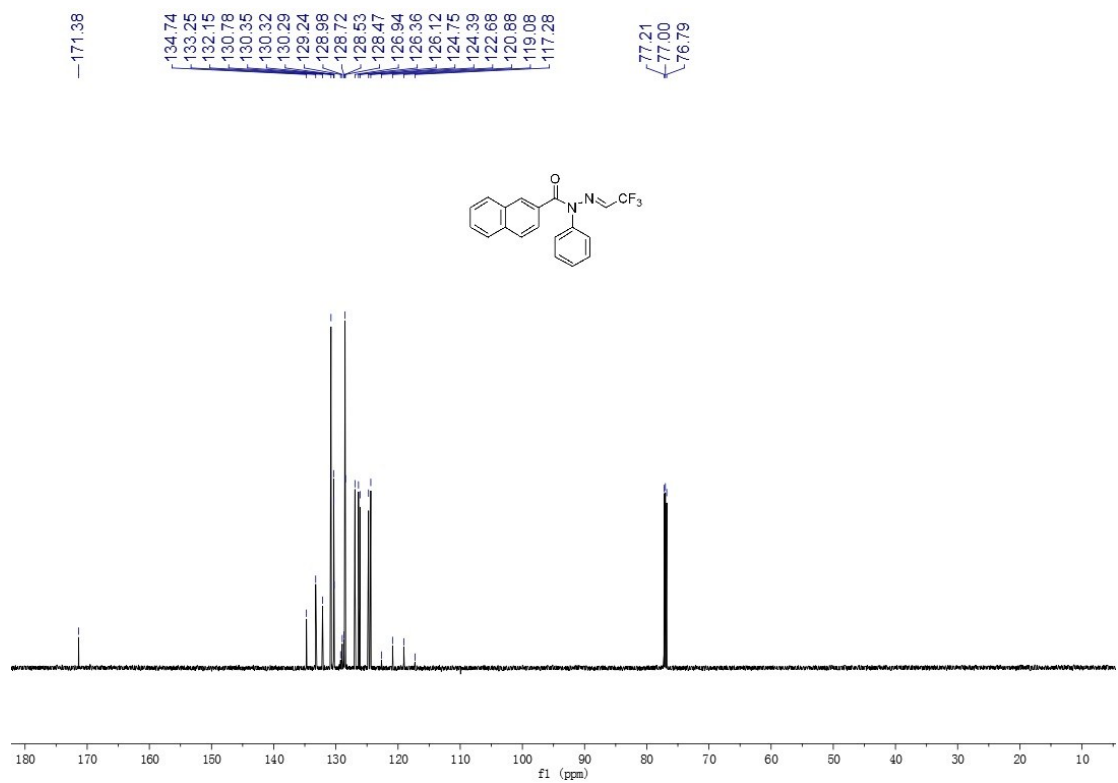

$^{19}\text{F}$  NMR copies of compound **6m**:

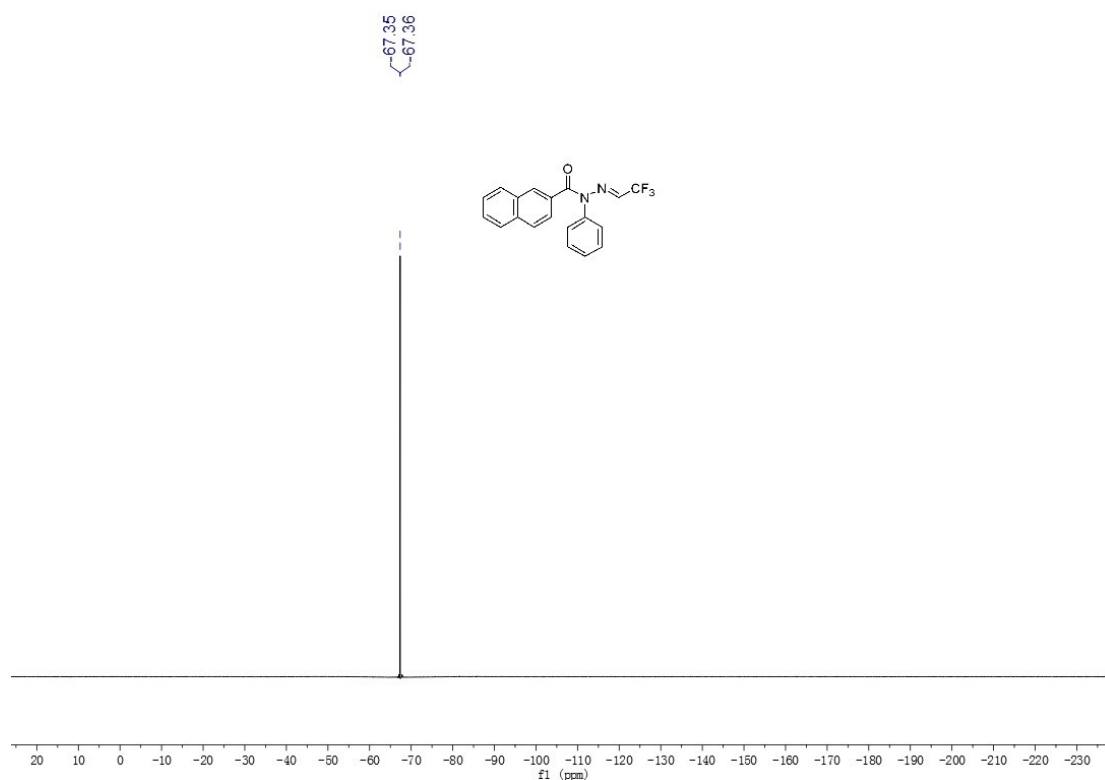

HRMS (ESI) of compound **6m**:

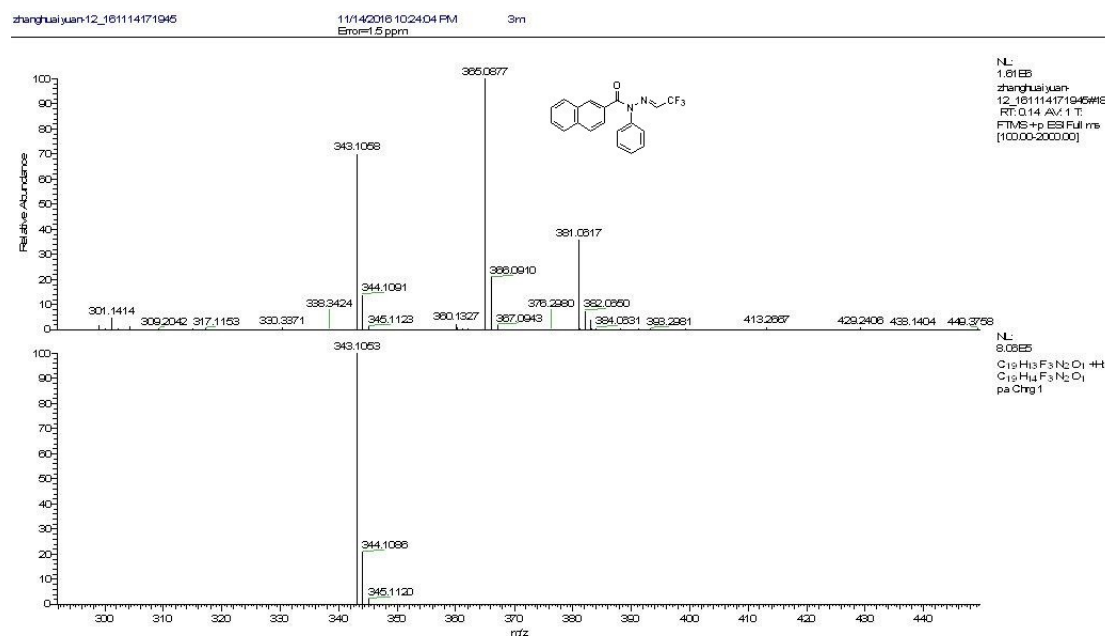

<sup>1</sup>H NMR copies of compound **6n**:

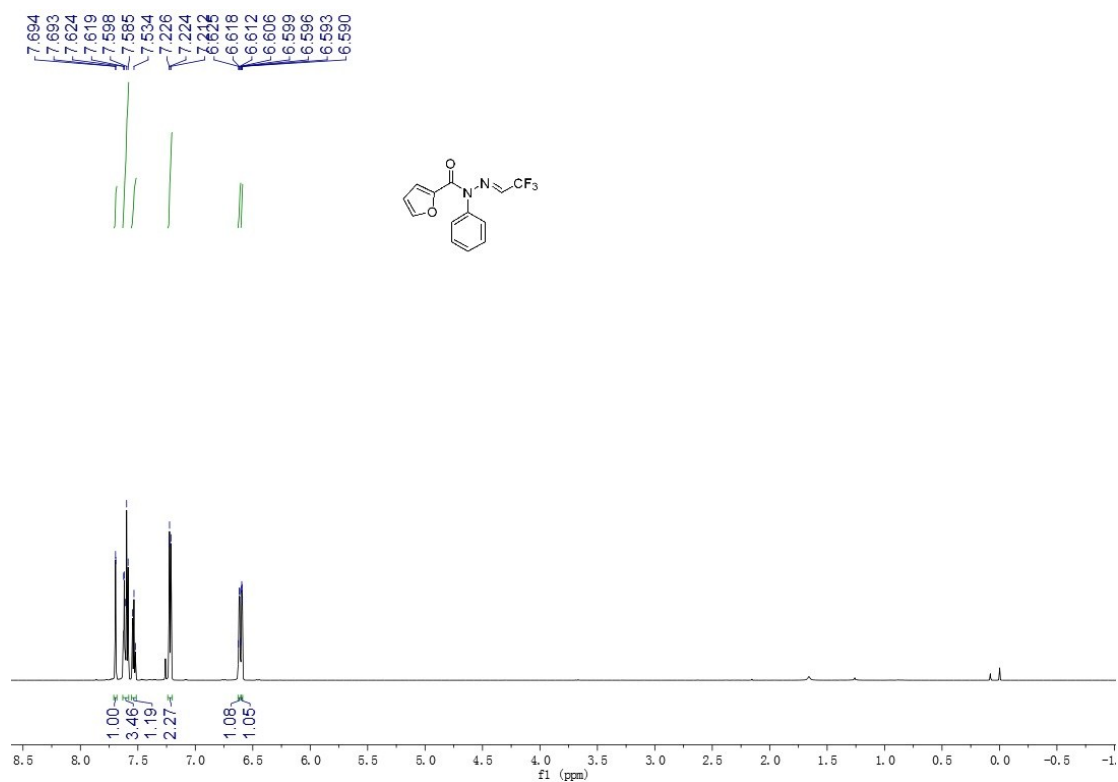

<sup>13</sup>C NMR copies of compound **6n**:

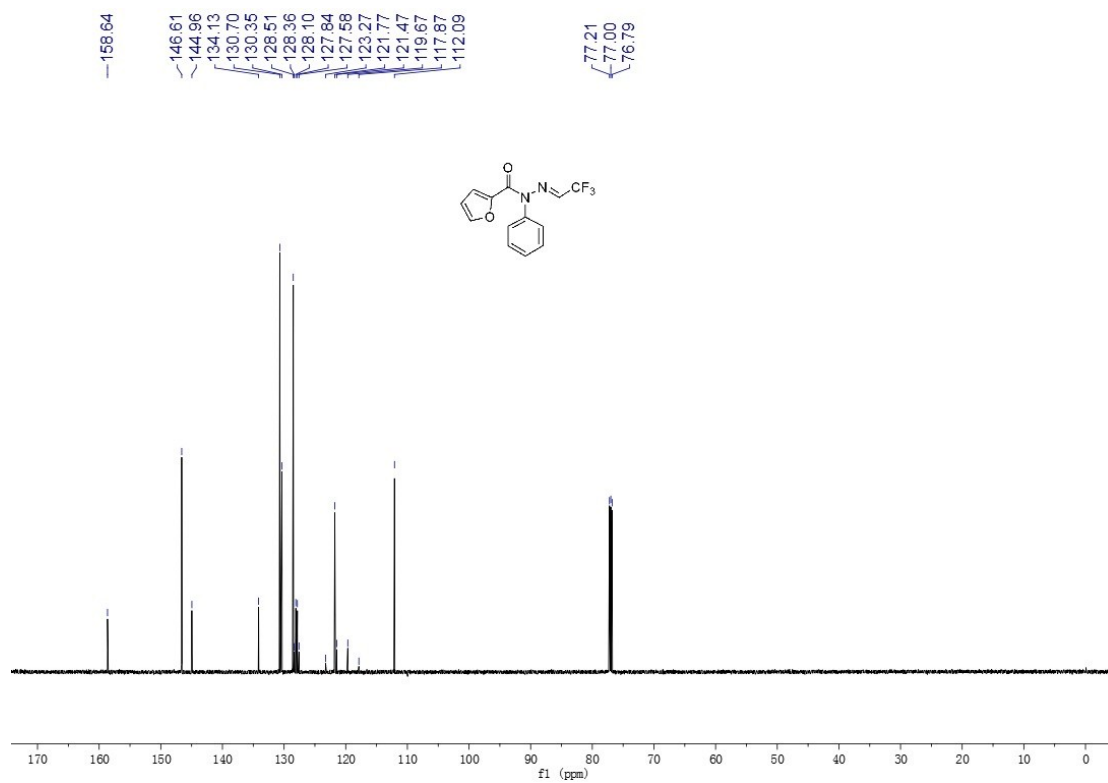

$^{19}\text{F}$  NMR copies of compound **6n**:

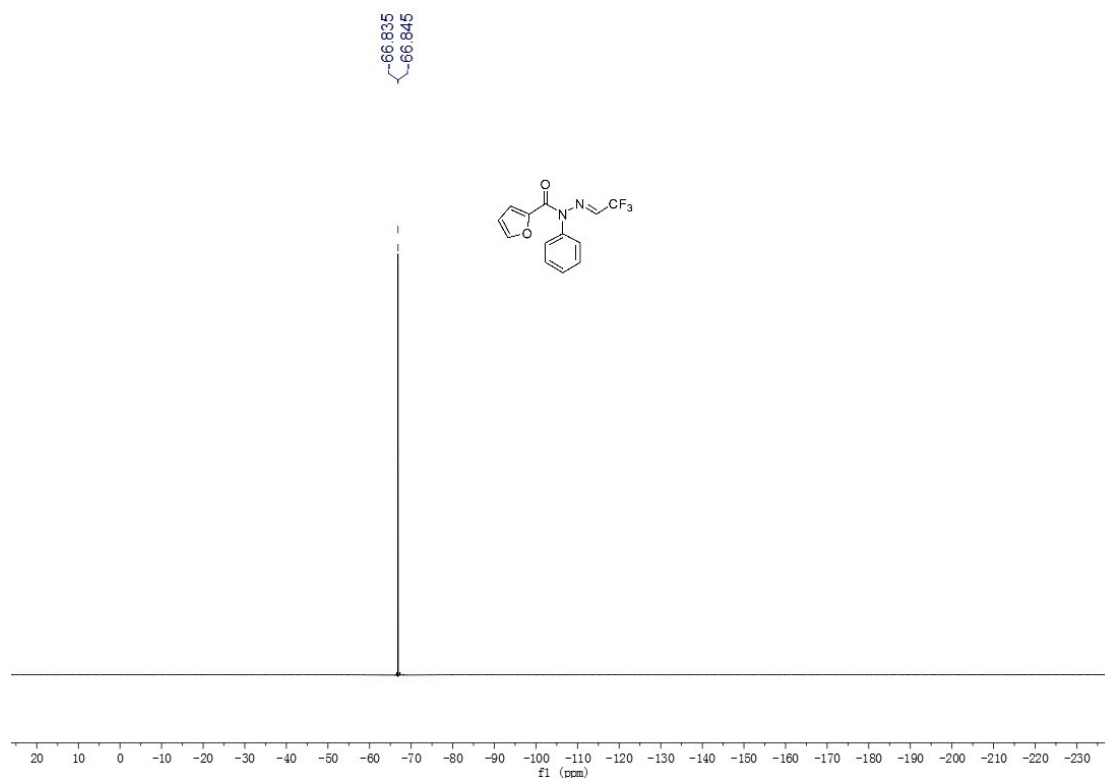

HRMS (ESI) of compound **6n**:

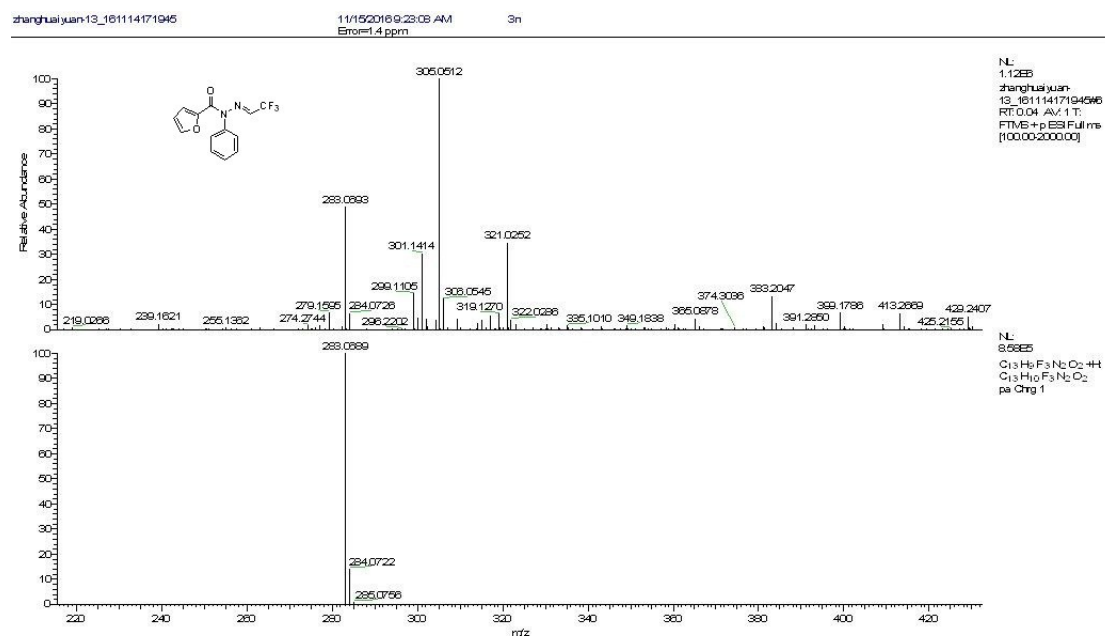

$^1\text{H}$  NMR copies of compound **6o**:

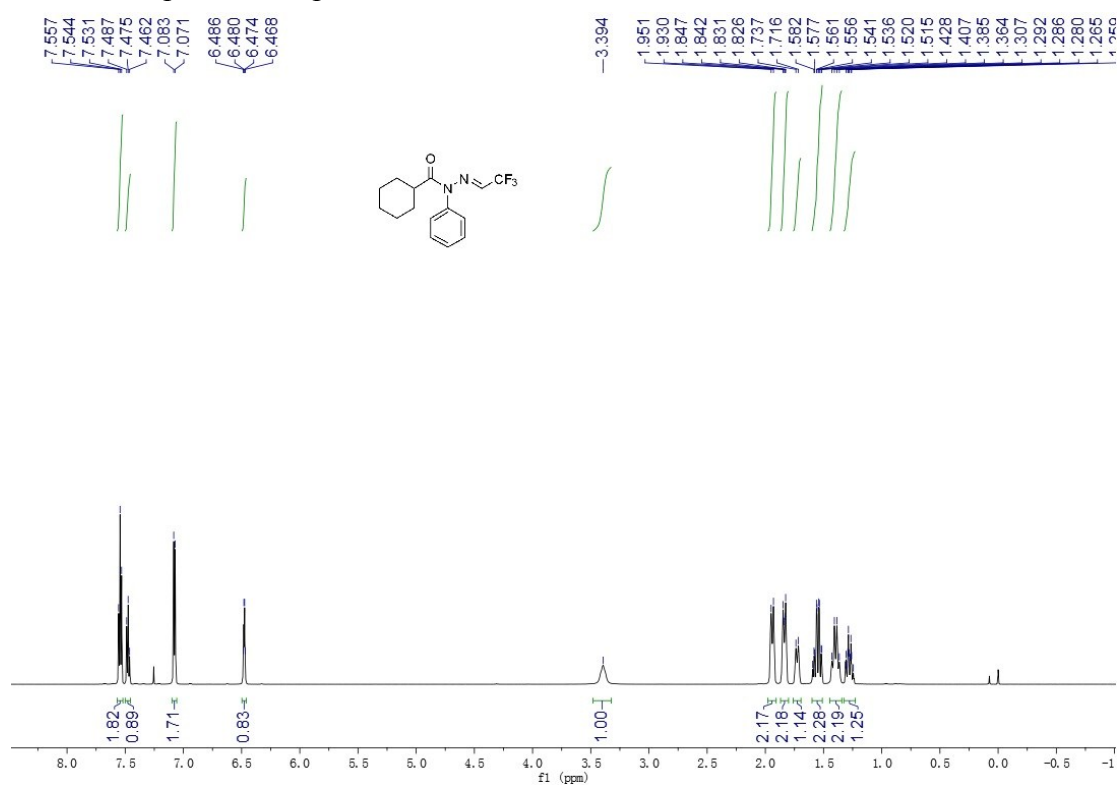

$^{13}\text{C}$  NMR copies of compound **6o**:

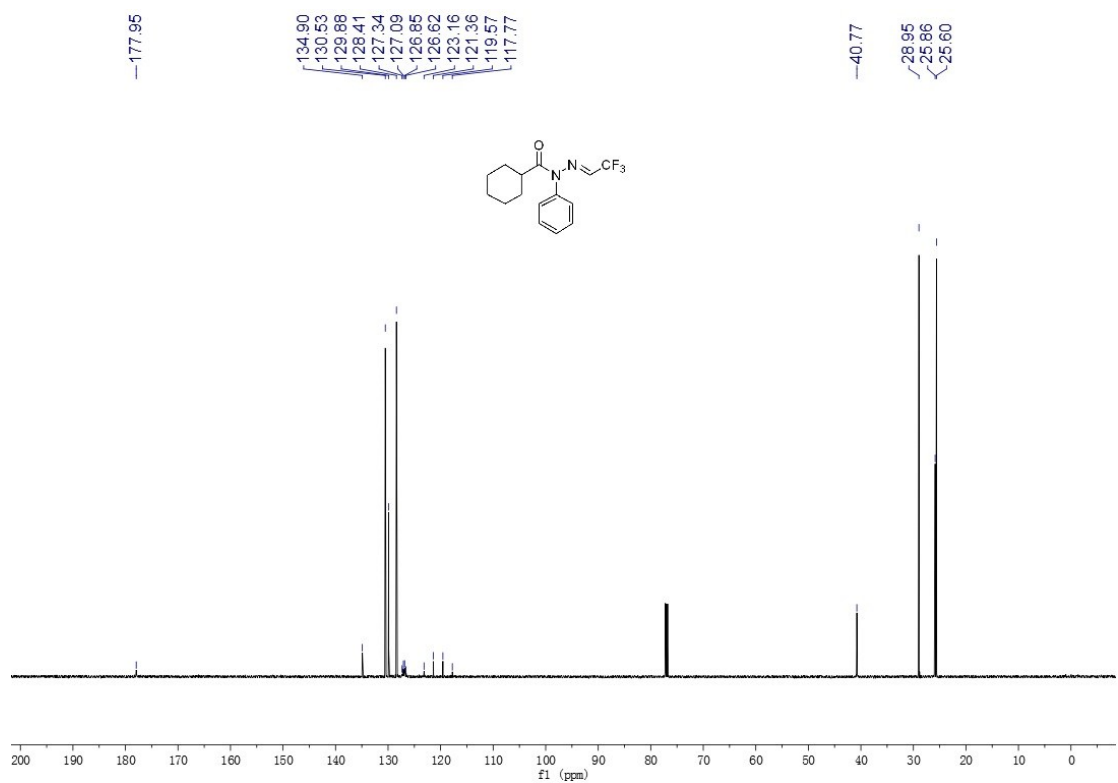

$^{19}\text{F}$  NMR copies of compound **6o**:

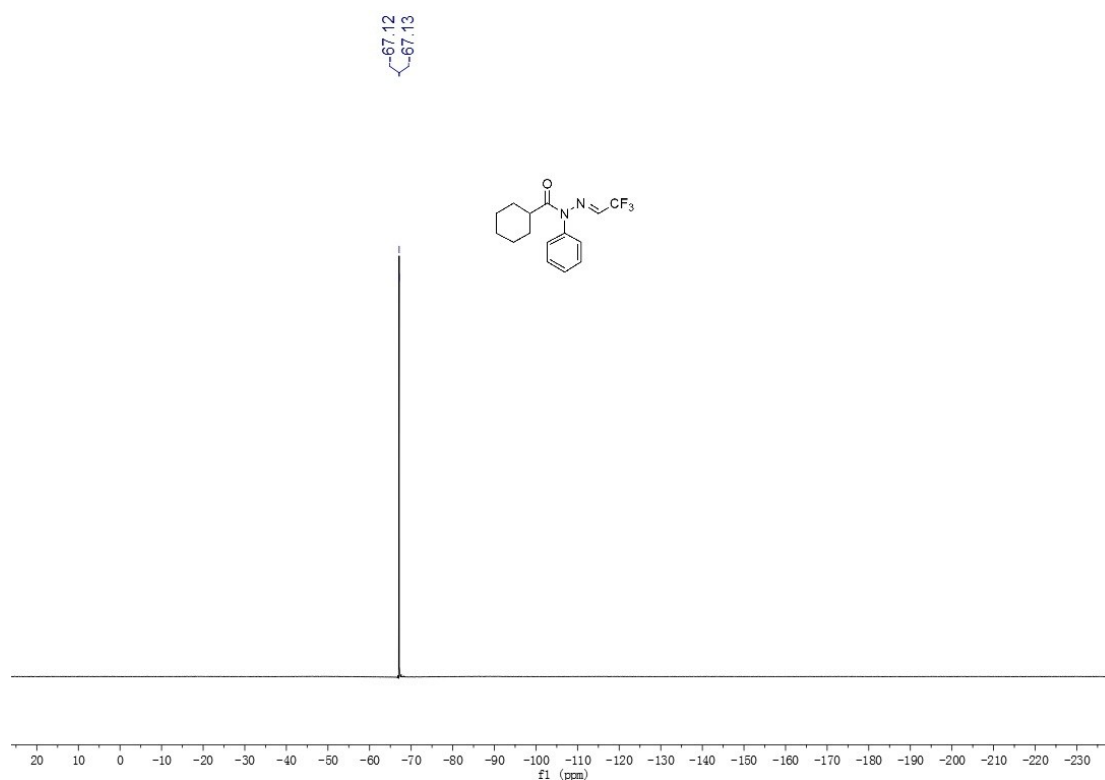

HRMS (ESI) of compound **6o**:

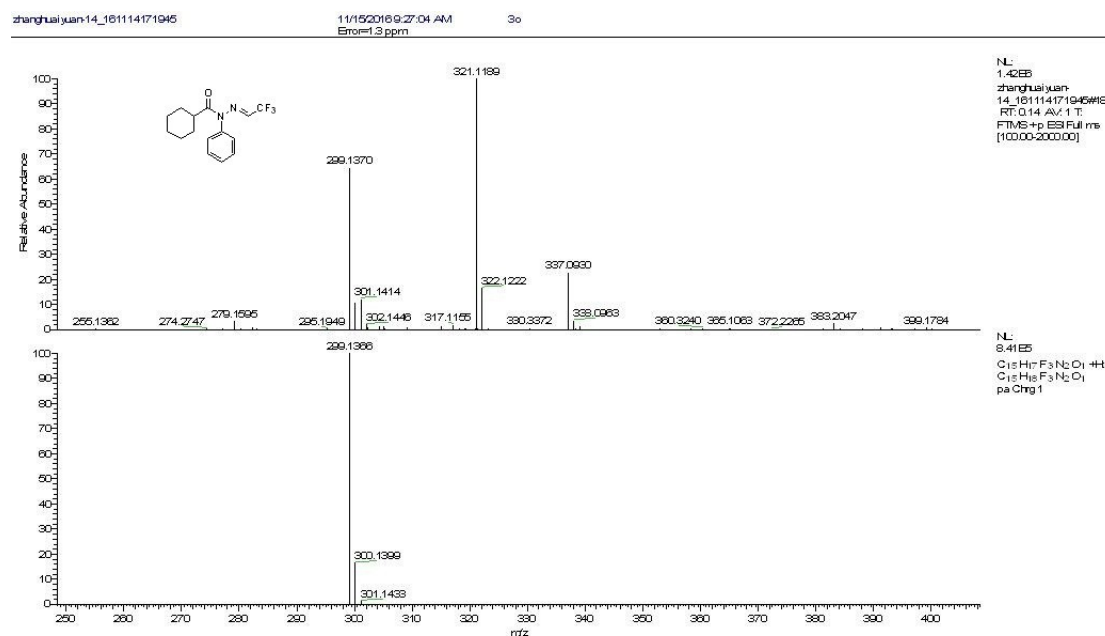

$^1\text{H}$  NMR copies of compound **6p**:

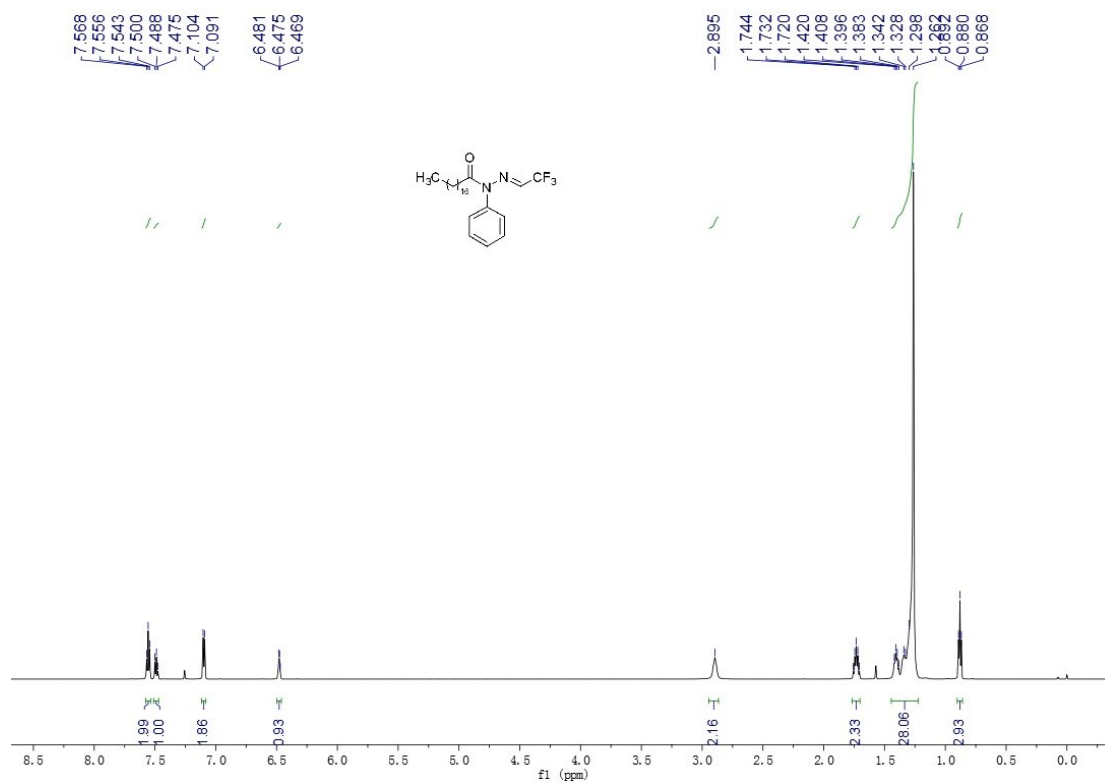

$^{13}\text{C}$  NMR copies of compound **6p**:

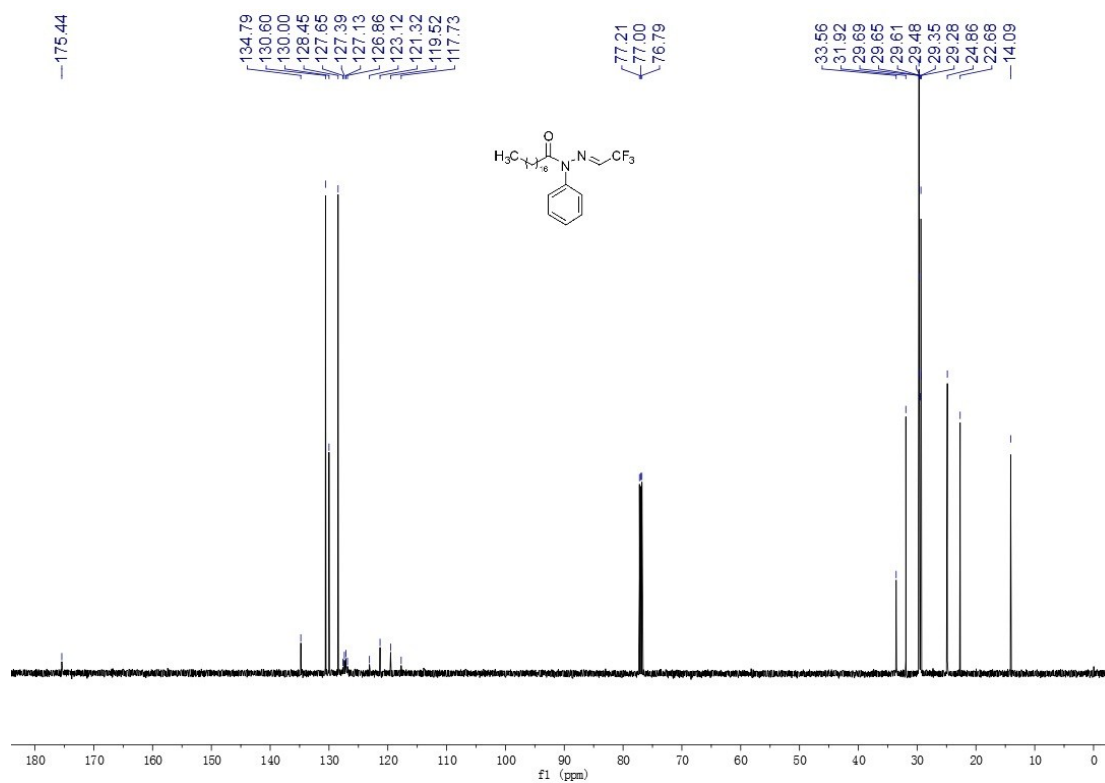

$^{19}\text{F}$  NMR copies of compound **6p**:

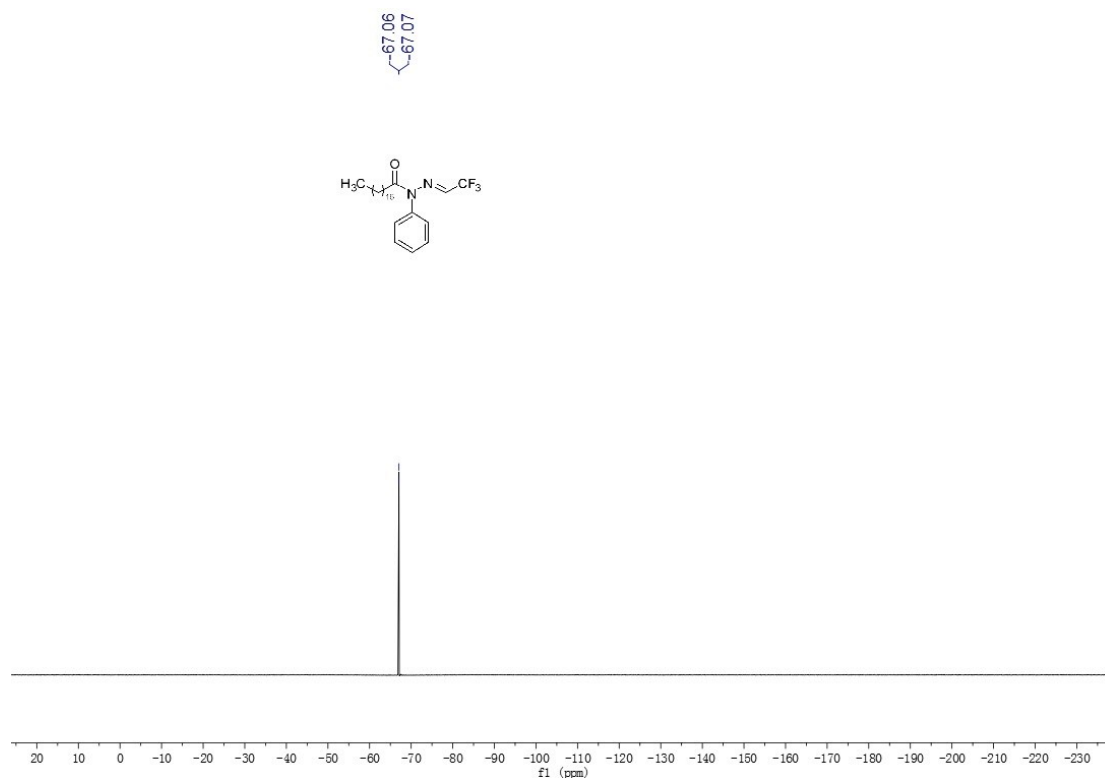

HRMS (ESI) of compound **6p**:

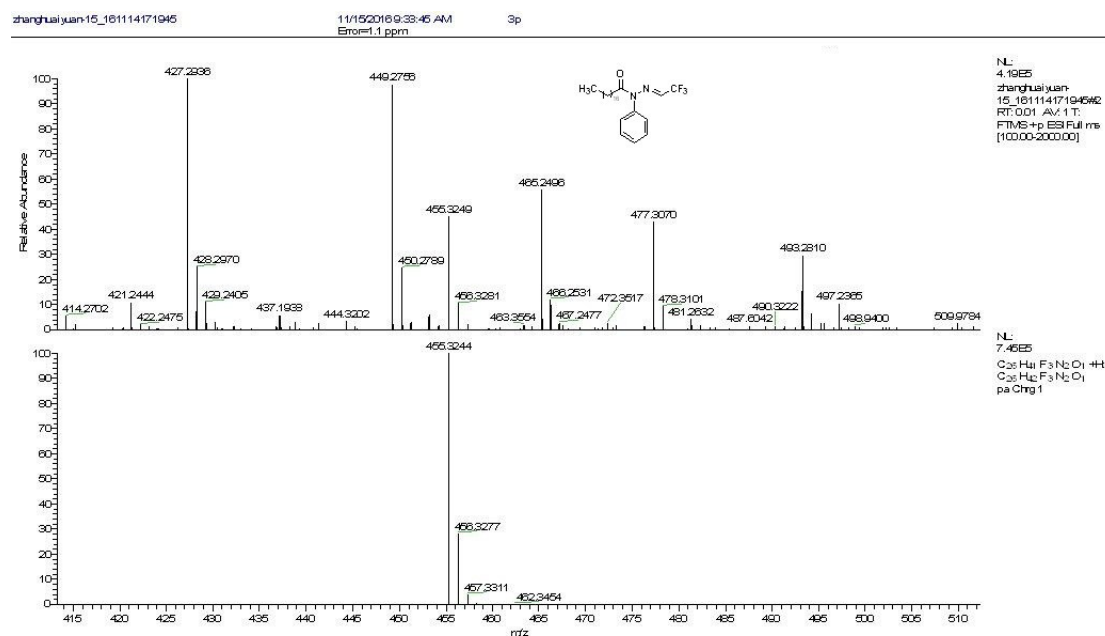

$^1\text{H}$  NMR copies of compound **6q**:

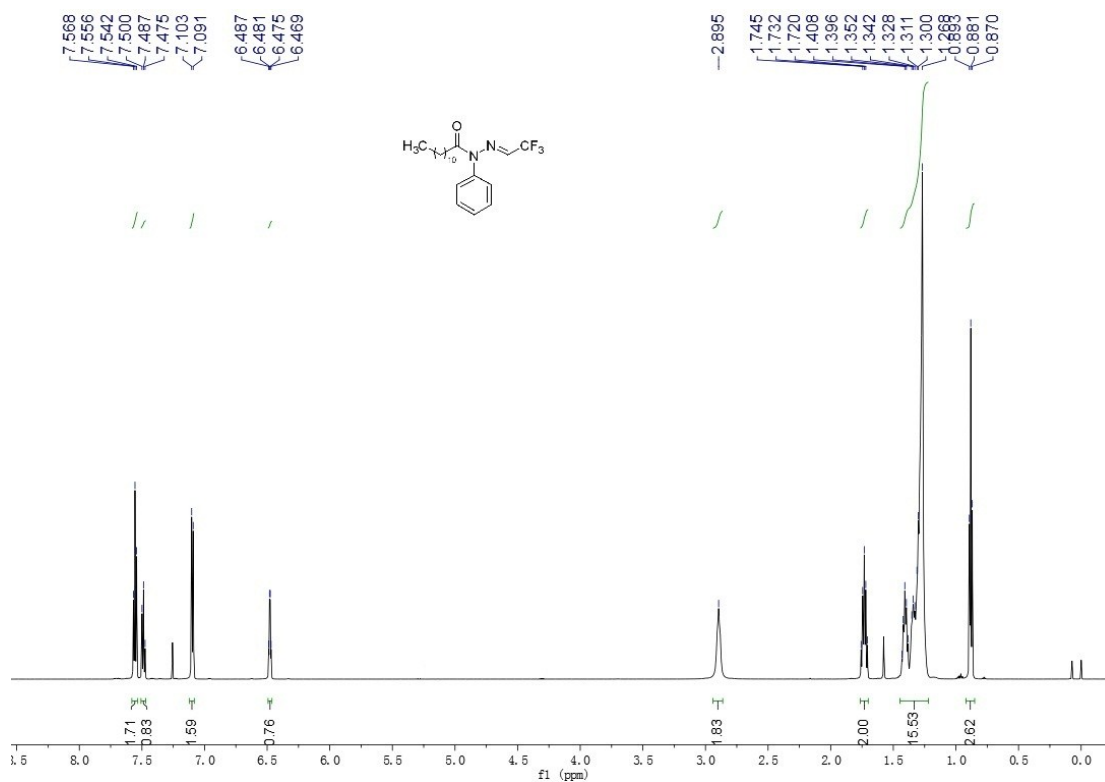

$^{13}\text{C}$  NMR copies of compound **6q**:

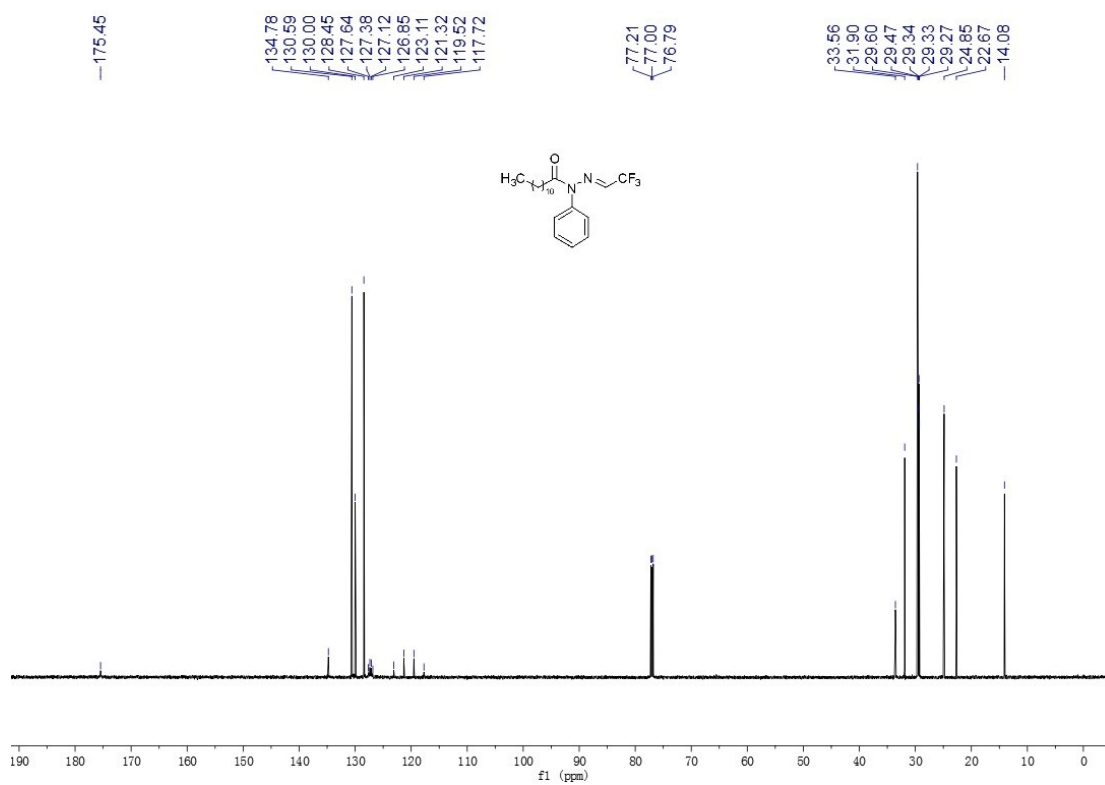

$^{19}\text{F}$  NMR copies of compound **6q**:

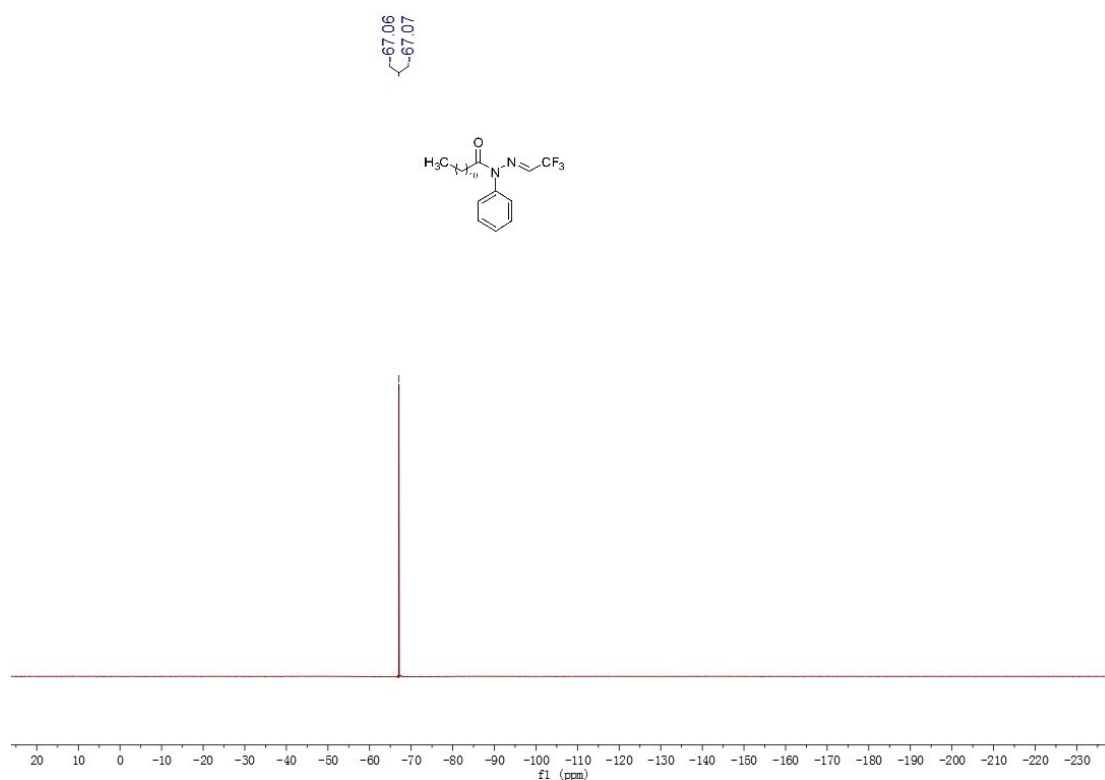

HRMS (ESI) of compound **6q**:

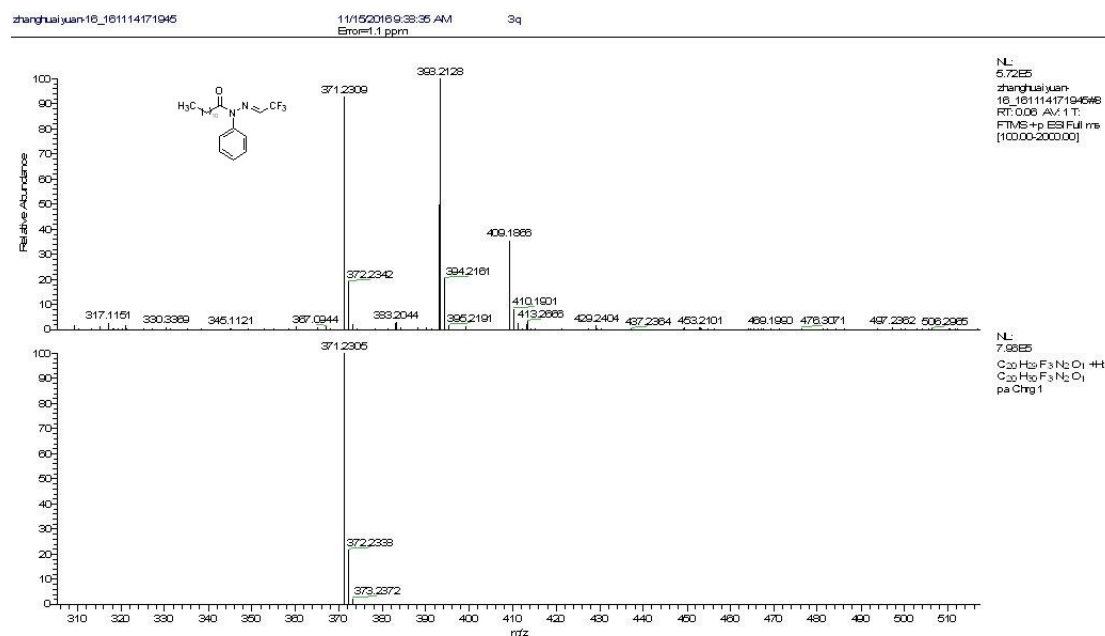

<sup>1</sup>H NMR copies of compound **6r**:

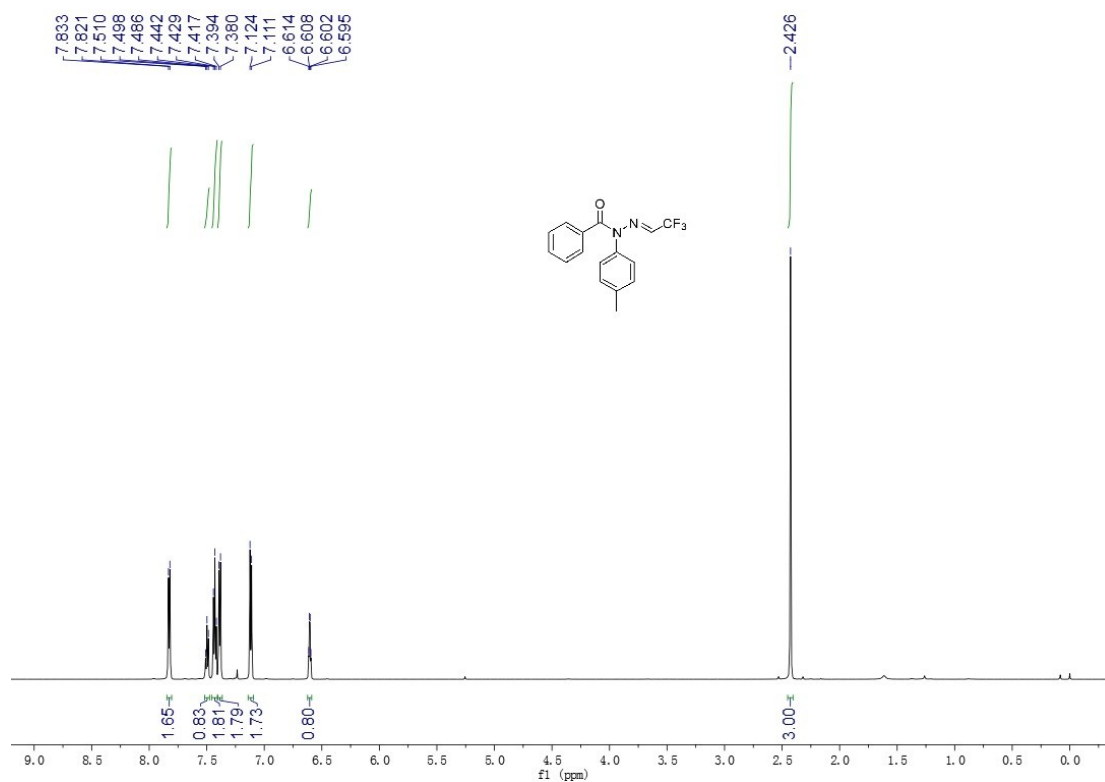

<sup>13</sup>C NMR copies of compound **6r**:

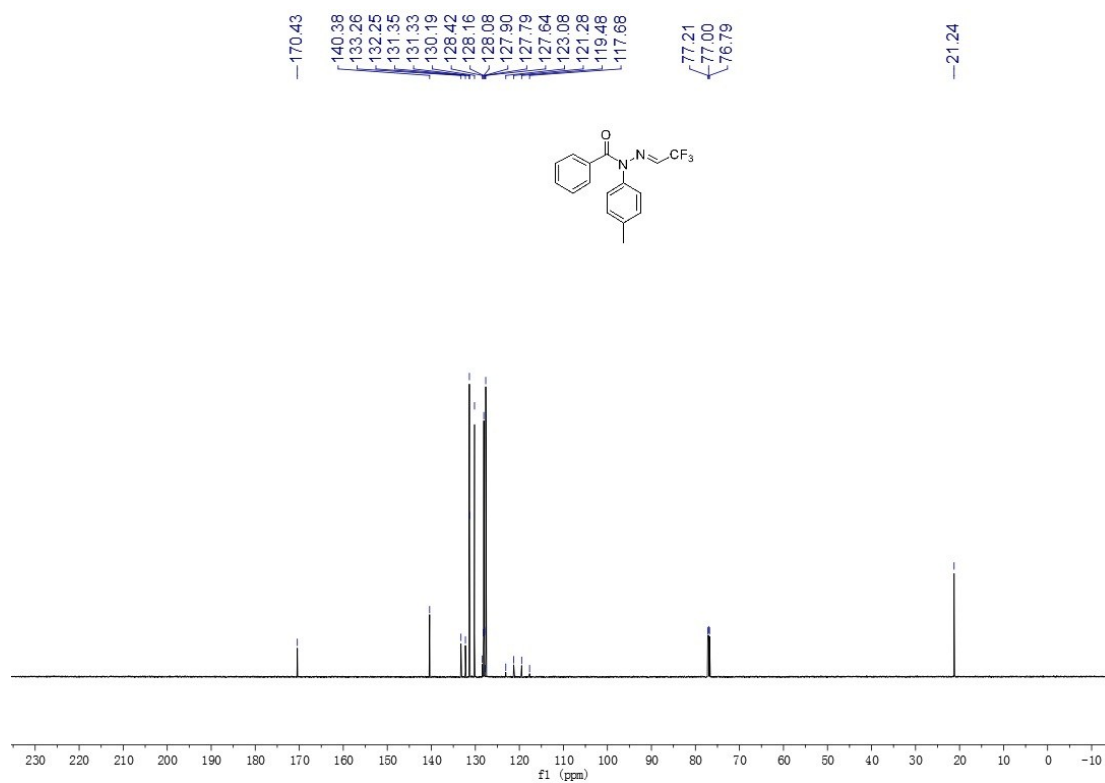

$^{19}\text{F}$  NMR copies of compound **6r**:

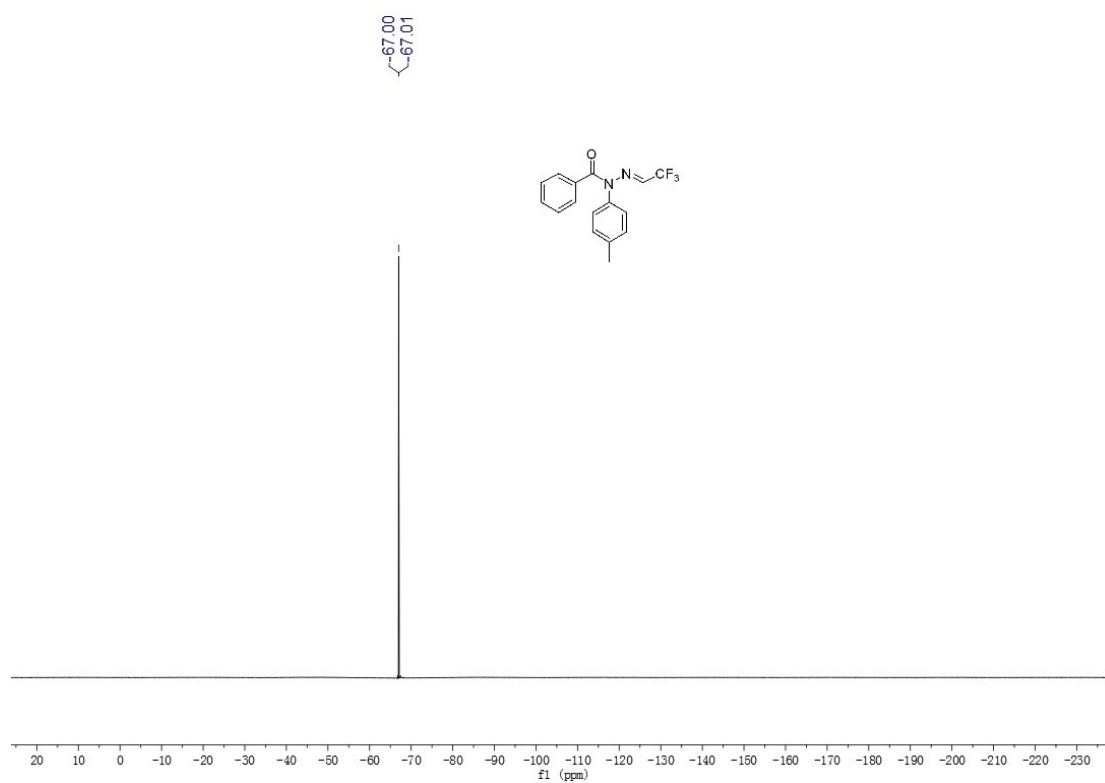

HRMS (ESI) of compound **6r**:

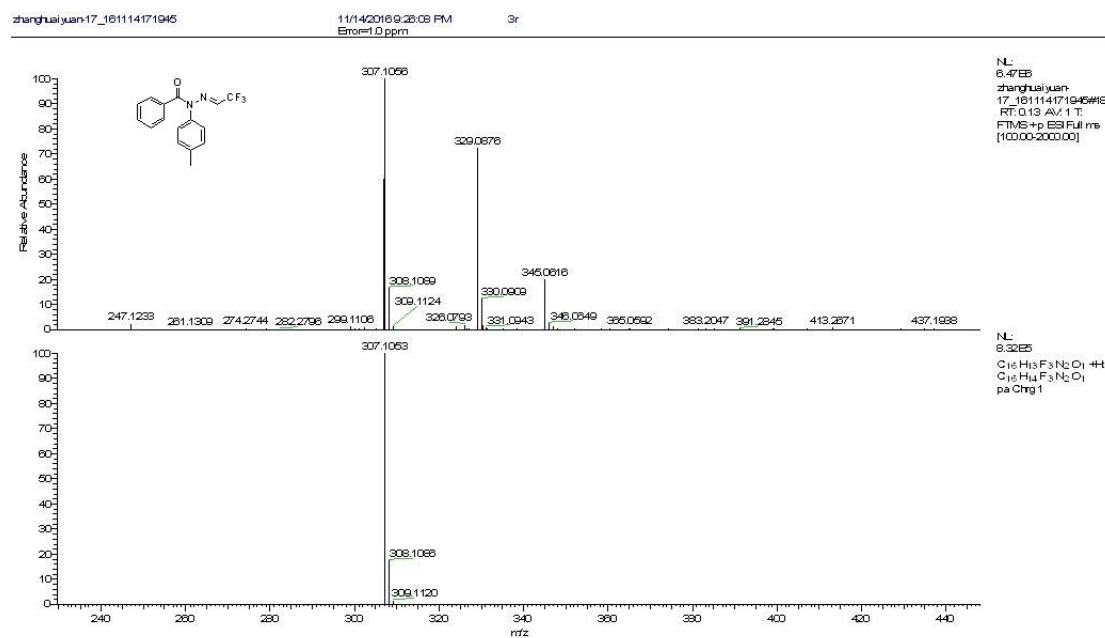

$^1\text{H}$  NMR copies of compound **6s**:

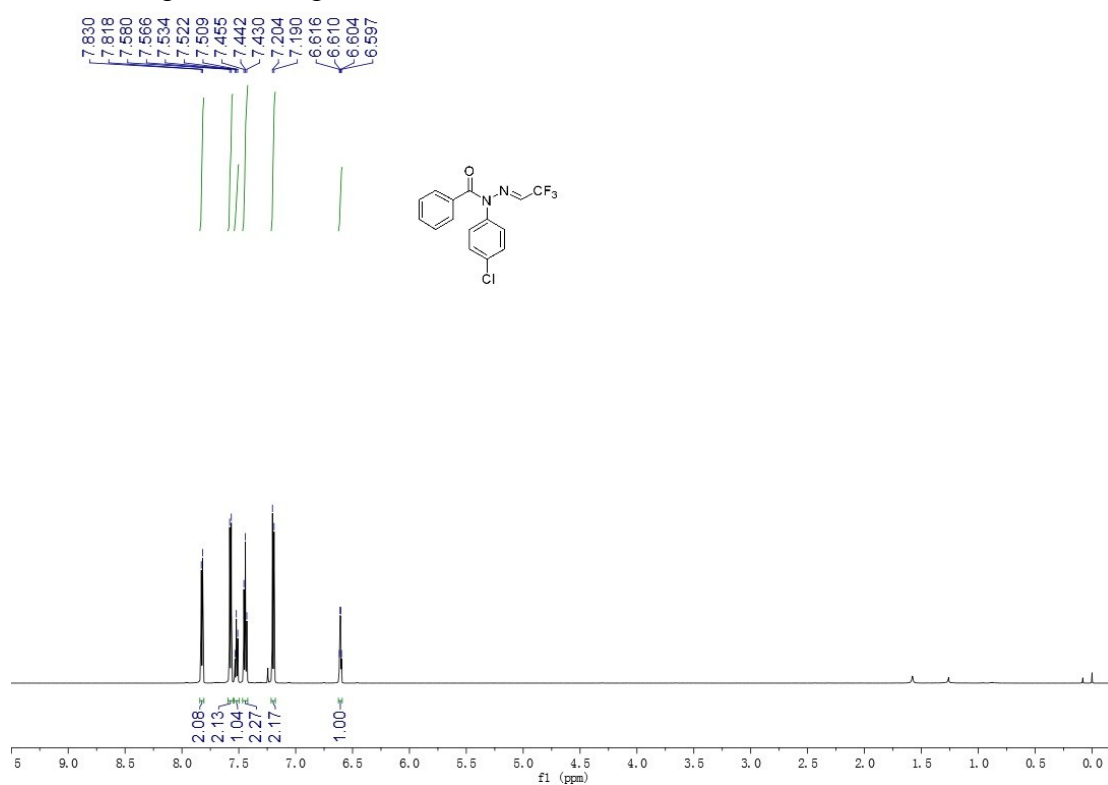

$^{13}\text{C}$  NMR copies of compound **6s**:

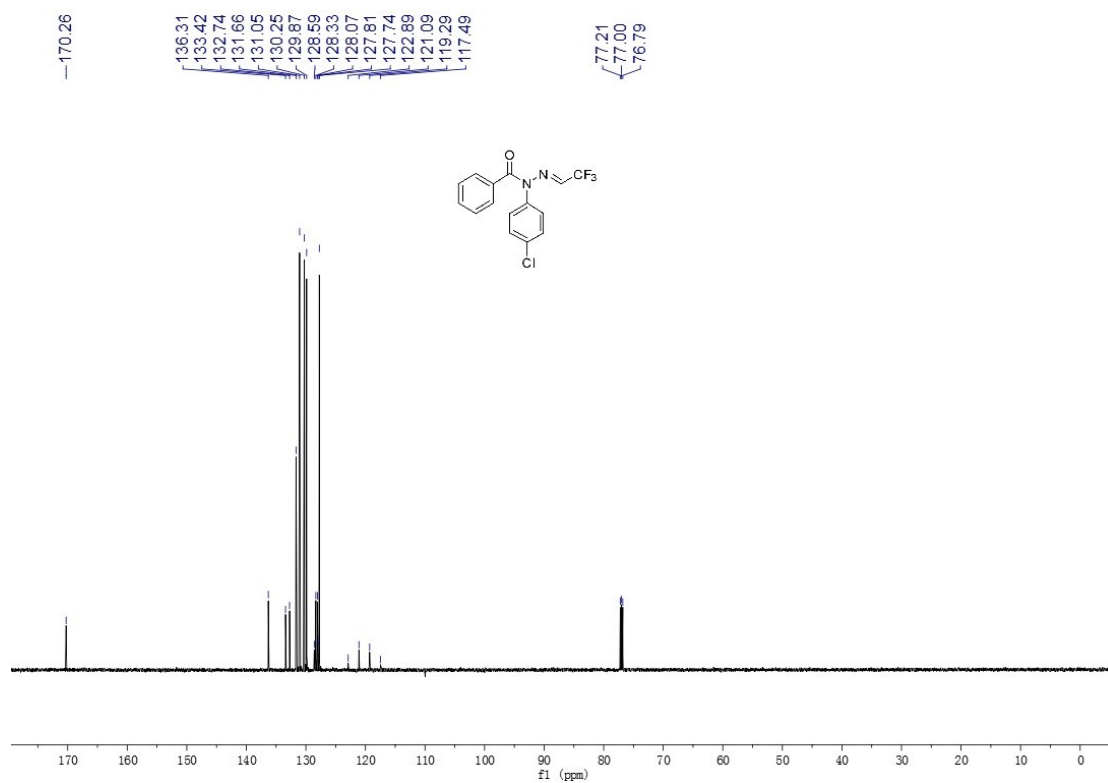

$^{19}\text{F}$  NMR copies of compound **6s**:

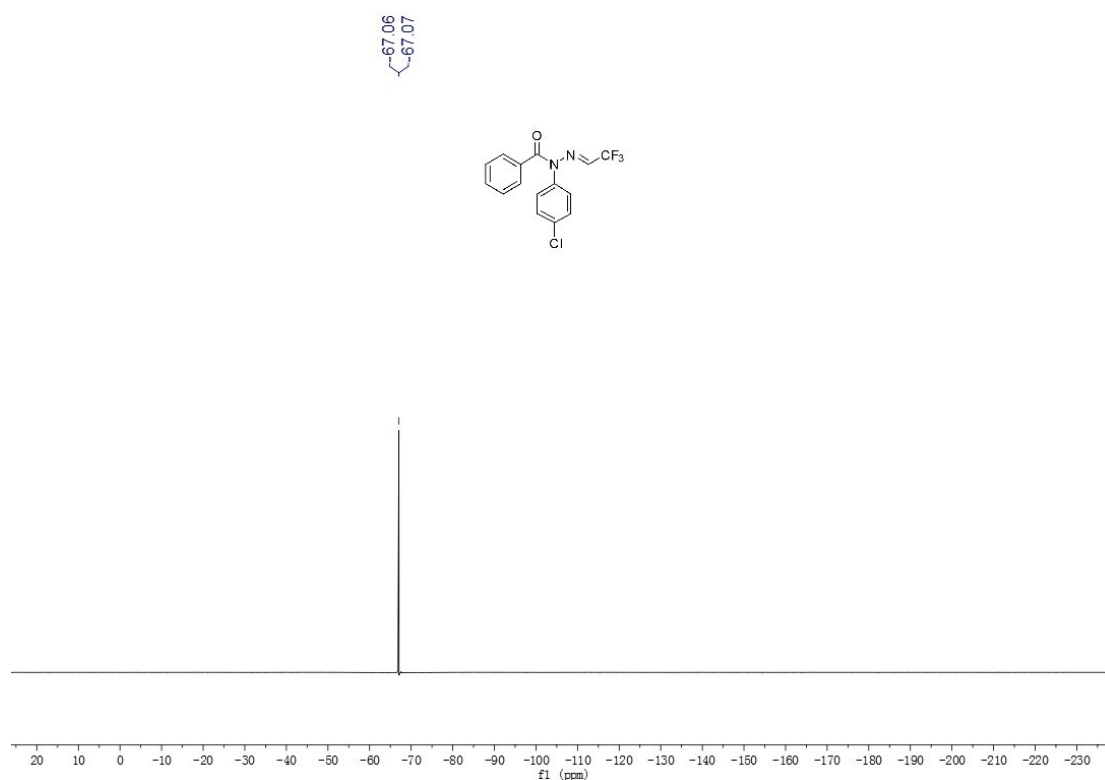

HRMS (ESI) of compound **6s**:

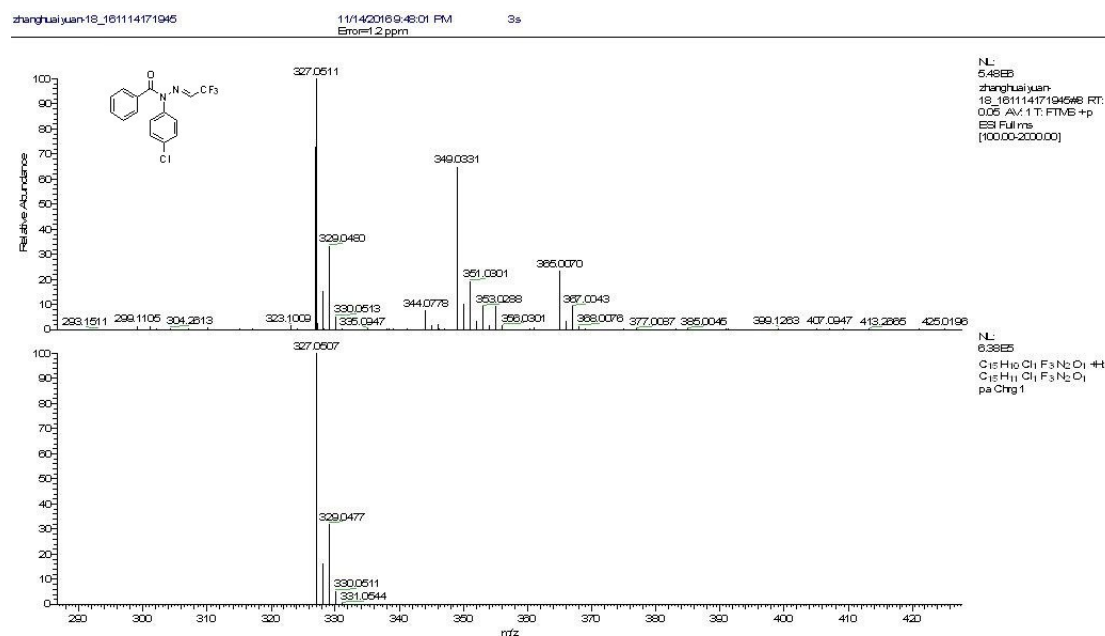

<sup>1</sup>H NMR copies of compound **6t**:

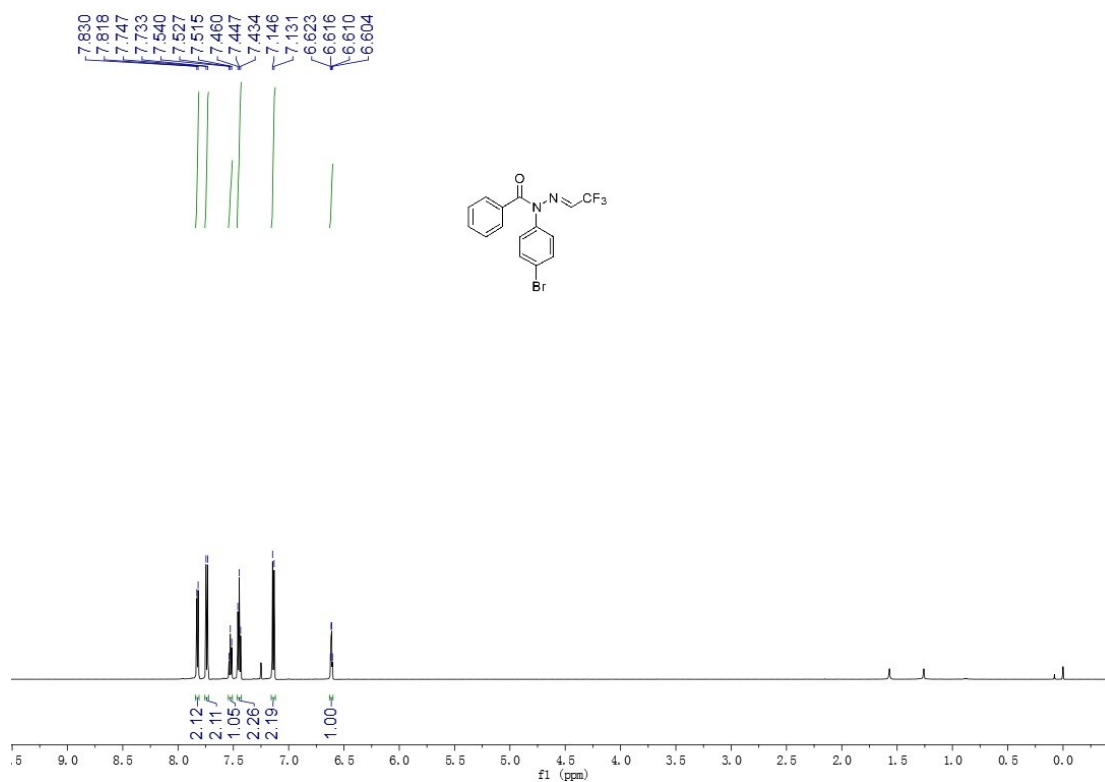

<sup>13</sup>C NMR copies of compound **6t**:

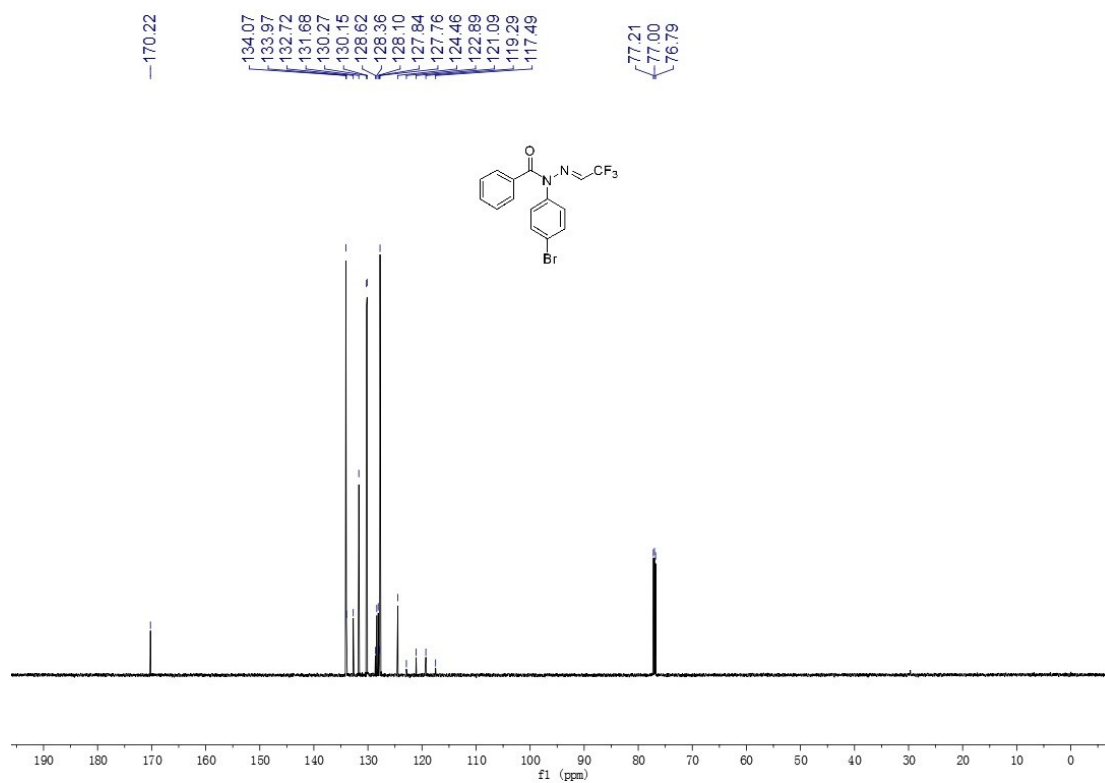

$^{19}\text{F}$  NMR copies of compound **6t**:

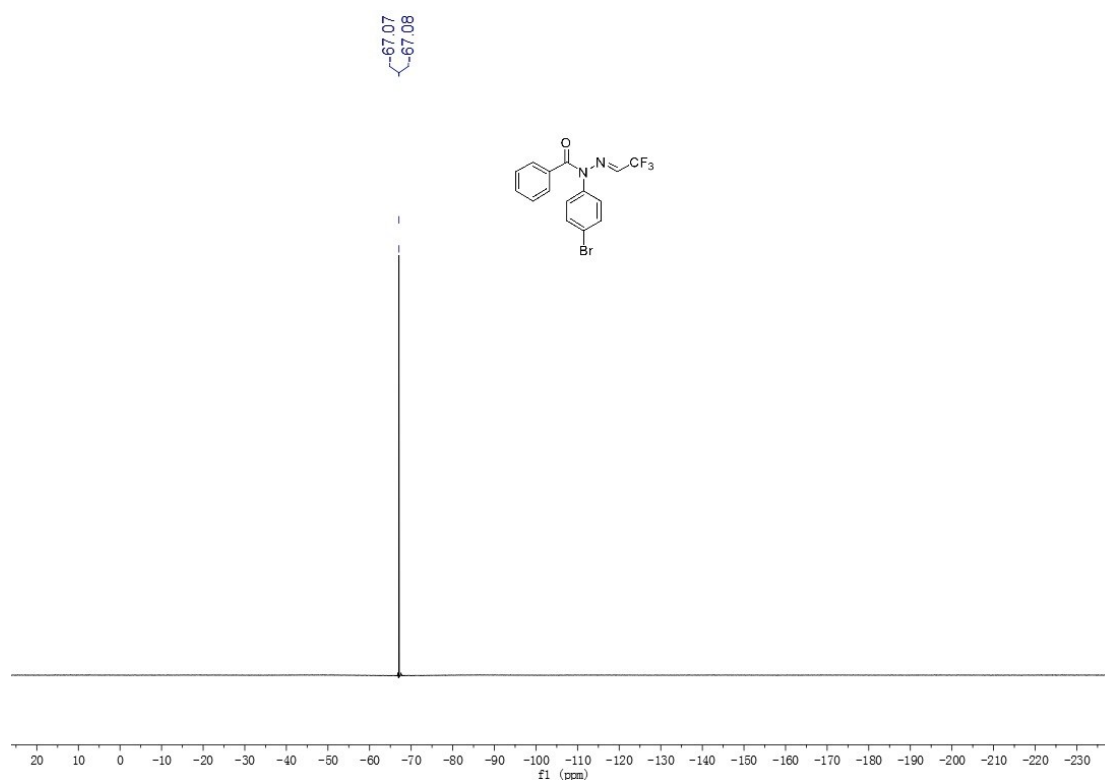

HRMS (ESI) of compound **6t**:

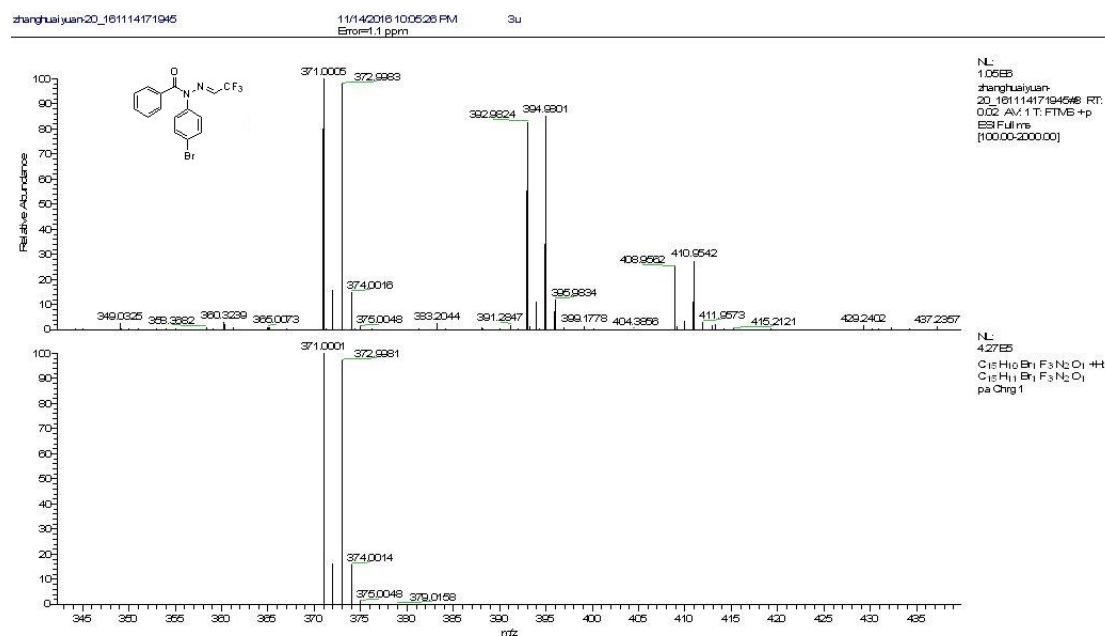

$^1\text{H}$  NMR copies of compound **6u**:

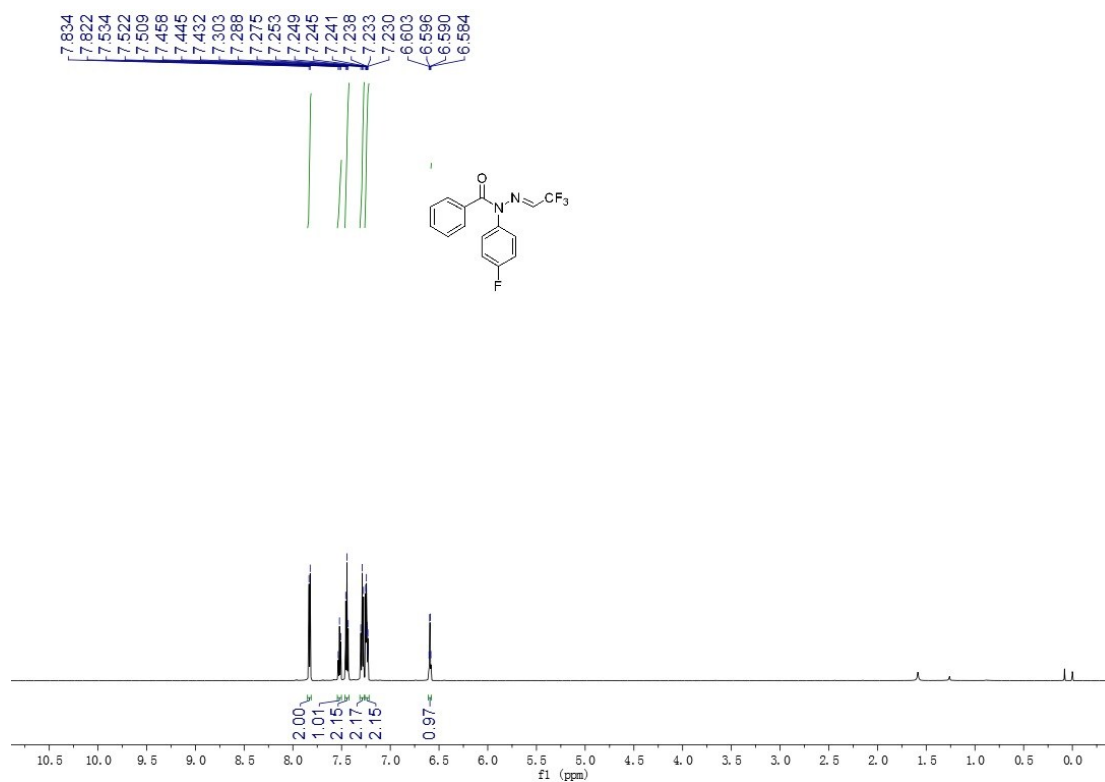

$^{13}\text{C}$  NMR copies of compound **6u**:

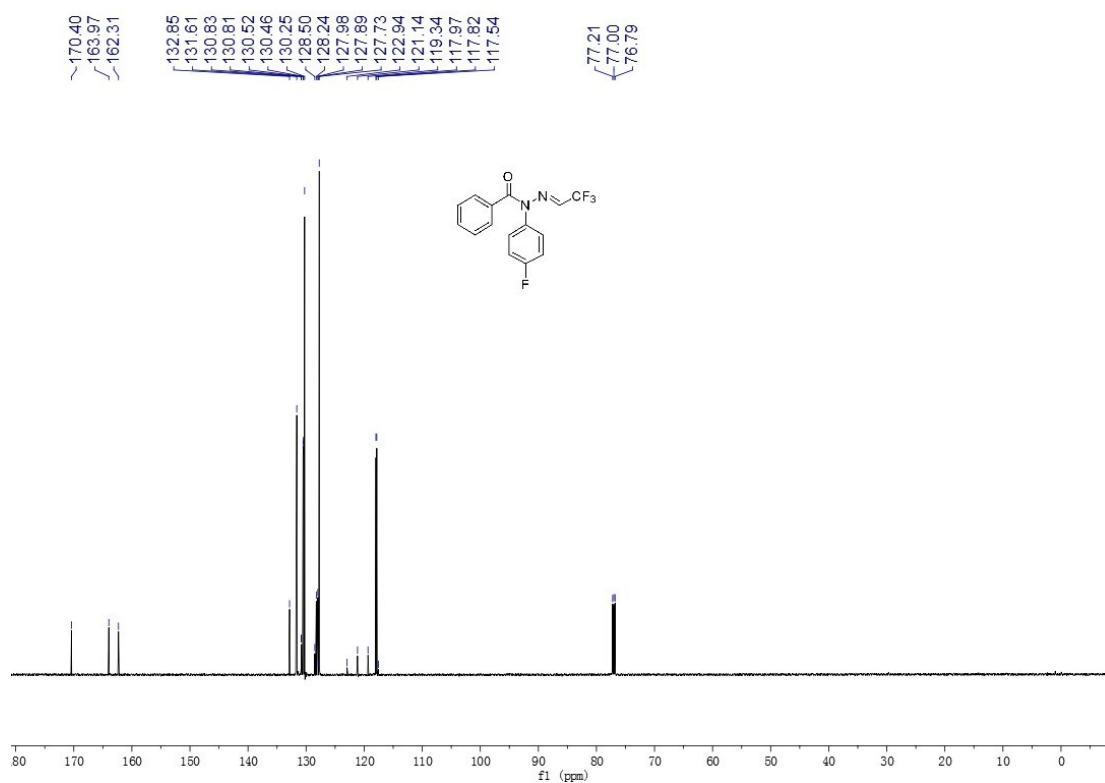

$^{19}\text{F}$  NMR copies of compound **6u**:

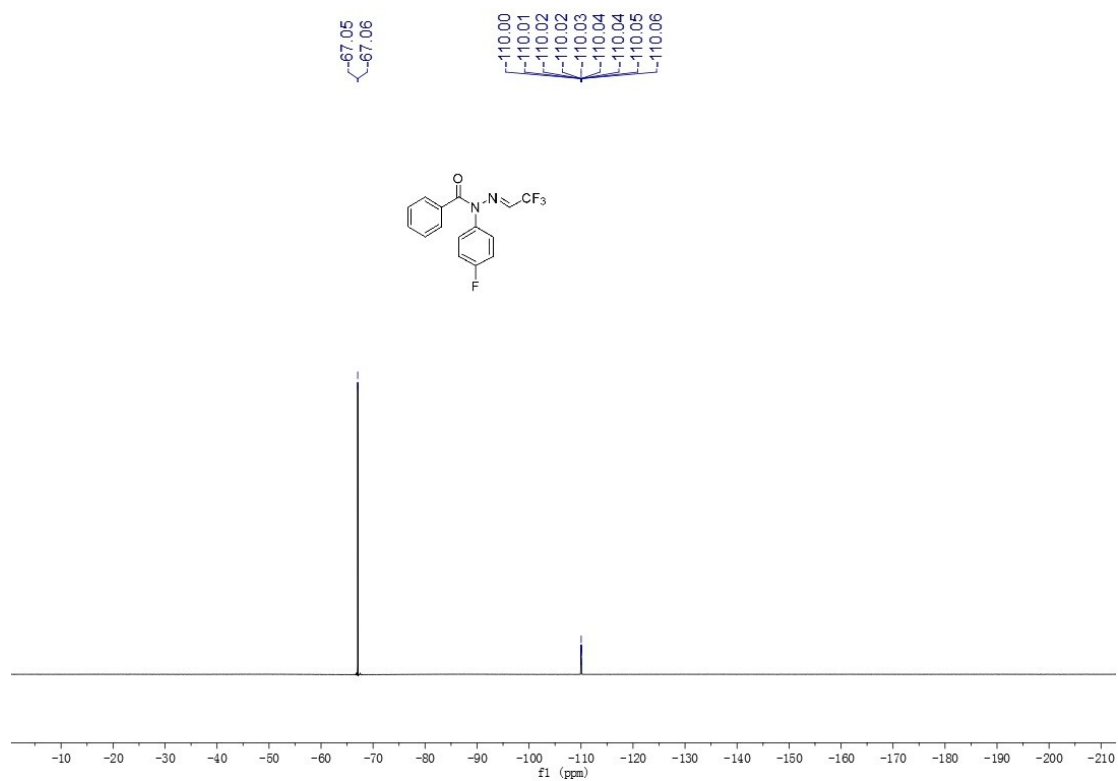

HRMS (ESI) of compound **6u**:

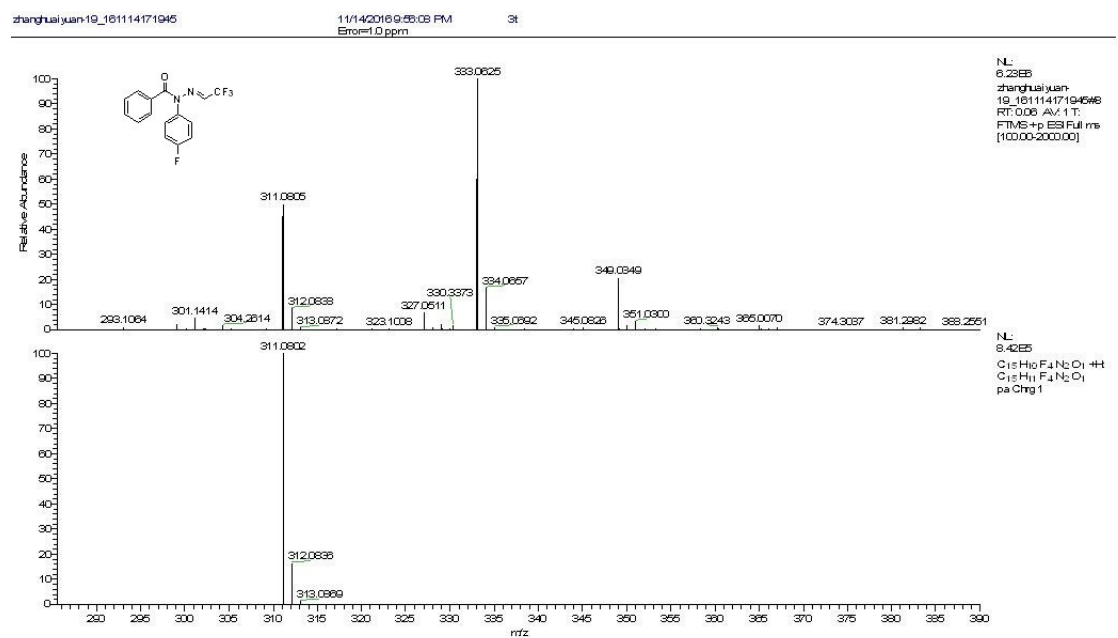

$^1\text{H}$  NMR copies of compound **6v**:

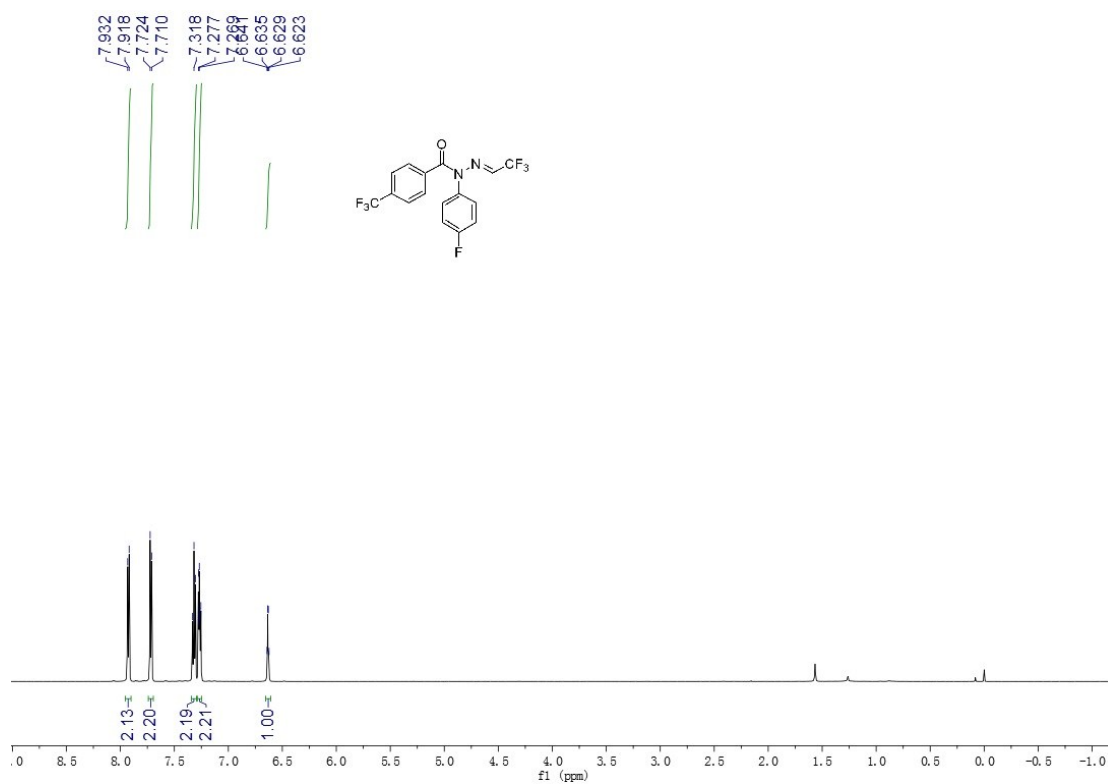

$^{13}\text{C}$  NMR copies of compound **6v**:

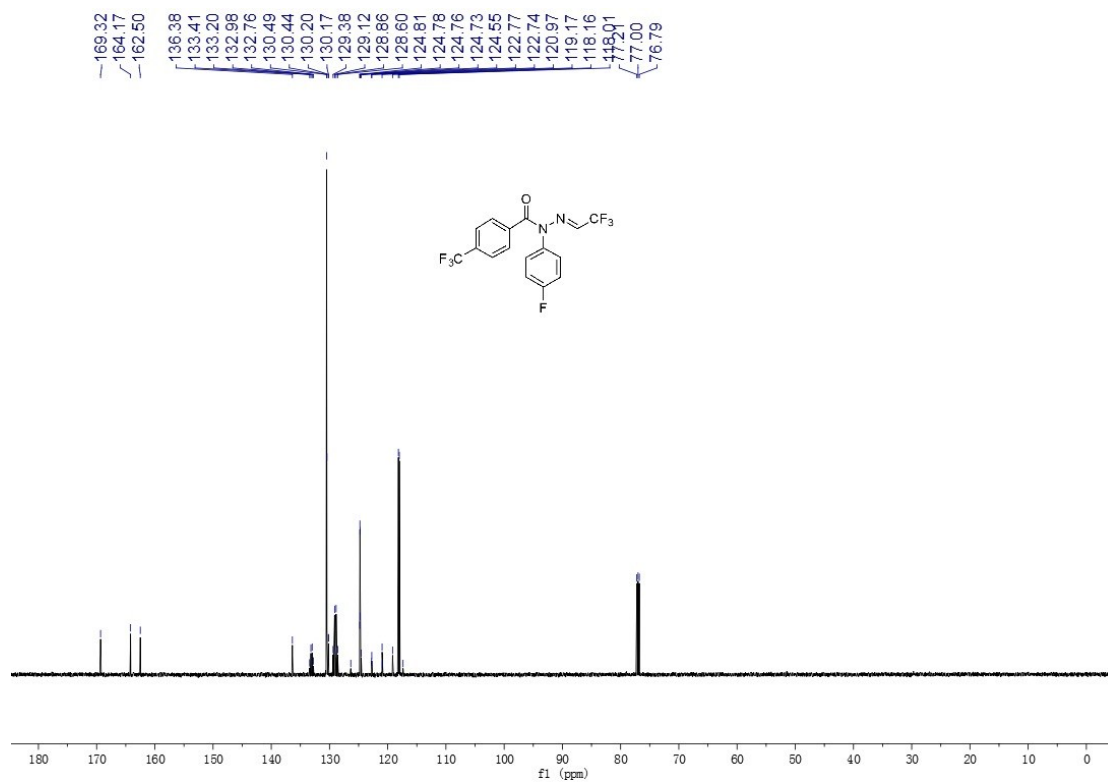

$^{19}\text{F}$  NMR copies of compound **6v**:

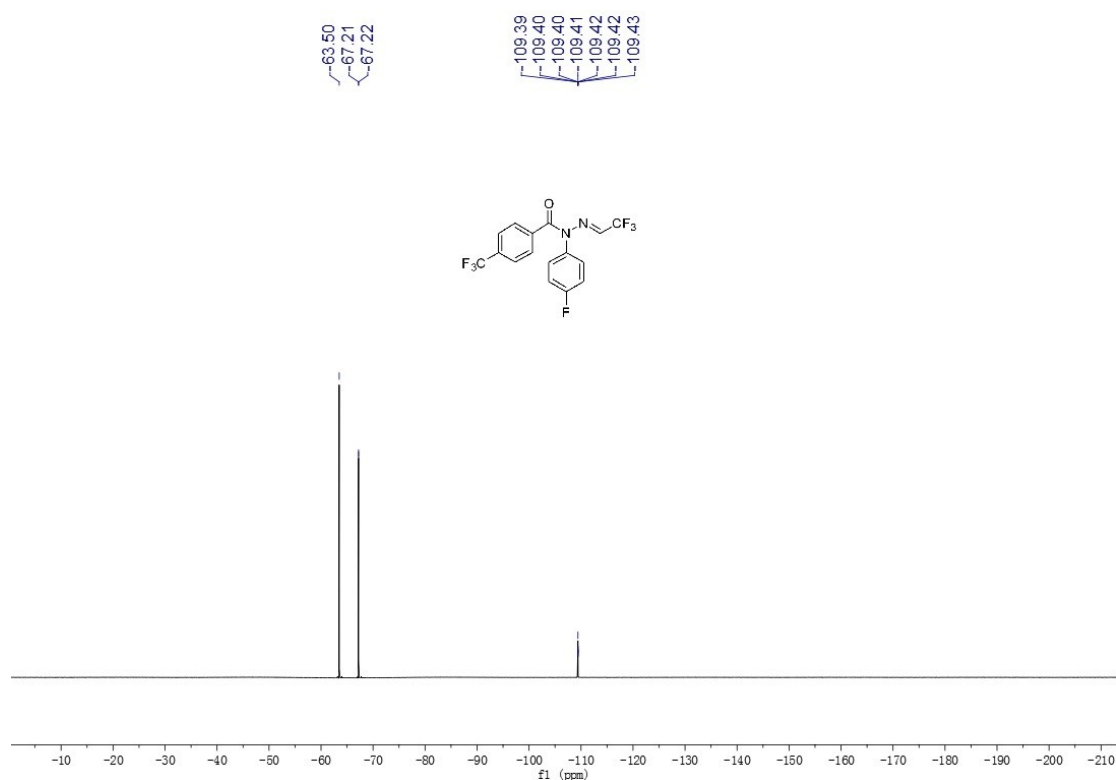

HRMS (ESI) of compound **6v**:

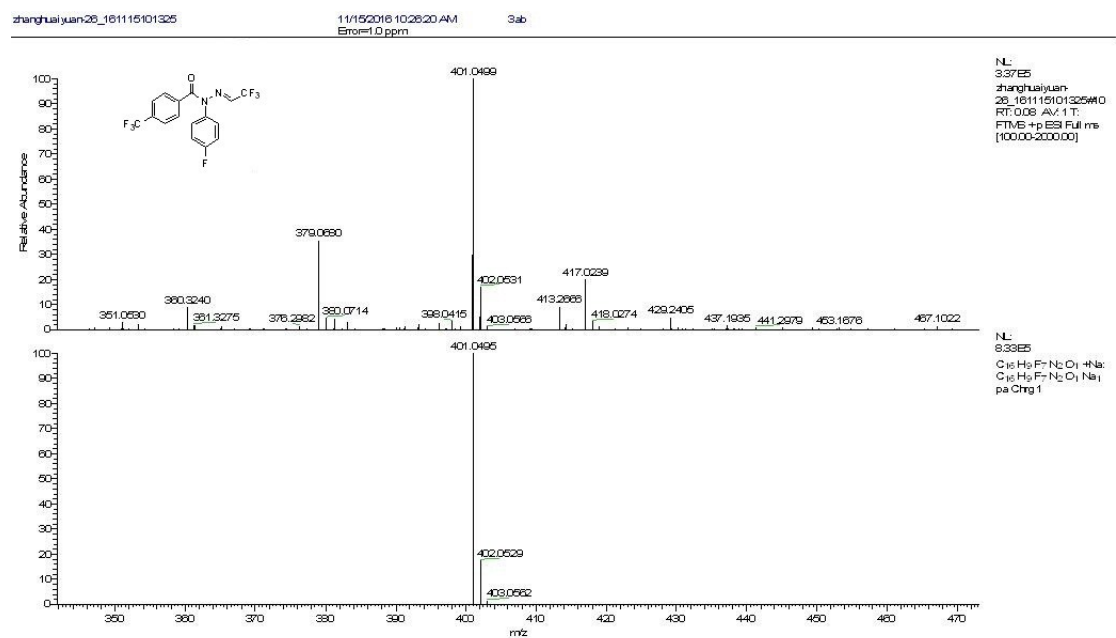

$^1\text{H}$  NMR copies of compound **6w**:

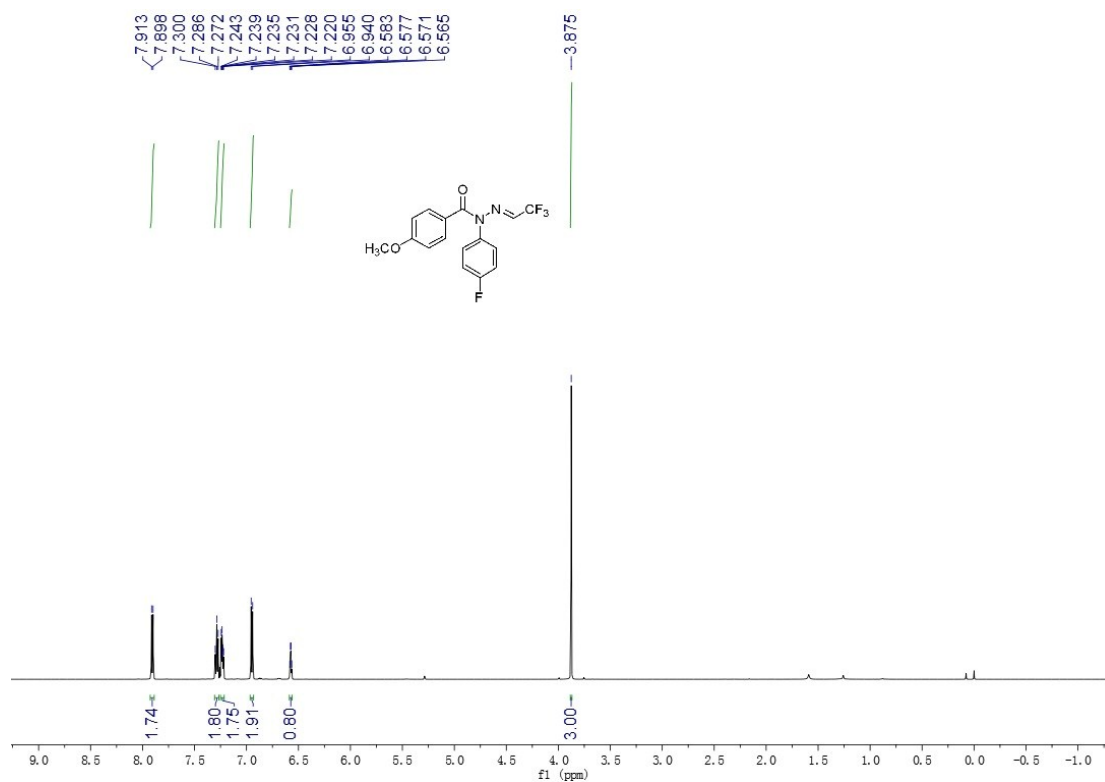

$^{13}\text{C}$  NMR copies of compound **6w**:

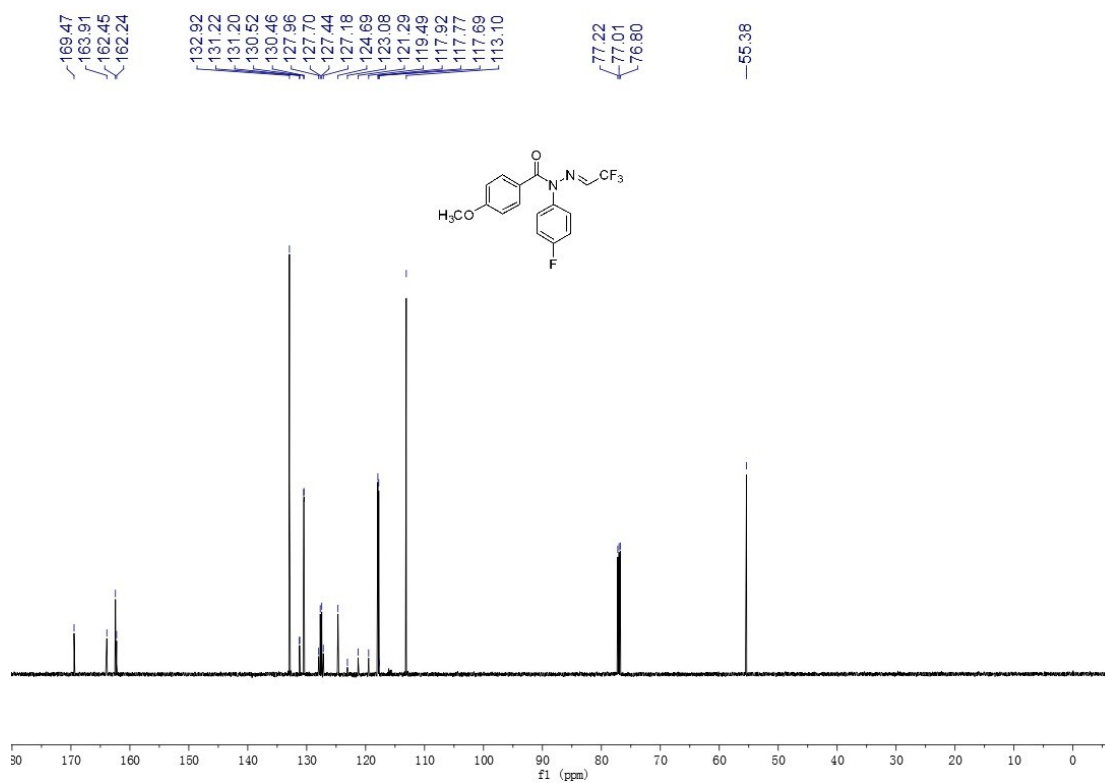

$^{19}\text{F}$  NMR copies of compound **6w**:

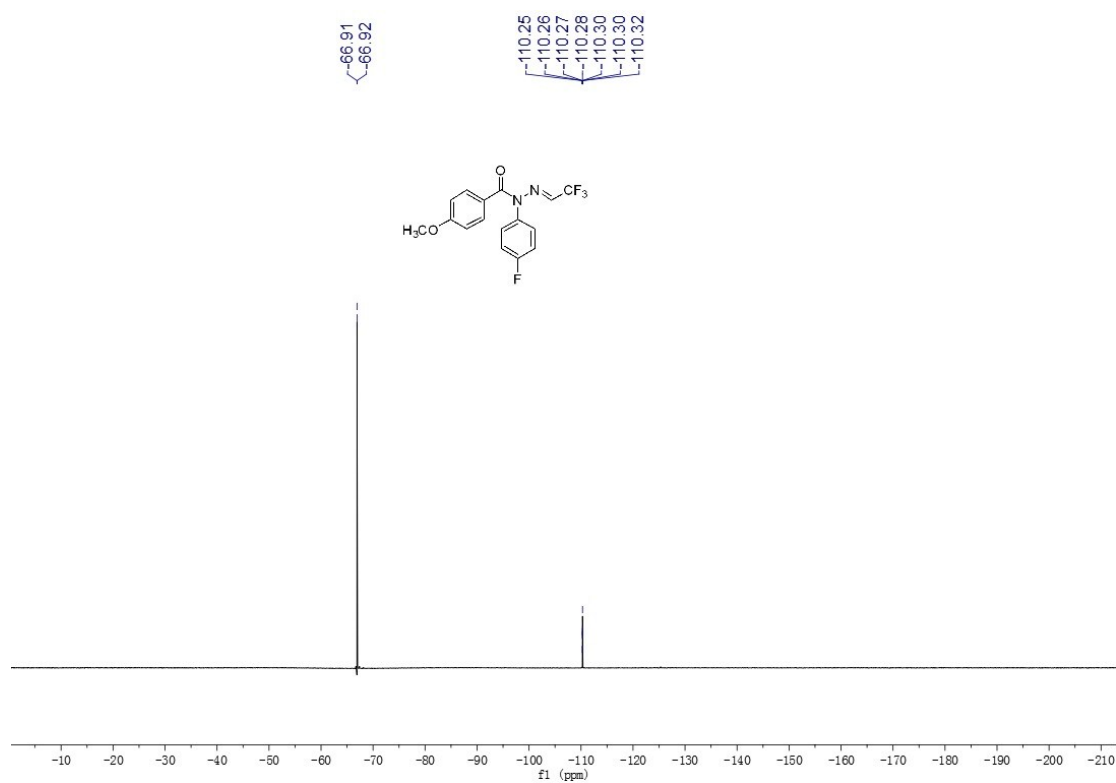

HRMS (ESI) of compound **6w**:

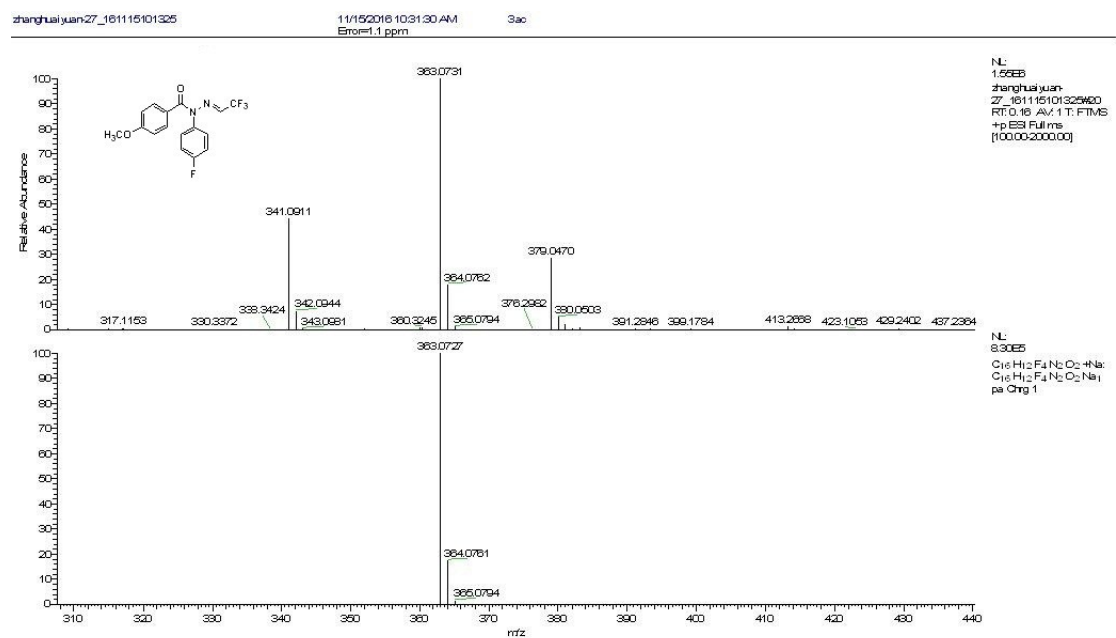

$^1\text{H}$  NMR copies of compound **6x**:

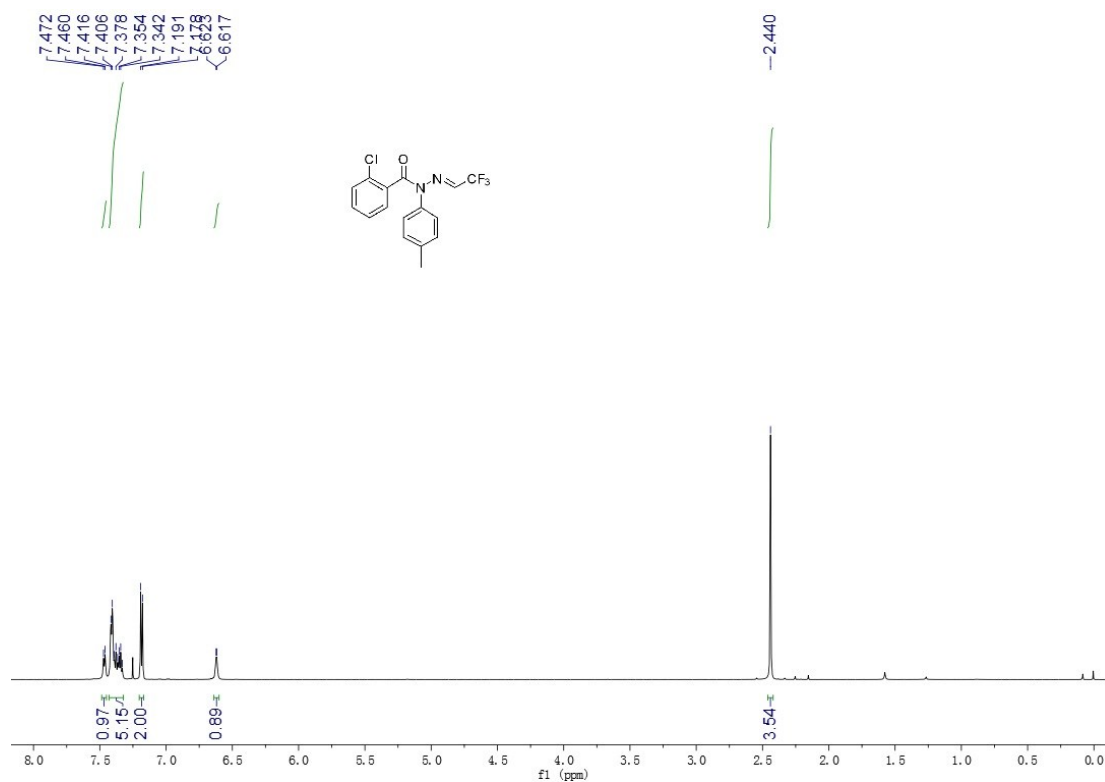

$^{13}\text{C}$  NMR copies of compound **6x**:

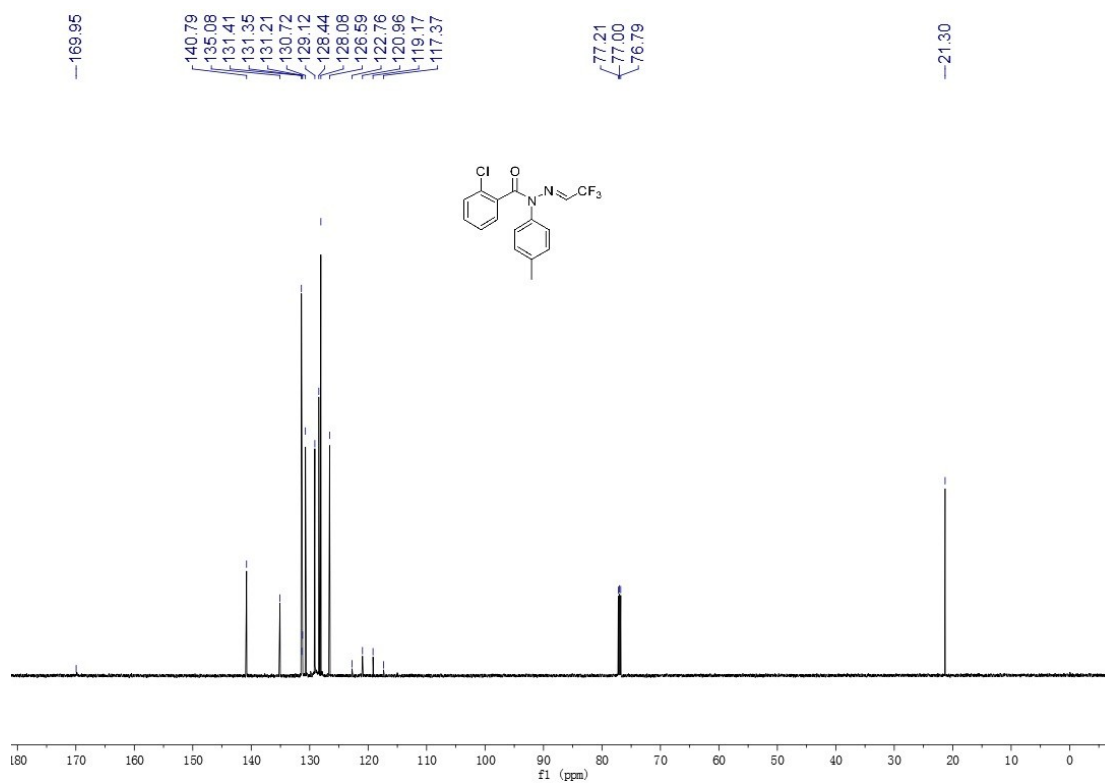

$^{19}\text{F}$  NMR copies of compound **6x**:

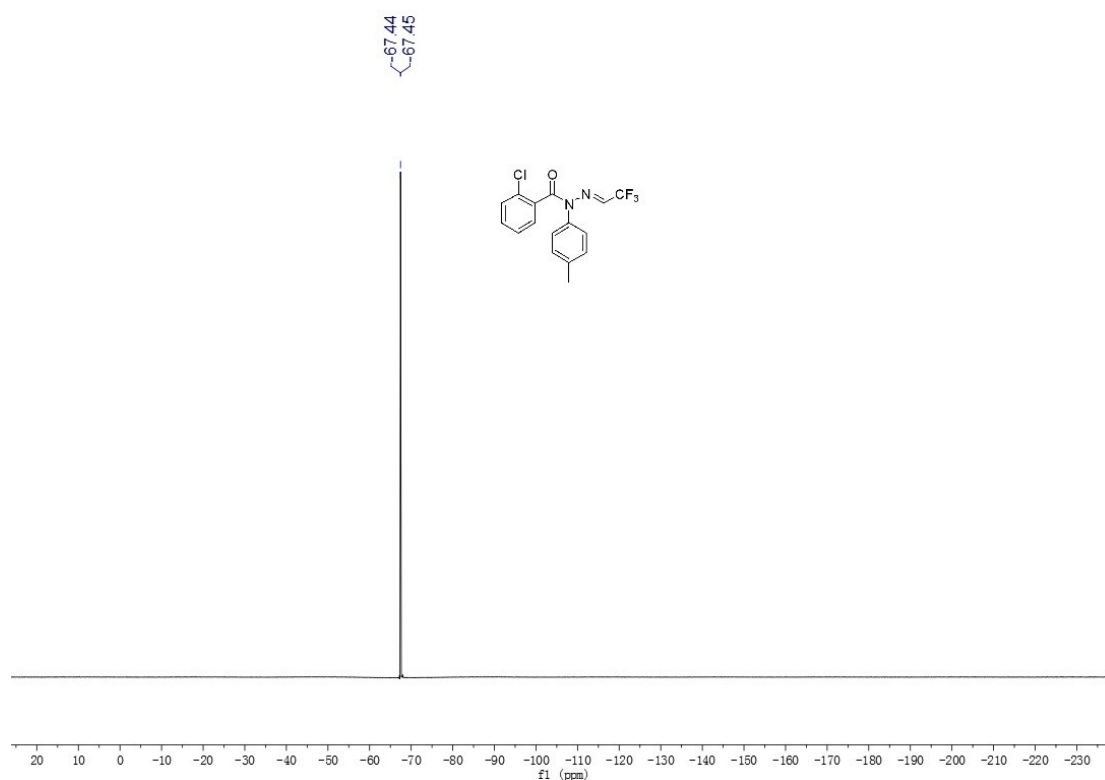

HRMS (ESI) of compound **6x**:

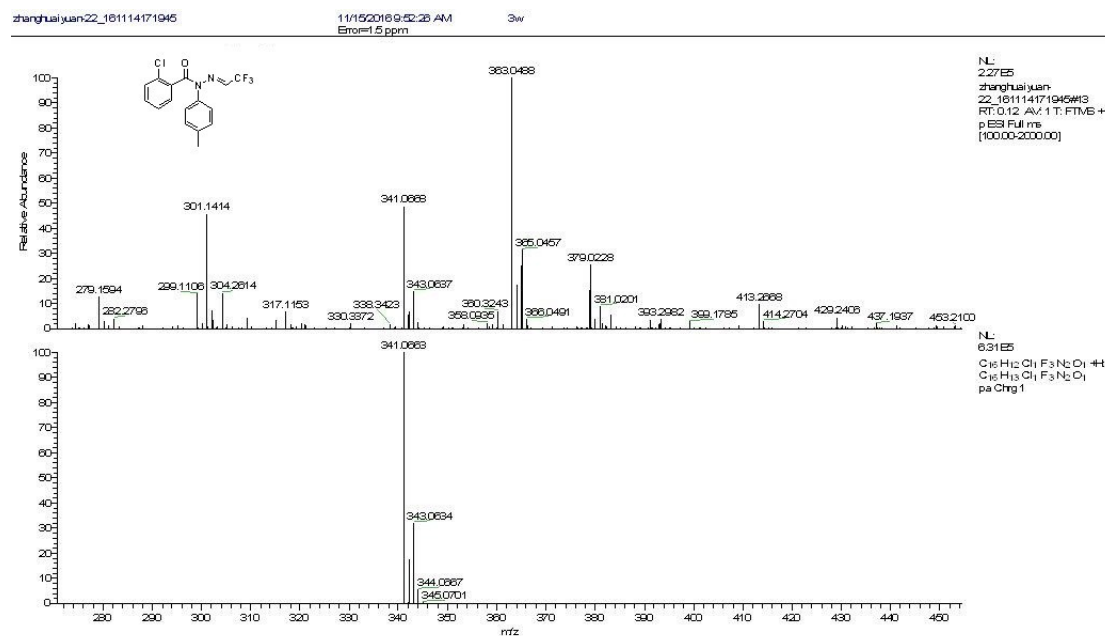

$^1\text{H}$  NMR copies of compound **6y**:

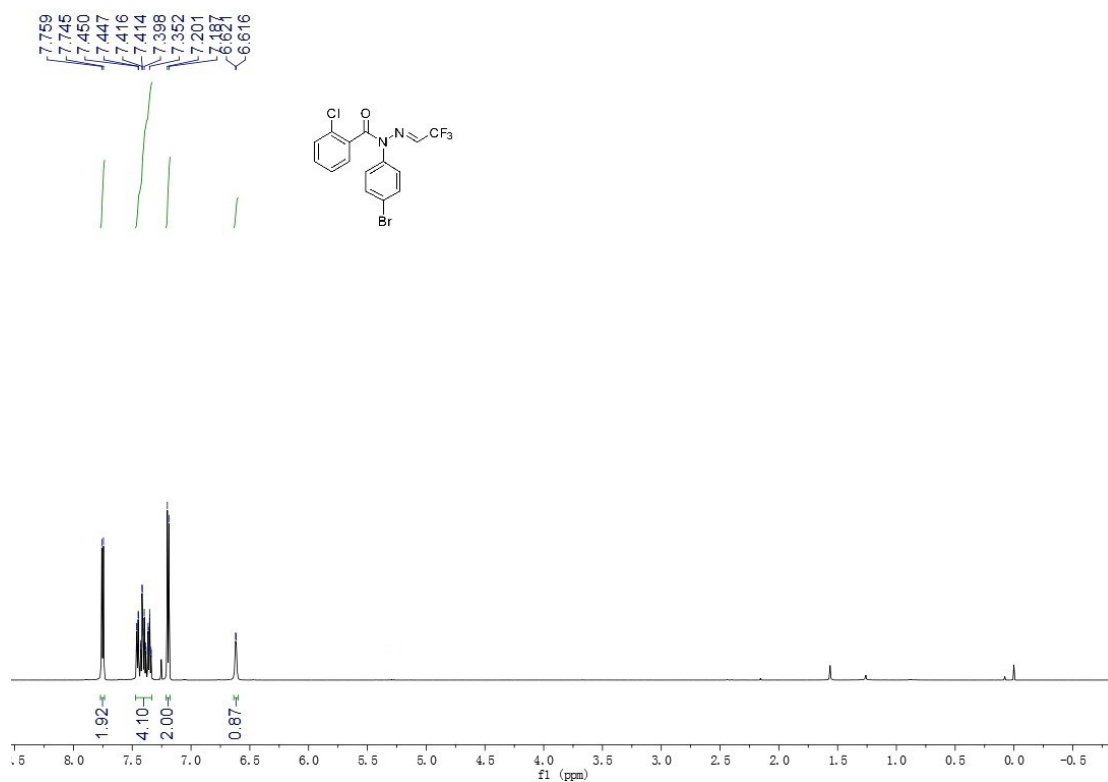

$^{13}\text{C}$  NMR copies of compound **6y**:

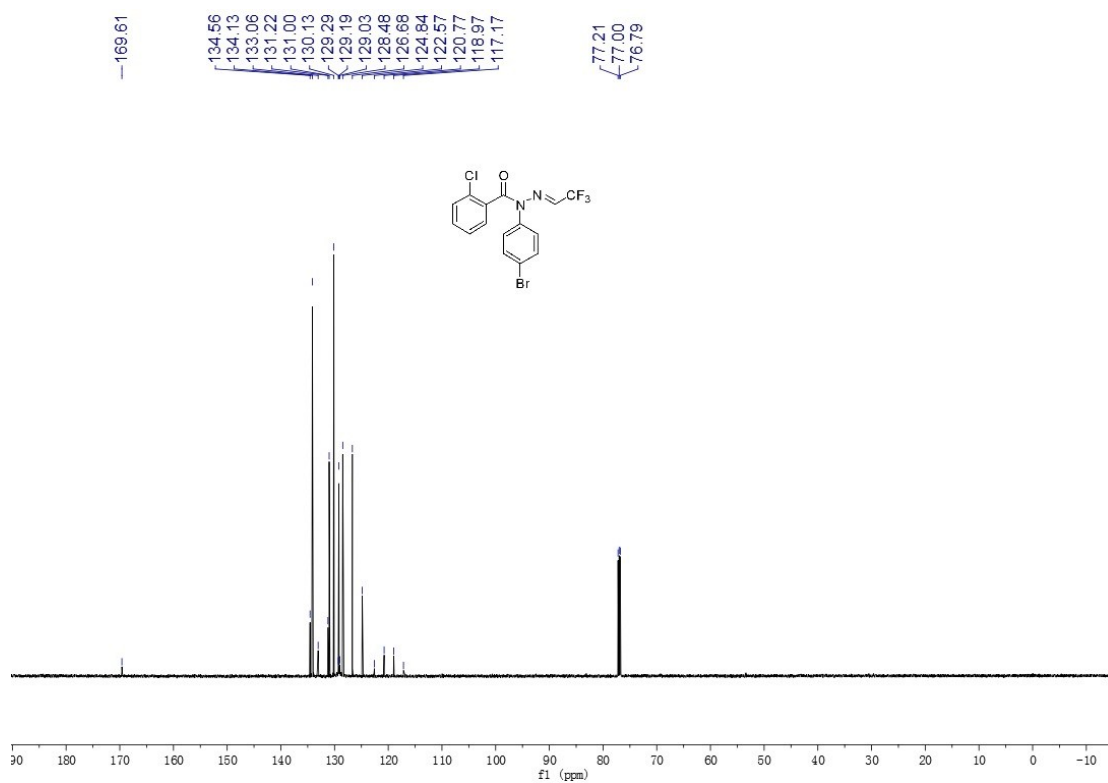

$^{19}\text{F}$  NMR copies of compound **6y**:

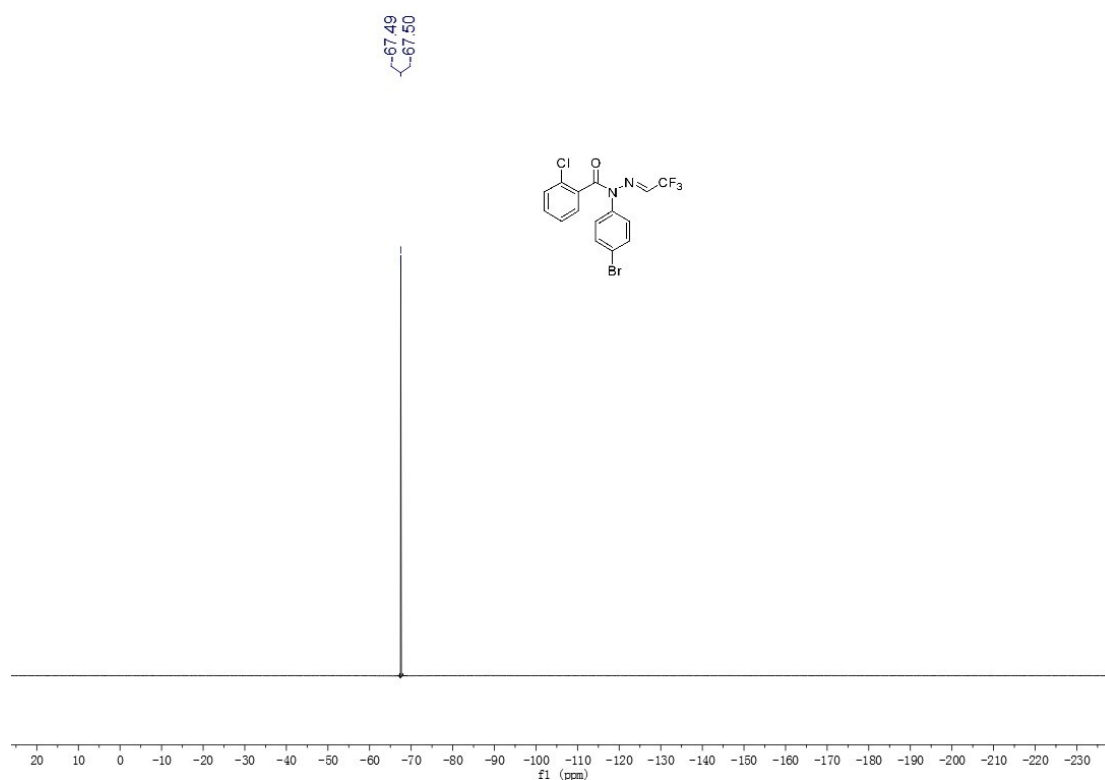

HRMS (ESI) of compound **6y**:

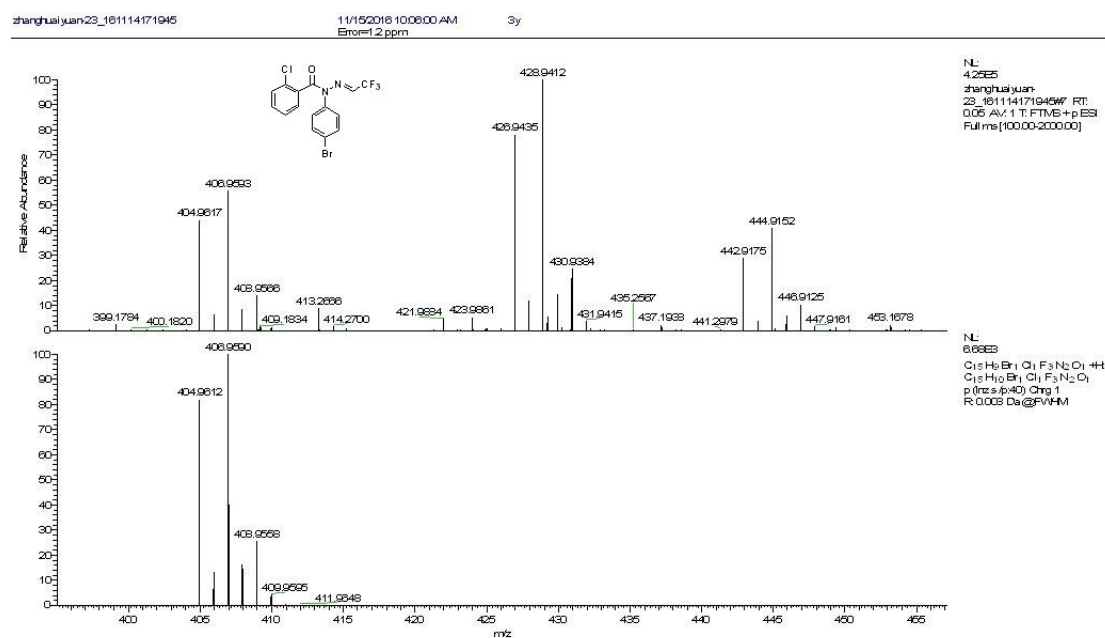

<sup>1</sup>H NMR copies of compound **6z**:

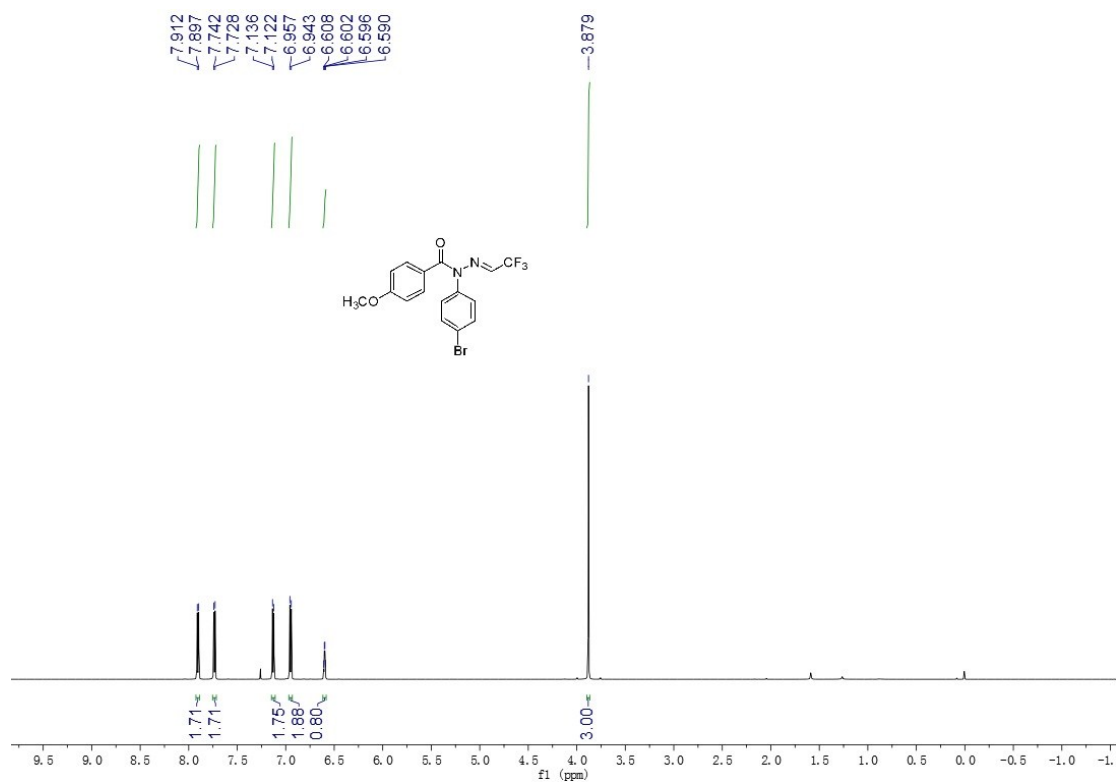

<sup>13</sup>C NMR copies of compound **6z**:

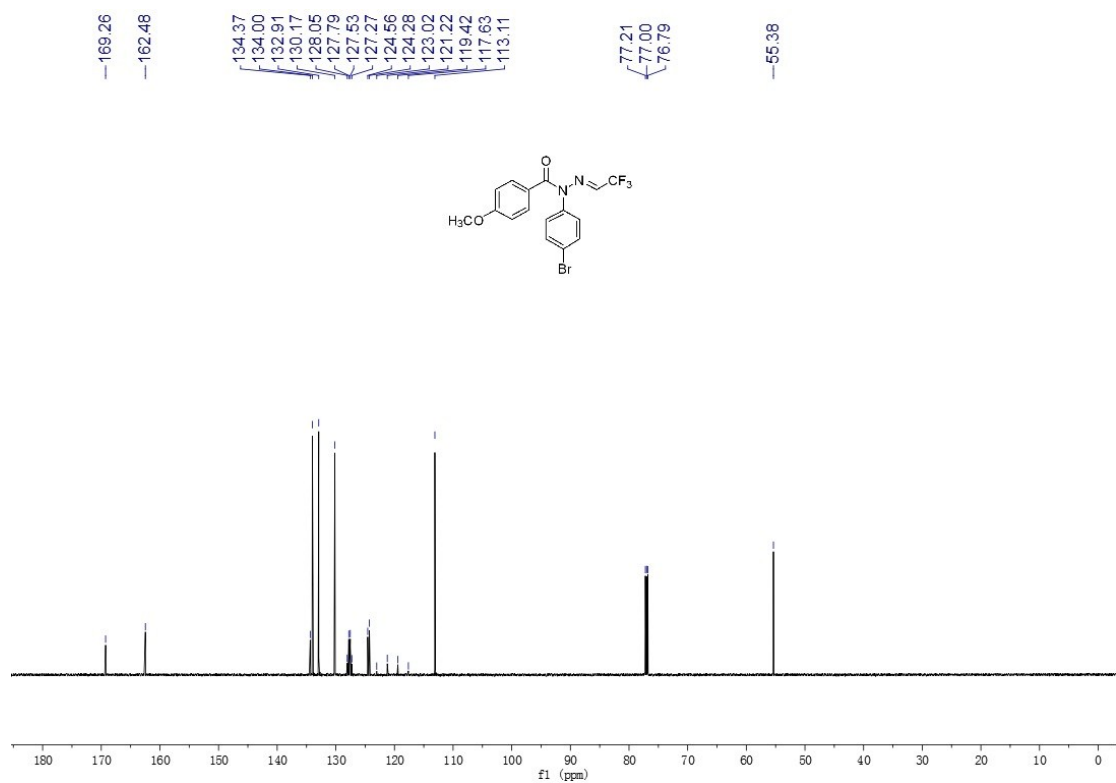

$^{19}\text{F}$  NMR copies of compound **6z**:

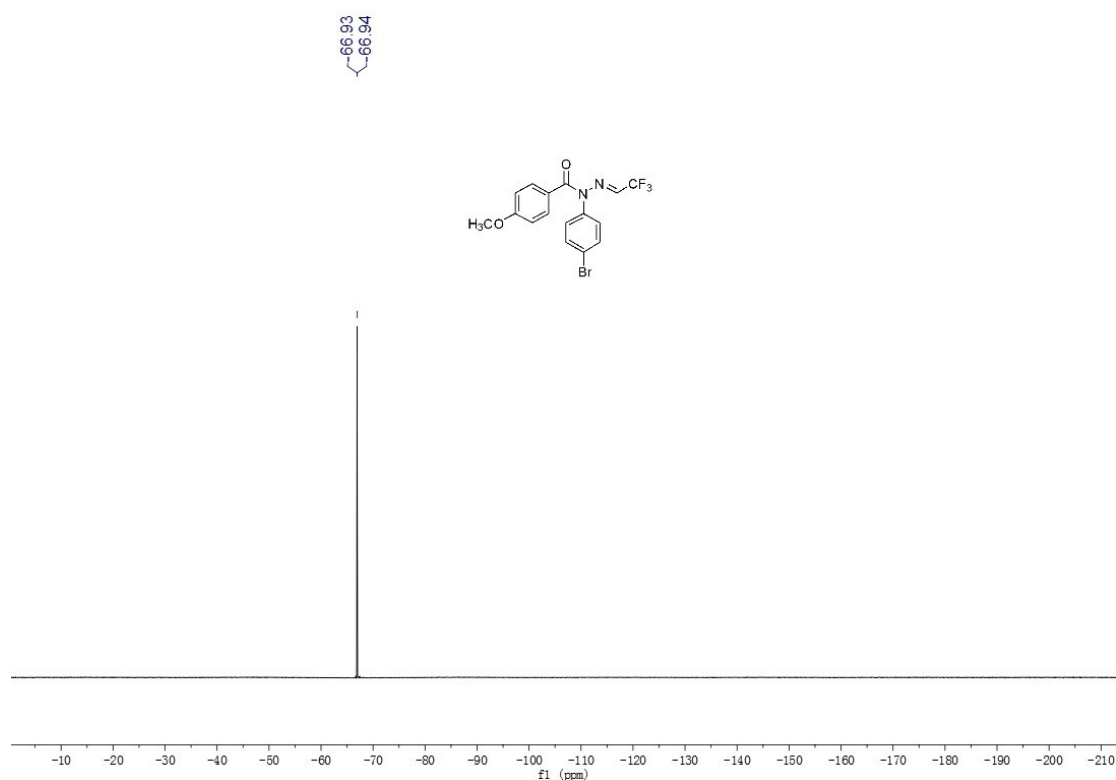

HRMS (ESI) of compound **6z**:

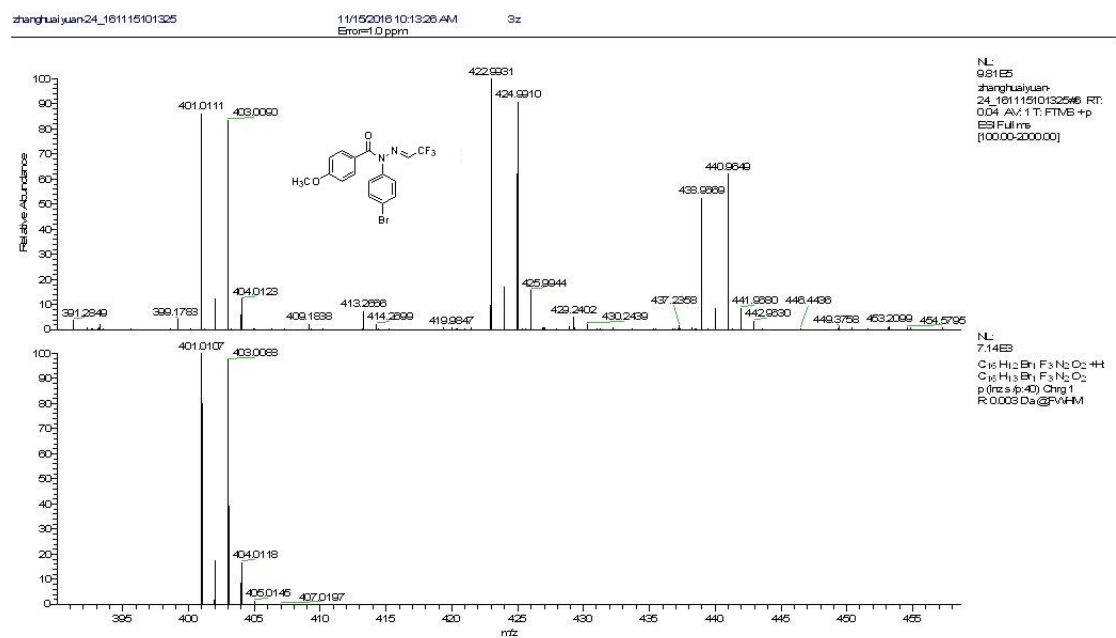

$^1\text{H}$  NMR copies of compound **6aa**:

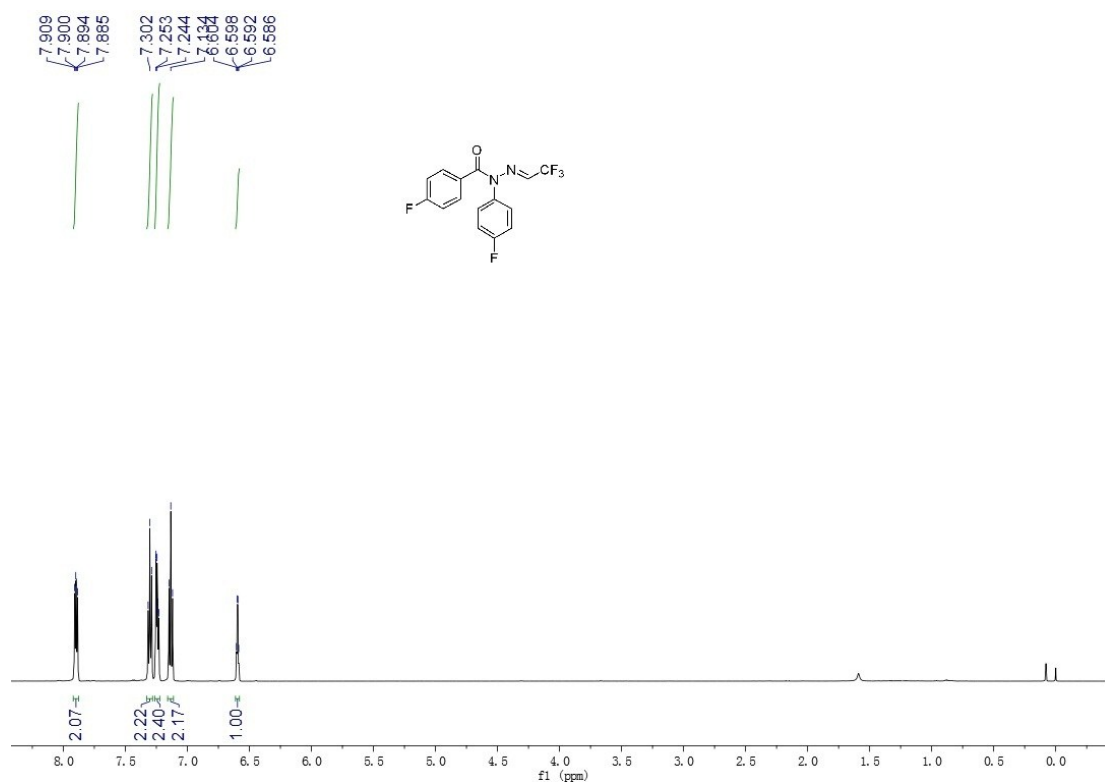

$^{13}\text{C}$  NMR copies of compound **6aa**:

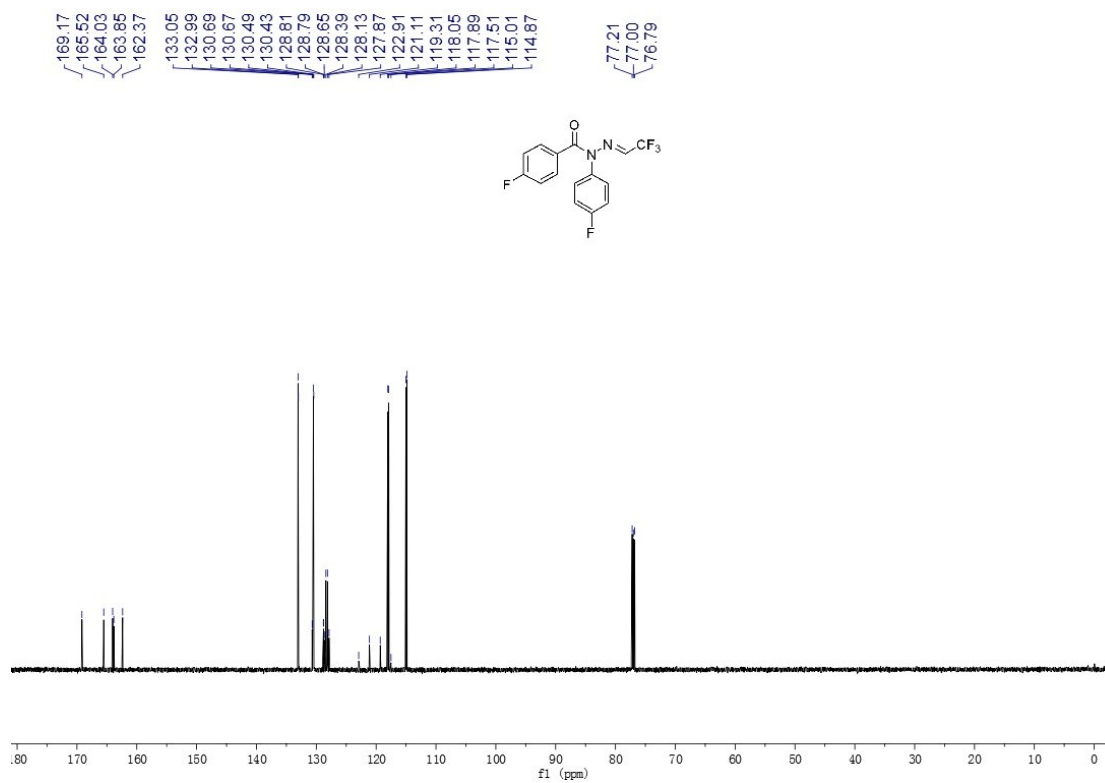

$^{19}\text{F}$  NMR copies of compound **6aa**:

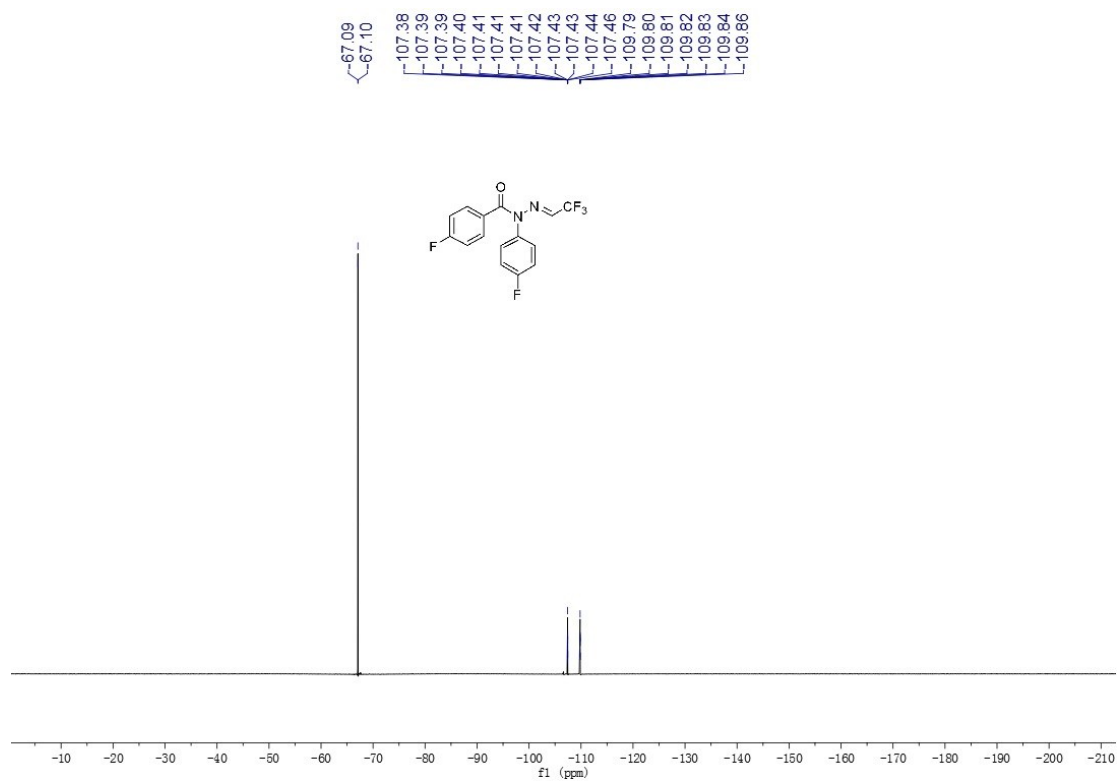

HRMS (ESI) of compound **6aa**:

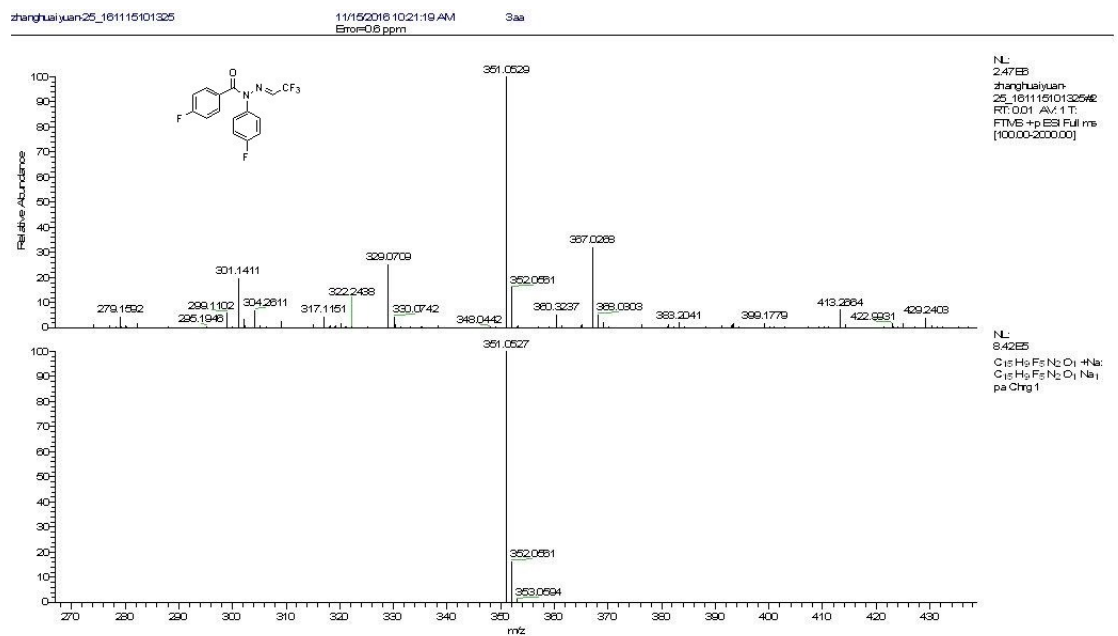

$^1\text{H}$  NMR copies of compound **6ab**:

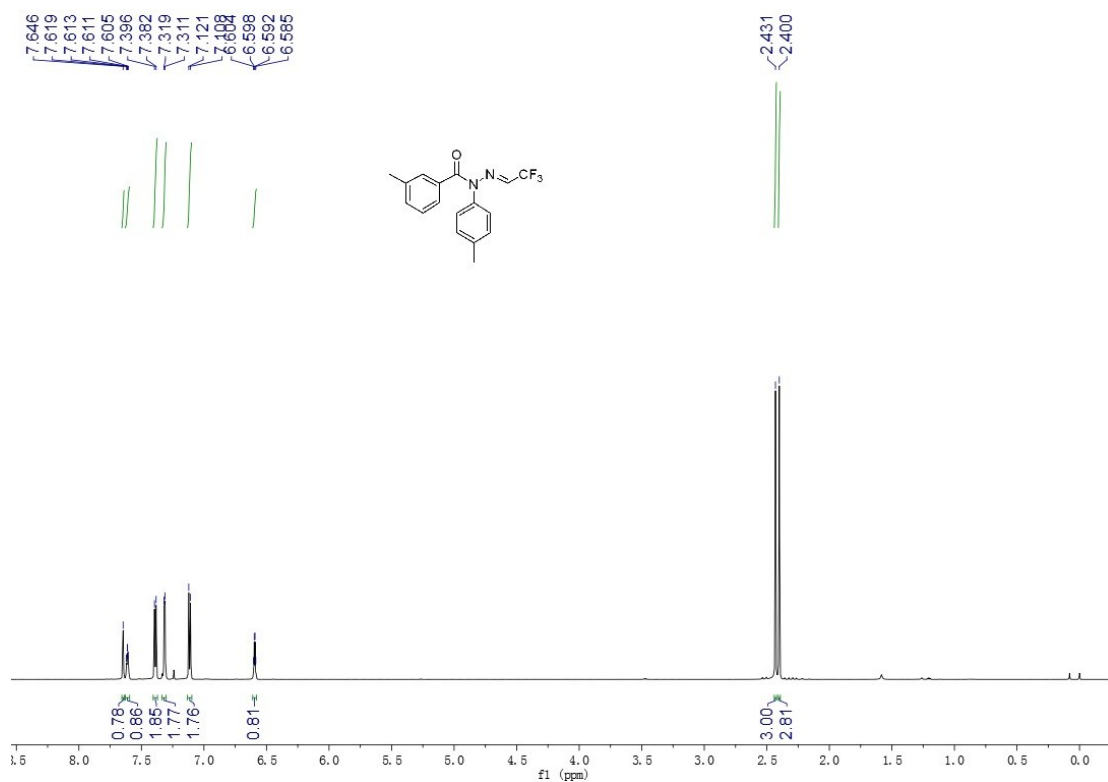

$^{13}\text{C}$  NMR copies of compound **6ab**:

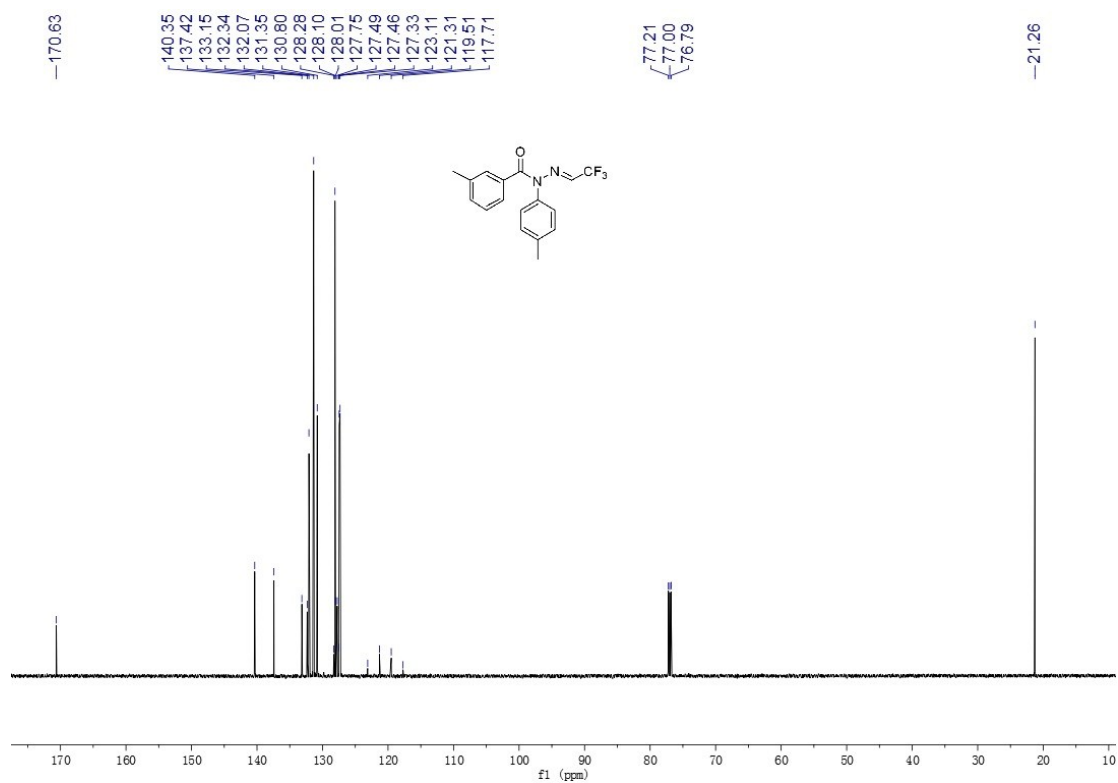

Chemical structure: Cc1ccc(cc1)C(=O)N(C#N)Cc2ccc(C)cc2

Chemical shift (ppm): -67.02, -67.03

13C NMR spectrum (CDCl<sub>3</sub>) showing a single peak at approximately -67.0 ppm, corresponding to the solvent.

zhenghuiyuan-21\_161114171945

11/15/2018 9:44:52 AM

3v

Error=1.2 ppm

Relative Abundance

321.1213

343.1034

359.0774

322.1246

344.1006

350.0606

321.1209

322.1243

323.1276

321.1213

343.1034

359.0774

322.1246

344.1006

350.0606

321.1209

322.1243

323.1276

287.2222

298.1106

301.1415

304.2615

317.1156

323.1280

338.3427

345.1101

355.0270

371.2311

383.2048

393.2132

398.1788

290

300

310

320

330

340

350

360

370

380

390

400

m/z

NI:  
7.02E5  
zhenghuiyuan-  
21\_161114171945#4  
RT: 0.03 AU: 17  
FT/MS+p ES Full ms  
[100.00-2000.00]

NI:  
8.23E5  
C17H15F3N2O1 +H  
C17H15F3N2O1  
pe Chrg 1

<sup>1</sup>H NMR copies of compound **6ac**:

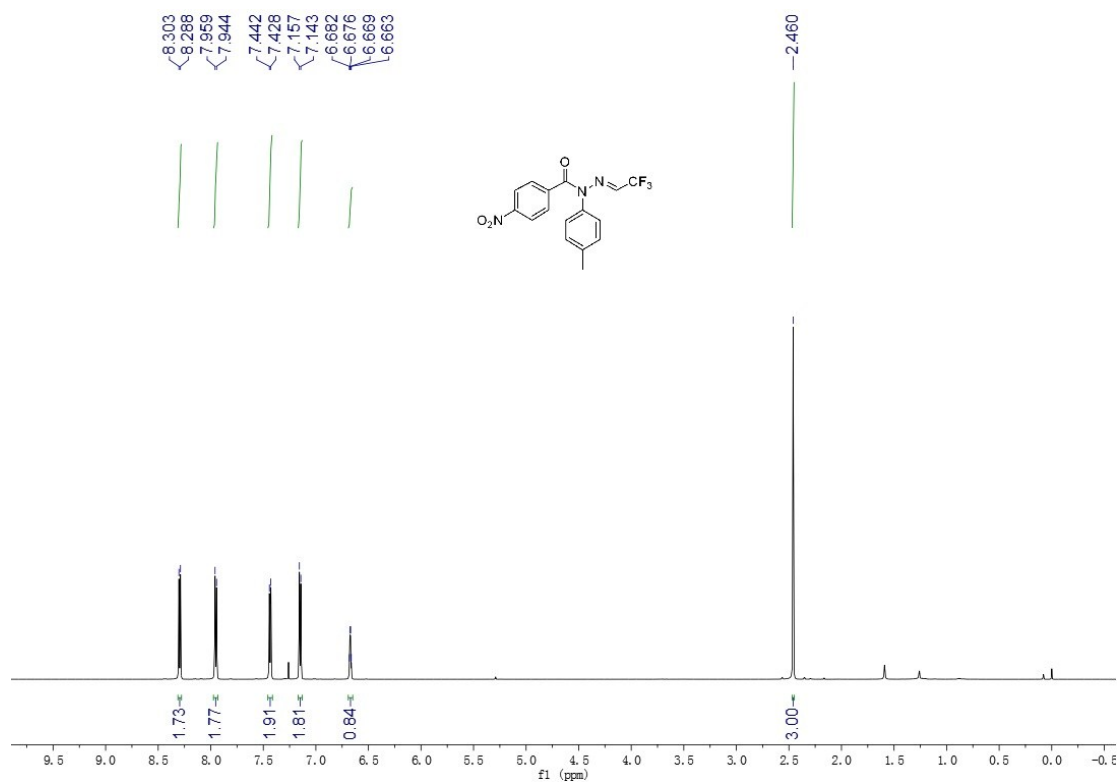

<sup>13</sup>C NMR copies of compound **6ac**:

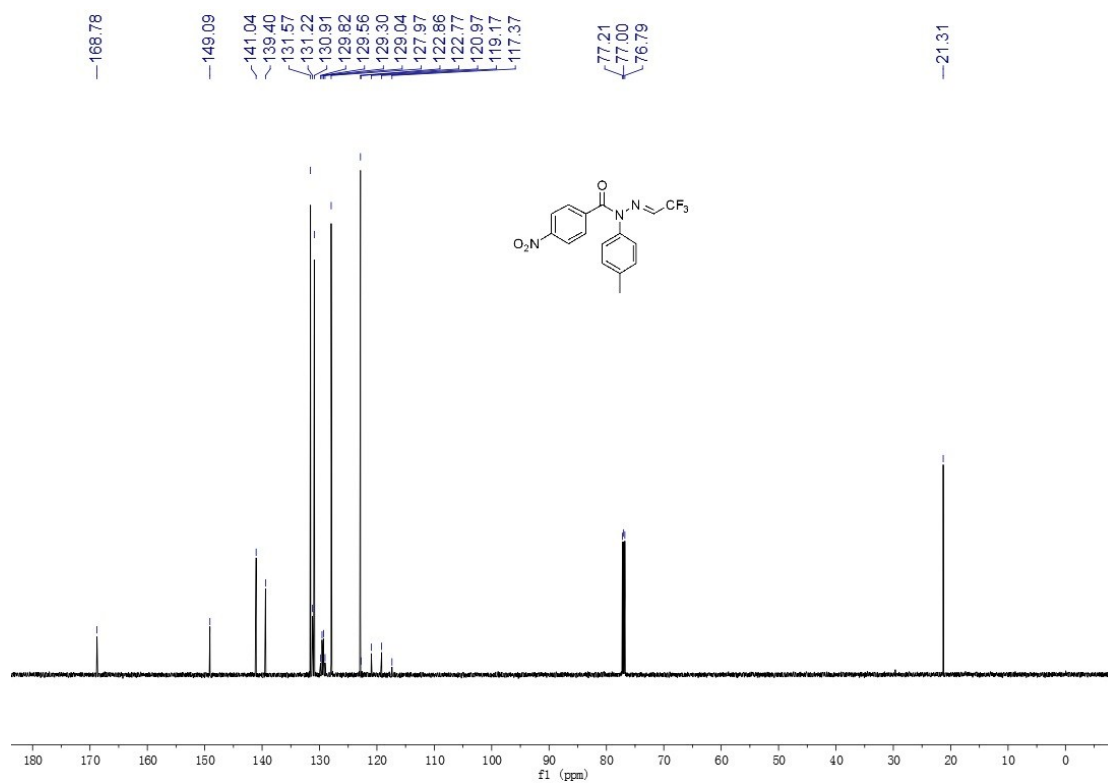

$^{19}\text{F}$  NMR copies of compound **6ac**:

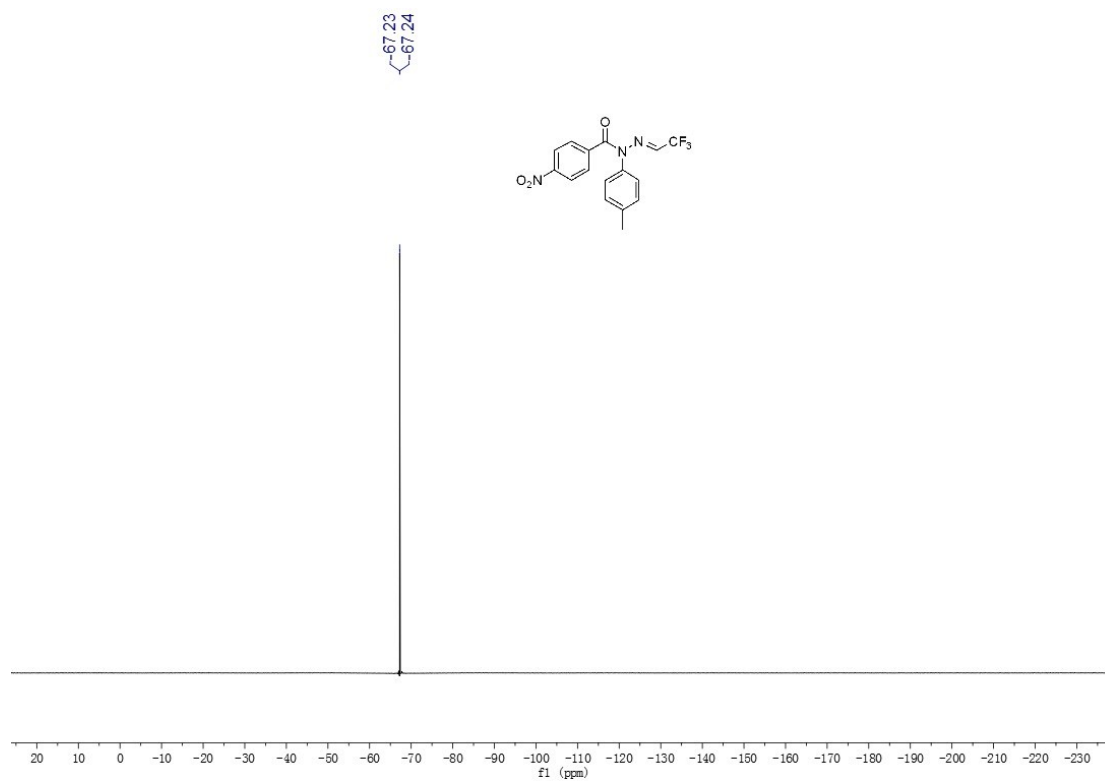

HRMS (ESI) of compound **6ac**:

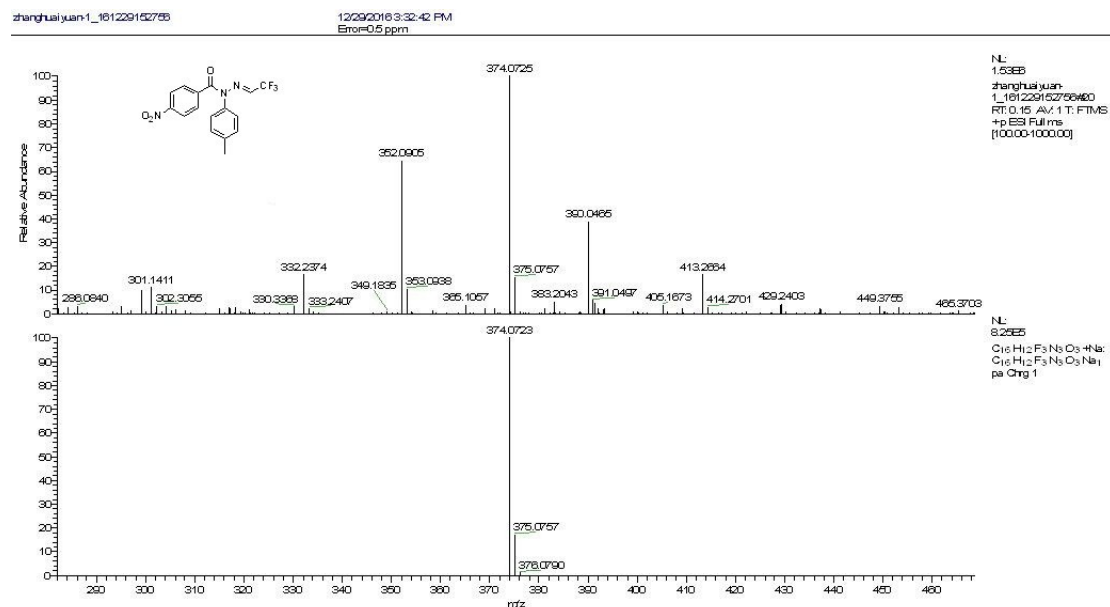

$^1\text{H}$  NMR copies of compound 7:

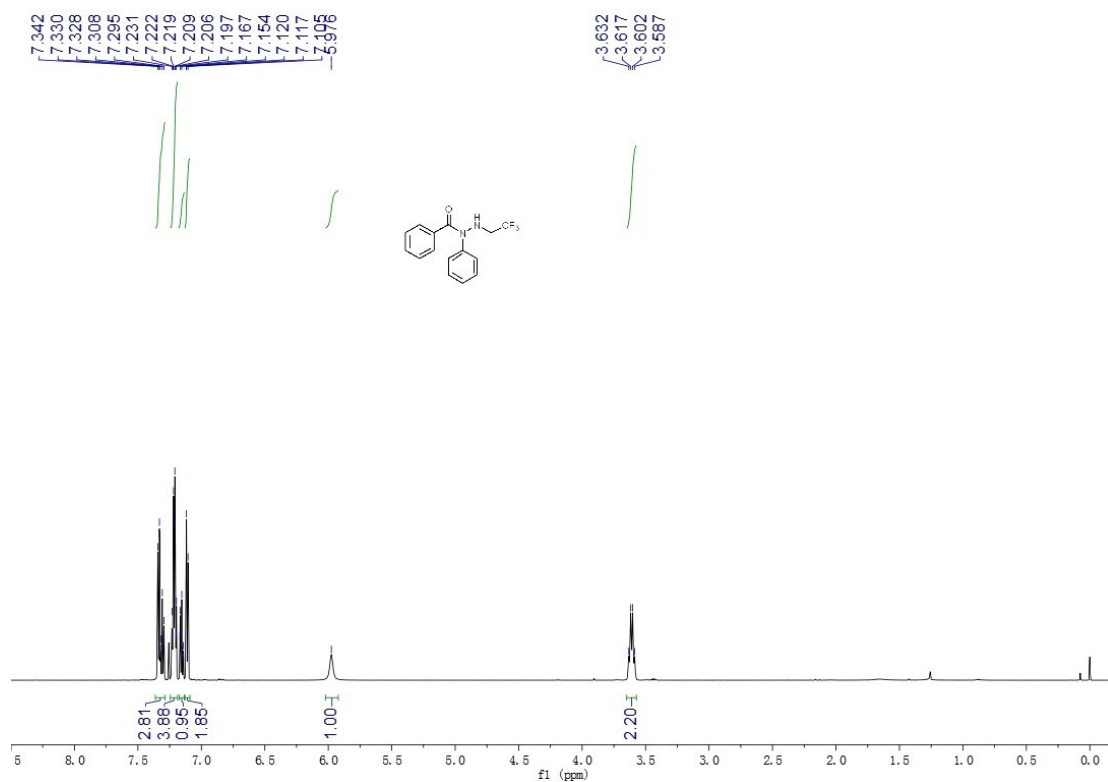

$^{13}\text{C}$  NMR copies of compound 7:

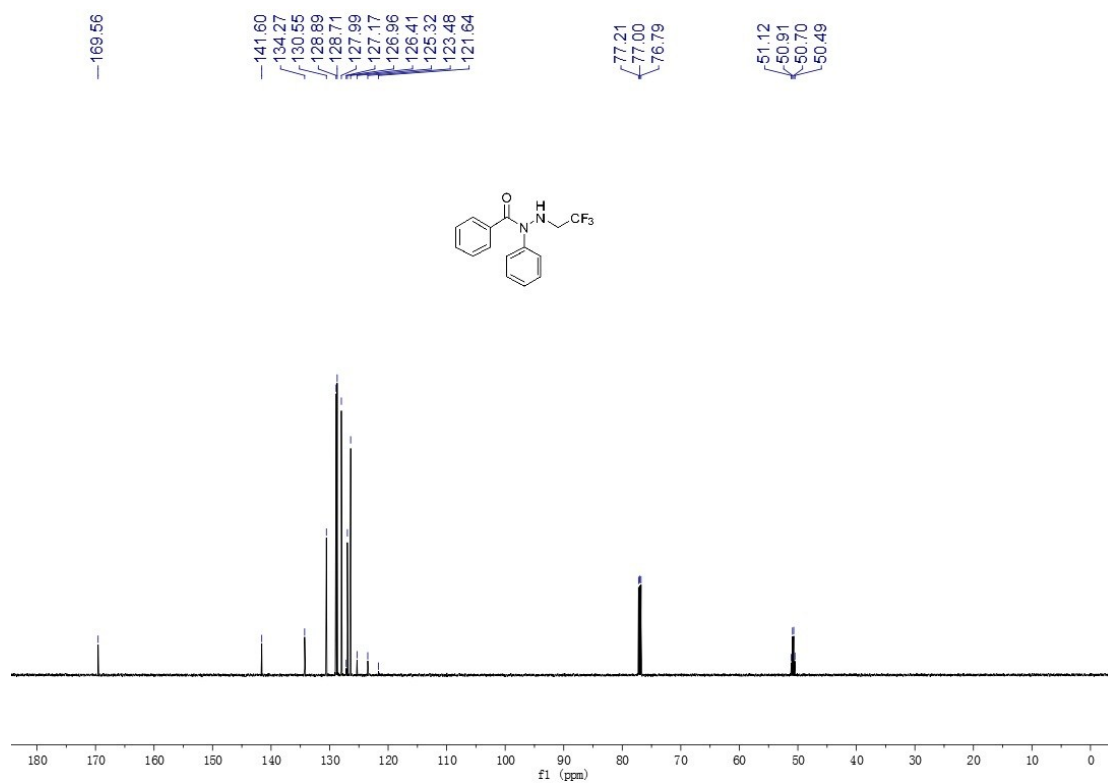

$^{19}\text{F}$  NMR copies of compound **7**:

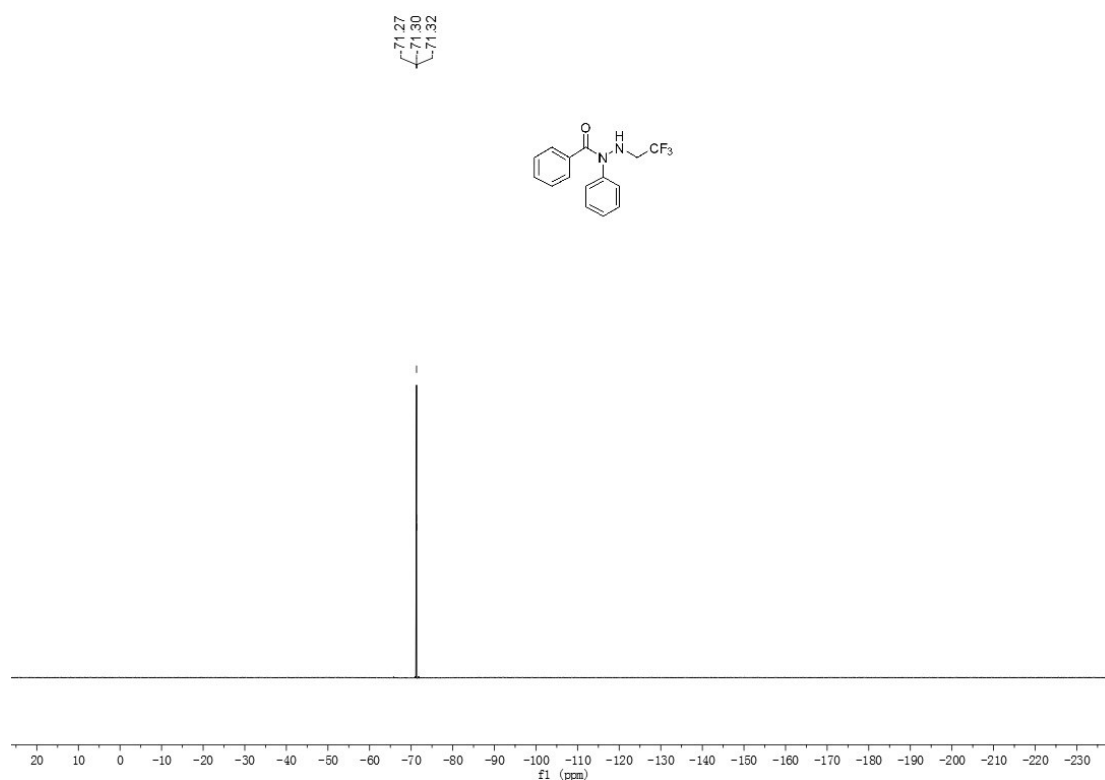

HRMS (ESI) of compound **7**:

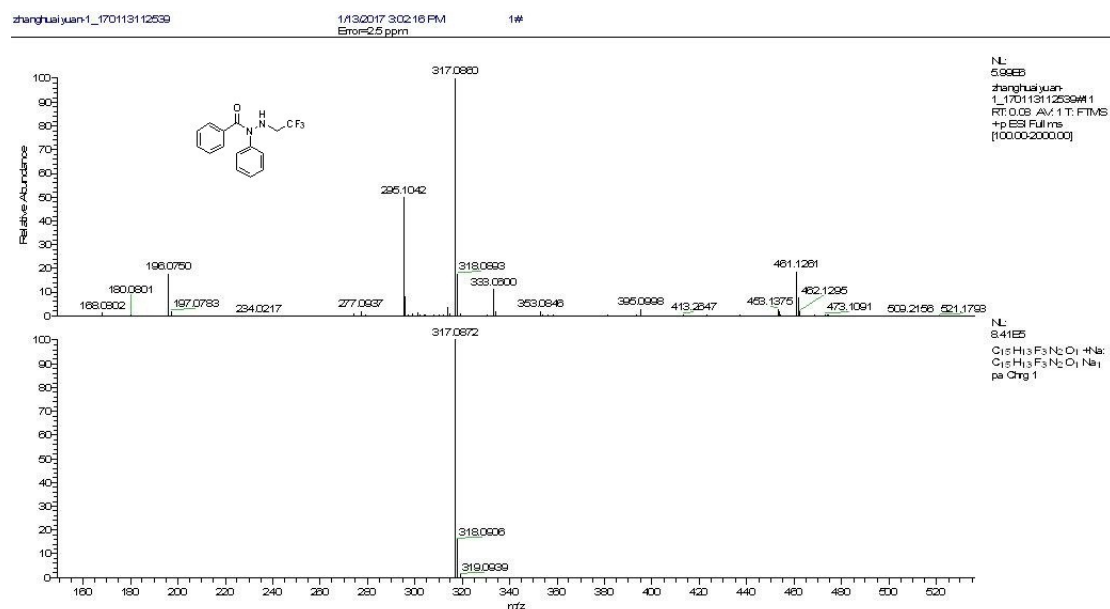

$^1\text{H}$  NMR copies of compound **8**:

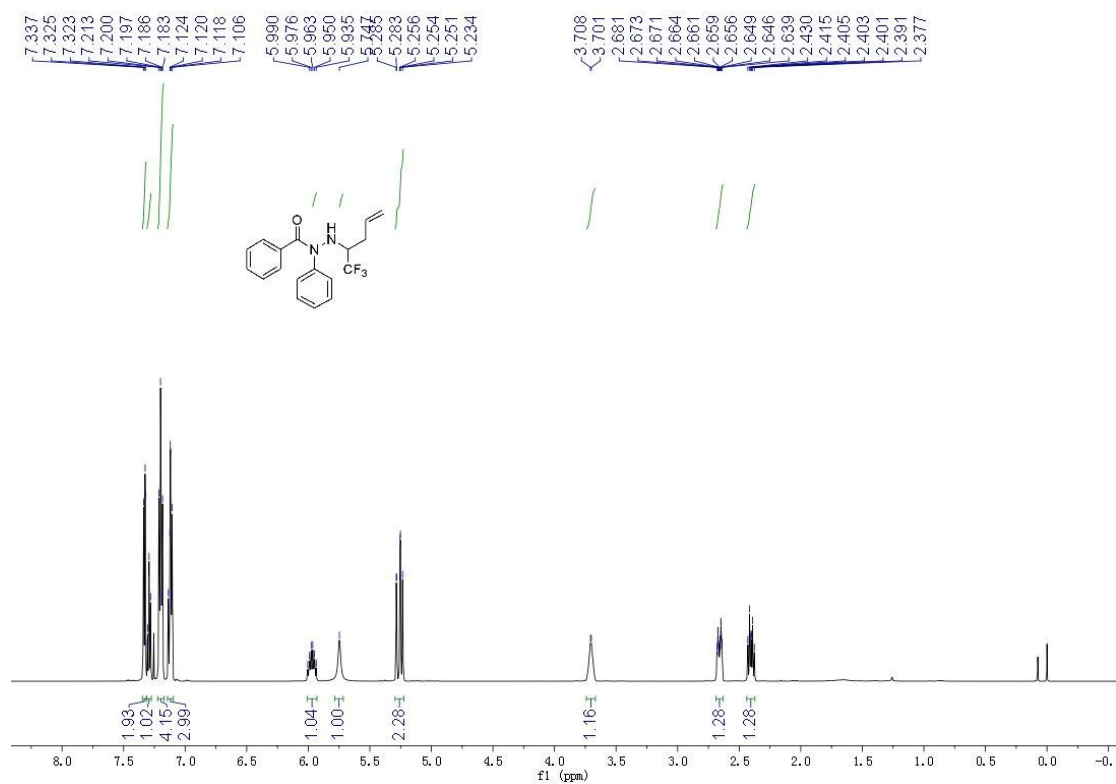

$^{13}\text{C}$  NMR copies of compound **8**:

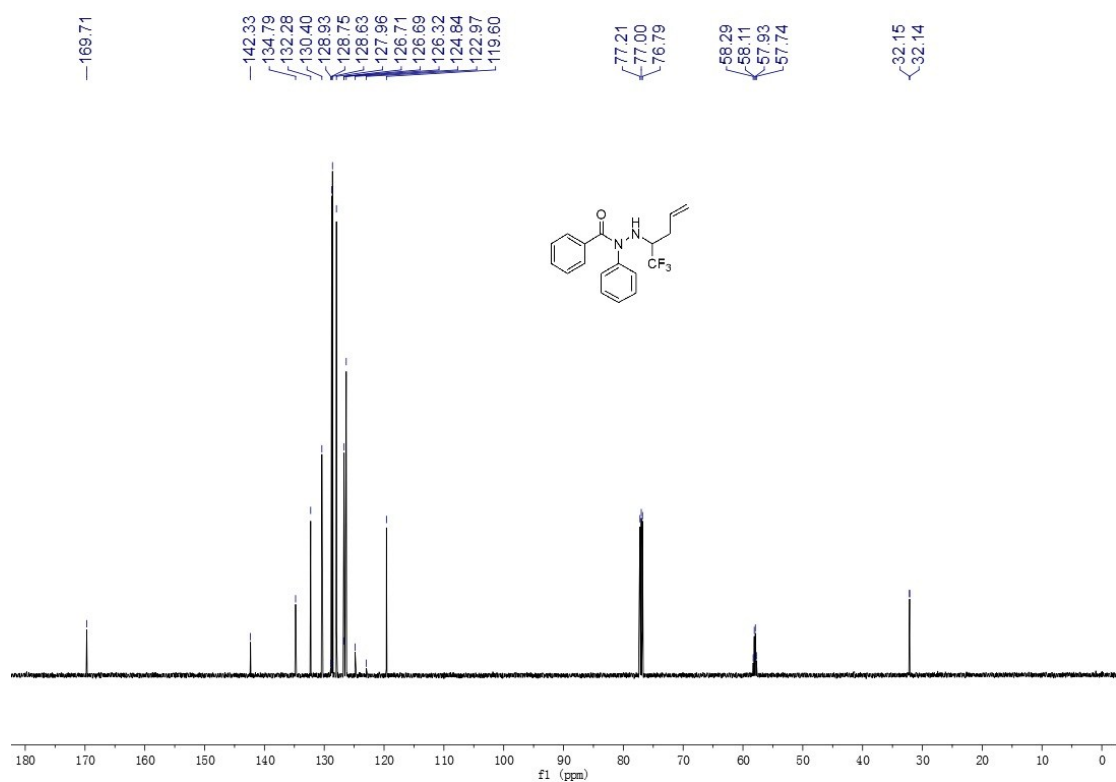

$^{19}\text{F}$  NMR copies of compound **8**:

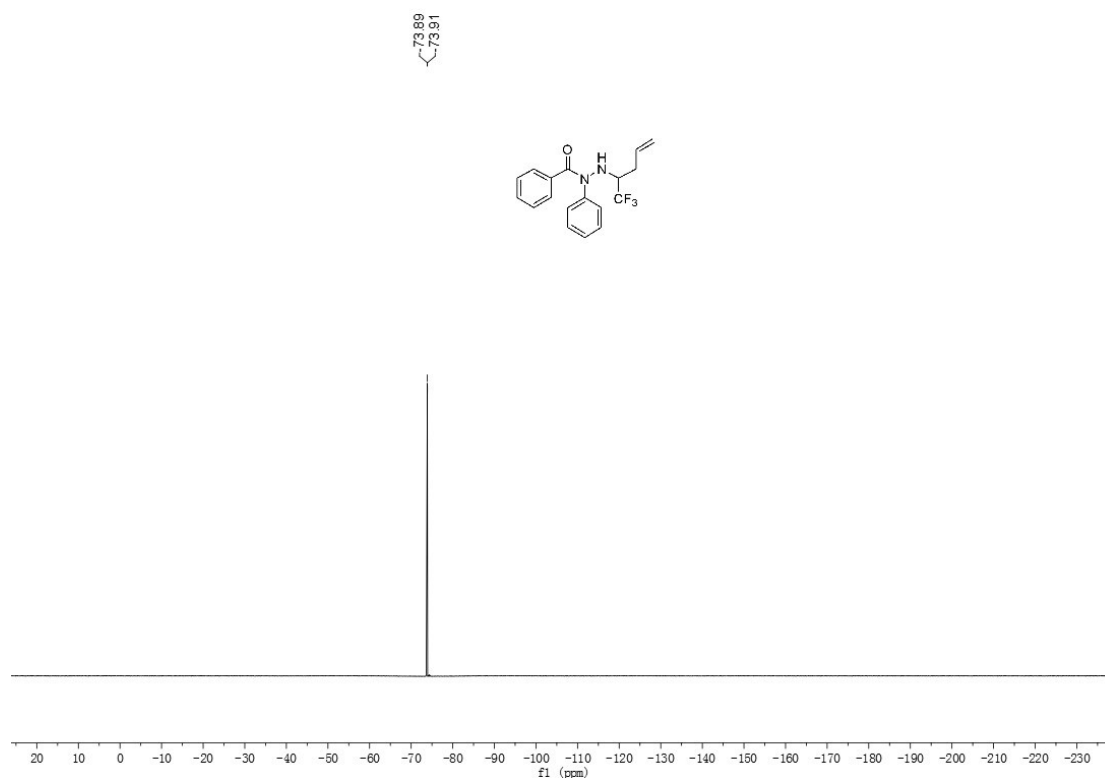

HRMS (ESI) of compound **8**:

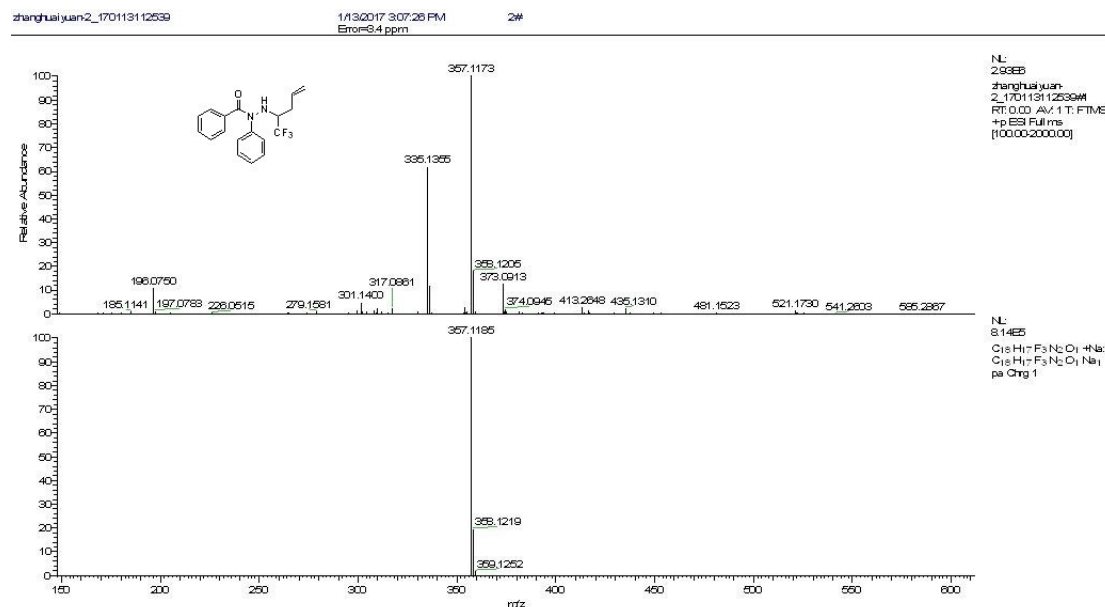

Supplement: c9ob00236g1.pdf [file c9ob00236g1.pdf]
